# Supplementary material for: Immune landscape of the affected brain in Rasmussen encephalitis
Source: Research Square preprint supplement (doi:10.21203/rs.3.rs-8584794/v1), 2026-01-29
Supplement: Supplementary file 1 [file 0a0c30ed7613145a4fd7e1e2.xlsx]

## Sheet: 738
v_gene	j_gene	c_gene	cdr3	cdr3_nt	counts	frequency	phenotype	public	private
TRBV12-4	TRBJ2-1	TRBC2	CASSFSGLAAYNEQFF	TGTGCCAGCAGTTTCTCGGGACTAGCTGCATACAATGAGCAGTTCTTC	47	3.57414	CD8	P
TRBV12-4	TRBJ2-7	TRBC2	CASSRGAGGTYEQYF	TGTGCCAGCAGTCGGGGAGCGGGGGGAACCTACGAGCAGTACTTC	41	3.11787	CD8	P
TRBV6-2	TRBJ2-5	TRBC2	CASSSRDRSQETQYF	TGTGCCAGCAGTTCCCGGGACAGGAGCCAAGAGACCCAGTACTTC	22	1.673	CD8	P
TRBV19	TRBJ2-7	TRBC2	CASSMGSHEQYF	TGTGCCAGTAGTATGGGCAGCCACGAGCAGTACTTC	17	1.29278	CD8	P
TRBV7-2	TRBJ2-7	TRBC2	CASRLGFSEQYF	TGTGCCAGCAGGCTGGGGTTTAGCGAGCAGTACTTC	16	1.21673	CD8	P
TRBV7-3	TRBJ2-3	TRBC2	CASSFRLAGGPTDTQYF	TGTGCCAGCAGCTTCCGACTAGCGGGAGGTCCCACAGATACGCAGTATTTT	16	1.21673	CD8	P
TRBV7-9	TRBJ2-5	TRBC2	CASSGPGTGEQETQYF	TGTGCCAGCAGCGGGCCAGGGACAGGTGAACAAGAGACCCAGTACTTC	16	1.21673	CD8	P
TRBV3-1	TRBJ1-2	TRBC1	CASSPDRGADYGYTF	TGTGCCAGCAGCCCCGATCGAGGGGCTGACTATGGCTACACCTTC	16	1.21673	CD8	P
TRBV3-1	TRBJ2-1	TRBC2	CASSQEGQGYNEQFF	TGTGCCAGCAGCCAAGAGGGACAGGGCTACAATGAGCAGTTCTTC	16	1.21673	CD8	P
TRBV11-2	TRBJ1-2	TRBC1	CASSFGGGSHYGYTF	TGTGCCAGCAGCTTCGGAGGGGGCTCGCACTATGGCTACACCTTC	14	1.06464	CD8	P
TRBV6-1	TRBJ2-3	TRBC2	CASSPGTGSDTQYF	TGTGCCAGCAGCCCCGGGACAGGGTCGGATACGCAGTATTTT	14	1.06464	CD4	P
TRBV7-9	TRBJ1-1	TRBC1	CASSRTLEAFF	TGTGCCAGCAGTCGTACGCTTGAAGCTTTCTTT	14	1.06464	CD8	P
TRBV4-3	TRBJ2-5	TRBC2	CASSQDFLFGTEETQYF	TGCGCCAGCAGCCAAGATTTTCTTTTCGGGACAGAGGAGACCCAGTACTTC	56	4.25856	CD8		P
TRBV20-1	TRBJ2-3	TRBC2	CSARPNPTGTSTDTQYF	TGCAGTGCTAGACCTAACCCGACAGGGACTAGCACAGATACGCAGTATTTT	33	2.50951	CD8		P
TRBV30	TRBJ2-3	TRBC2	CAWSKAGGGFRTQYF	TGTGCCTGGAGTAAGGCGGGCGGGGGTTTTCGTACGCAGTATTTT	23	1.74905	CD8		P
TRBV2	TRBJ1-1	TRBC1	CASSSMGLKTENTEAFF	TGTGCCAGCAGTTCTATGGGGCTTAAGACAGAGAACACTGAAGCTTTCTTT	21	1.59696	CD8		P
TRBV28	TRBJ2-5	TRBC2	CASSLCITCHLPGETQYF	TGTGCCAGCAGTTTATGCATAACTTGTCACCTCCCGGGAGAGACCCAGTACTTC	14	1.06464	CD8		P
TRBV7-6	TRBJ2-3	TRBC2	CASSAGTSVTDTQYF	TGTGCCAGCAGCGCTGGGACTAGCGTCACAGATACGCAGTATTTT	11	0.836502
TRBV25-1	TRBJ2-2	TRBC2	CASSDWREIRGELFF	TGTGCCAGCAGTGATTGGCGGGAGATTCGGGGGGAGCTGTTTTTT	11	0.836502
TRBV11-3	TRBJ2-2	TRBC2	CASSLVFGRQGYTGELFF	TGTGCCAGCAGCTTAGTATTCGGCCGACAGGGGTACACCGGGGAGCTGTTTTTT	11	0.836502
TRBV5-1	TRBJ2-6	TRBC2	CASSLSGTGGVSSGANVLTF	TGCGCCAGCAGCTTGTCCGGGACAGGGGGCGTCAGCTCTGGGGCCAACGTCCTGACTTTC	9	0.684411
TRBV3-1	TRBJ2-3	TRBC2	CASSQDSTDTQYF	TGTGCCAGCAGCCAAGATAGCACAGATACGCAGTATTTT	8	0.608365
TRBV20-1	TRBJ2-7	TRBC2	CSAREAGYGGTASYEQYF	TGCAGTGCTAGAGAAGCGGGATATGGCGGGACGGCTTCCTACGAGCAGTACTTC	8	0.608365
TRBV11-2	TRBJ1-2	TRBC1	CASSLGGYGYTF	TGTGCCAGCAGCTTAGGCGGCTATGGCTACACCTTC	7	0.532319
TRBV10-3	TRBJ2-7	TRBC2	CAISEDGSPTYEQYF	TGTGCCATCAGTGAGGACGGGAGTCCAACCTACGAGCAGTACTTC	7	0.532319
TRBV2	TRBJ2-7	TRBC2	CASIKWVTPYEQYF	TGTGCCAGCATTAAATGGGTAACCCCCTACGAGCAGTACTTC	7	0.532319
TRBV11-2	TRBJ2-7	TRBC2	CASSLGQGPYEQYF	TGTGCCAGCAGCTTAGGACAGGGGCCCTACGAGCAGTACTTC	7	0.532319
TRBV7-2	TRBJ2-7	TRBC2	CASSLNSLSYEQYF	TGTGCCAGCAGTTTGAATAGTCTCTCCTACGAGCAGTACTTC	7	0.532319
TRBV27	TRBJ2-6	TRBC2	CASSLTSGVSGANVLTF	TGTGCCAGCAGTTTAACTAGCGGGGTCTCTGGGGCCAACGTCCTGACTTTC	7	0.532319
TRBV15	TRBJ2-3	TRBC2	CATSTERGGDTQYF	TGTGCCACCAGCACAGAAAGAGGGGGAGATACGCAGTATTTT	7	0.532319
TRBV28	TRBJ2-7	TRBC2	CASRPHTEVYEQYF	TGTGCCAGCAGGCCGCATACGGAAGTTTACGAGCAGTACTTC	6	0.456274
TRBV7-9	TRBJ2-7	TRBC2	CASSFVPSGDYEQYF	TGTGCCAGCAGCTTTGTTCCTAGCGGAGACTACGAGCAGTACTTC	6	0.456274
TRBV11-2	TRBJ2-1	TRBC2	CASSPYENEQFF	TGTGCCAGCAGCCCGTATGAGAATGAGCAGTTCTTC	6	0.456274
TRBV6-2	TRBJ2-7	TRBC2	CASSRLWPKYEQYF	TGTGCCAGCAGTCGGCTGTGGCCTAAATACGAGCAGTACTTC	6	0.456274
TRBV5-6	TRBJ1-1	TRBC1	CASSSHDRTNTEAFF	TGTGCCAGCAGTTCACACGACAGGACGAACACTGAAGCTTTCTTT	6	0.456274
TRBV6-5	TRBJ1-2	TRBC1	CASSYHPLGYGYTF	TGTGCCAGCAGTTACCACCCCTTGGGCTATGGCTACACCTTC	6	0.456274
TRBV2	TRBJ2-1	TRBC2	CASTEQRGSYNEQFF	TGTGCCAGCACCGAACAGCGGGGCAGTTACAATGAGCAGTTCTTC	6	0.456274
TRBV18	TRBJ1-6	TRBC1	CASSADAFYNSPLHF	TGTGCCAGCTCAGCGGATGCCTTTTATAATTCACCCCTCCACTTT	5	0.380228
TRBV18	TRBJ1-1	TRBC1	CASSLDRDTEAFF	TGTGCCAGCTCATTAGACAGGGACACTGAAGCTTTCTTT	5	0.380228
TRBV5-4	TRBJ2-1	TRBC2	CASSLKEGADEQFF	TGTGCCAGCAGCCTAAAAGAGGGGGCGGATGAGCAGTTCTTC	5	0.380228
TRBV13	TRBJ1-2	TRBC1	CASSLLARDGYTF	TGTGCCAGCAGCTTATTGGCCCGGGATGGCTACACCTTC	5	0.380228
TRBV13	TRBJ1-1	TRBC1	CASSLVGAGTEAFF	TGTGCCAGCAGCTTAGTGGGGGCGGGAACTGAAGCTTTCTTT	5	0.380228
TRBV3-1	TRBJ1-3	TRBC1	CASSPGTSGNTIYF	TGTGCCAGCAGCCCCGGGACCTCTGGAAACACCATATATTTT	5	0.380228
TRBV13	TRBJ2-1	TRBC2	CASSQLMMADSYNEQFF	TGTGCCAGCAGCCAGCTTATGATGGCGGACTCCTACAATGAGCAGTTCTTC	5	0.380228
TRBV30	TRBJ1-1	TRBC1	CAWRKQGGNTEAFF	TGTGCCTGGAGAAAACAGGGAGGGAACACTGAAGCTTTCTTT	5	0.380228
TRBV2	TRBJ2-2	TRBC2	CASRGLNTGELFF	TGTGCCAGCAGAGGACTGAACACCGGGGAGCTGTTTTTT	4	0.304183
TRBV10-1	TRBJ1-1	TRBC1	CASSEREGGGTEAFF	TGCGCCAGCAGTGAAAGGGAAGGAGGCGGCACTGAAGCTTTCTTT	4	0.304183
TRBV2	TRBJ1-2	TRBC1	CASSGGPDGYTF	TGTGCCAGCAGTGGCGGGCCGGATGGCTACACCTTC	4	0.304183
TRBV11-2	TRBJ2-1	TRBC2	CASSLDLGSEQFF	TGTGCCAGCAGCTTAGATCTGGGGAGTGAGCAGTTCTTC	4	0.304183
TRBV14	TRBJ2-1	TRBC2	CASSLGLGGFYNEQFF	TGTGCCAGCAGCCTCGGTCTGGGGGGATTTTACAATGAGCAGTTCTTC	4	0.304183
TRBV5-6	TRBJ2-7	TRBC2	CASSLIPDSPYEQYF	TGTGCCAGCAGCTTGATCCCGGACAGCCCCTACGAGCAGTACTTC	4	0.304183
TRBV18	TRBJ1-5	TRBC1	CASSPGQGSQPQHF	TGTGCCAGCTCACCGGGGCAGGGGAGTCAGCCCCAGCATTTT	4	0.304183
TRBV18	TRBJ2-3	TRBC2	CASSPLLTDTQYF	TGTGCCAGCTCACCCCTTCTCACAGATACGCAGTATTTT	4	0.304183
TRBV18	TRBJ2-5	TRBC2	CASSPSHVDRETQYF	TGTGCCAGCTCACCTTCCCACGTGGACAGAGAGACCCAGTACTTC	4	0.304183
TRBV5-6	TRBJ2-7	TRBC2	CASSSLNRGAYEQYF	TGTGCCAGCAGCTCCTTGAACAGGGGAGCCTACGAGCAGTACTTC	4	0.304183
TRBV7-9	TRBJ1-1	TRBC1	CASSTGWDTEAFF	TGTGCCAGCAGCACGGGATGGGACACTGAAGCTTTCTTT	4	0.304183
TRBV9	TRBJ1-6		CASTTQGSNSPLHF	TGTGCCAGCACCACACAGGGAAGTAATTCACCCCTCCACTTT	4	0.304183
TRBV20-1	TRBJ1-5	TRBC1	CSAPGGGPQPQHF	TGCAGTGCCCCTGGAGGGGGACCCCAGCCCCAGCATTTT	4	0.304183
TRBV29-1	TRBJ2-7	TRBC2	CSVVSRGQGYEQYF	TGCAGCGTTGTCAGTCGGGGACAGGGGTACGAGCAGTACTTC	4	0.304183
TRBV20-1	TRBJ1-5	TRBC1	CSAPAGEGQPQHF	TGCAGTGCCCCCGCGGGGGAAGGTCAGCCCCAGCATTTT	4	0.304183
TRBV27	TRBJ1-5	TRBC1	CASGPGTGGLVSNQPQHF	TGTGCCAGCGGCCCCGGGACAGGGGGTTTGGTCAGCAATCAGCCCCAGCATTTT	3	0.228137
TRBV27	TRBJ1-1	TRBC1	CASHKIGSEAFF	TGTGCCAGTCATAAAATCGGTTCTGAAGCTTTCTTT	3	0.228137
TRBV3-1	TRBJ2-5	TRBC2	CASRQPATETQYF	TGTGCCAGCAGGCAACCCGCCACTGAGACCCAGTACTTC	3	0.228137
TRBV7-9	TRBJ2-6	TRBC2	CASSEQGAGASGANVLTF	TGTGCCAGCAGCGAACAGGGGGCTGGTGCCTCTGGGGCCAACGTCCTGACTTTC	3	0.228137
TRBV6-2	TRBJ2-4	TRBC2	CASSEQGNDGLAKNIQYF	TGTGCCAGCAGTGAACAGGGGAATGACGGATTAGCCAAAAACATTCAGTACTTC	3	0.228137
TRBV10-2	TRBJ1-6	TRBC1	CASSEVRGYNSPLHF	TGCGCCAGCAGTGAGGTCCGGGGCTATAATTCACCCCTCCACTTT	3	0.228137
TRBV10-2	TRBJ2-7	TRBC2	CASSGGRGGSAFSYEQYF	TGCGCCAGCAGTGGTGGGCGGGGAGGCAGCGCCTTTAGCTACGAGCAGTACTTC	3	0.228137
TRBV25-1	TRBJ2-2	TRBC2	CASSGRQGAGGELFF	TGTGCCAGCAGTGGAAGACAGGGGGCGGGCGGGGAGCTGTTTTTT	3	0.228137
TRBV7-2	TRBJ2-5	TRBC2	CASSGTGPQETQYF	TGTGCCAGCAGCGGCACCGGGCCCCAAGAGACCCAGTACTTC	3	0.228137
TRBV7-6	TRBJ2-1	TRBC2	CASSLGTGGPGSYNEQFF	TGTGCCAGCAGCTTGGGAACAGGGGGCCCTGGCTCCTACAATGAGCAGTTCTTC	3	0.228137
TRBV7-9	TRBJ1-2	TRBC1	CASSLQADRGVNTF	TGTGCCAGCAGCTTGCAAGCGGACAGGGGGGTCAACACCTTC	3	0.228137
TRBV5-6	TRBJ1-5	TRBC1	CASSLRPDRLLNQPQHF	TGTGCCAGCAGCTTGAGGCCAGACAGGCTGTTGAATCAGCCCCAGCATTTT	3	0.228137
TRBV5-6	TRBJ1-2	TRBC1	CASSLVAGERDYGYTF	TGTGCCAGCAGCTTGGTCGCGGGGGAGCGGGACTATGGCTACACCTTC	3	0.228137
TRBV7-2	TRBJ2-7	TRBC2	CASSLVGQGKTSSYEQYF	TGTGCCAGCAGCTTAGTGGGACAGGGAAAAACTAGCTCCTACGAGCAGTACTTC	3	0.228137
TRBV18	TRBJ2-1	TRBC2	CASSPDRGAHNEQFF	TGTGCCAGCTCACCCGACAGGGGGGCACACAATGAGCAGTTCTTC	3	0.228137
TRBV7-6	TRBJ2-7	TRBC2	CASSPIDPGTSGIGGEQYF	TGTGCCAGCAGCCCCATAGACCCCGGGACTAGCGGGATAGGGGGCGAGCAGTACTTC	3	0.228137
TRBV11-3	TRBJ2-5	TRBC2	CASSPMDMPRETQYF	TGTGCCAGCAGCCCCATGGATATGCCGCGGGAGACCCAGTACTTC	3	0.228137
TRBV7-9	TRBJ1-5	TRBC1	CASSPPGNNQPQHF	TGTGCCAGCAGCCCACCAGGGAACAATCAGCCCCAGCATTTT	3	0.228137
TRBV6-5	TRBJ1-2	TRBC1	CASSPRQGIRYGYTF	TGTGCCAGCAGCCCGAGACAGGGGATACGGTATGGCTACACCTTC	3	0.228137
TRBV9	TRBJ2-7	TRBC2	CASSPRTGSSYEQYF	TGTGCCAGCAGCCCCCGGACAGGTTCCTCGTACGAGCAGTACTTC	3	0.228137
TRBV18	TRBJ2-7	TRBC2	CASSPSTYEQYF	TGTGCCAGCTCACCGAGCACCTACGAGCAGTACTTC	3	0.228137
TRBV4-3	TRBJ2-1	TRBC2	CASSQDSFRTGLVDEQFF	TGCGCCAGCAGCCAAGATTCTTTCCGGACAGGACTTGTCGATGAGCAGTTCTTC	3	0.228137
TRBV3-1	TRBJ2-1	TRBC2	CASSQGTSGDREQFF	TGTGCCAGCAGCCAAGGGACTAGCGGGGATCGGGAGCAGTTCTTC	3	0.228137
TRBV19	TRBJ2-5	TRBC2	CASSTRWVSDGRETQYF	TGTGCCAGTAGTACCCGGTGGGTAAGCGATGGGCGAGAGACCCAGTACTTC	3	0.228137
TRBV9	TRBJ1-4	TRBC1	CASSVGFRGRNEKLFF	TGTGCCAGCAGCGTAGGATTCAGGGGGCGGAATGAAAAACTGTTTTTT	3	0.228137
TRBV28	TRBJ1-5	TRBC1	CASSVGGNQPQHF	TGTGCCAGCAGTGTGGGCGGTAATCAGCCCCAGCATTTT	3	0.228137
TRBV12-4	TRBJ2-2	TRBC2	CASSVTGTGFGELFF	TGTGCCAGCAGTGTTACCGGGACAGGGTTCGGGGAGCTGTTTTTT	3	0.228137
TRBV24-1	TRBJ2-1	TRBC2	CATSFNNEQFF	TGTGCCACCAGTTTCAACAATGAGCAGTTCTTC	3	0.228137
TRBV30	TRBJ2-7	TRBC2	CAWSVGGEQYF	TGTGCCTGGAGTGTAGGGGGCGAGCAGTACTTC	3	0.228137
TRBV20-1	TRBJ2-3	TRBC2	CSAAQGGRRGDTQYF	TGCAGTGCTGCTCAGGGGGGCAGACGGGGAGATACGCAGTATTTT	3	0.228137
TRBV20-1	TRBJ2-1	TRBC2	CSARLAGGSSYNEQFF	TGCAGTGCTAGACTAGCGGGGGGTAGCTCCTACAATGAGCAGTTCTTC	3	0.228137
TRBV10-1	TRBJ1-1	TRBC1	CASSSTGGNTEAFF	TGCGCCAGCAGTTCTACAGGGGGGAACACTGAAGCTTTCTTT	2	0.152091
TRBV9	TRBJ2-1	TRBC2	CASSVLAGGQNEQFF	TGTGCCAGCAGCGTACTAGCGGGAGGGCAGAATGAGCAGTTCTTC	2	0.152091
TRBV10-3	TRBJ1-2	TRBC1	CAIAGRGYGYTF	TGTGCCATCGCGGGCAGGGGCTATGGCTACACCTTC	2	0.152091
TRBV10-3	TRBJ2-3	TRBC2	CAISESRFWRGKPRDARNTQYF	TGTGCCATCAGTGAGTCTCGGTTCTGGCGGGGAAAGCCCAGAGACGCACGGAATACGCAGTATTTT	2	0.152091
TRBV28	TRBJ1-4	TRBC1	CASGRPLRQMTNEKLFF	TGTGCCAGTGGTCGGCCCCTCAGACAGATGACTAATGAAAAACTGTTTTTT	2	0.152091
TRBV5-1	TRBJ2-2	TRBC2	CASRERNTGELFF	TGCGCCAGCAGAGAGAGGAACACCGGGGAGCTGTTTTTT	2	0.152091
TRBV27	TRBJ2-1	TRBC2	CASRSQADRYNEQFF	TGTGCCAGCCGAAGTCAAGCGGACCGATACAATGAGCAGTTCTTC	2	0.152091
TRBV9	TRBJ2-7	TRBC2	CASSAPDRLYEQYF	TGTGCCAGCAGCGCACCGGACAGACTATACGAGCAGTACTTC	2	0.152091
TRBV28	TRBJ2-1	TRBC2	CASSAPGVAGDEQFF	TGTGCCAGCAGCGCCCCCGGGGTGGCTGGGGATGAGCAGTTCTTC	2	0.152091
TRBV2	TRBJ2-5	TRBC2	CASSDRWTQYF	TGTGCCAGCAGTGACAGGTGGACCCAGTACTTC	2	0.152091
TRBV2	TRBJ2-7	TRBC2	CASSELAGGPAYEQYF	TGTGCCAGCAGTGAACTAGCGGGGGGACCTGCCTACGAGCAGTACTTC	2	0.152091
TRBV5-1	TRBJ1-1	TRBC1	CASSFLGGGVNTEAFF	TGCGCCAGCAGCTTTCTCGGAGGGGGAGTGAACACTGAAGCTTTCTTT	2	0.152091
TRBV28	TRBJ2-7	TRBC2	CASSFPRQKPRSKQYF	TGTGCCAGCAGTTTTCCTCGACAGAAACCAAGGTCGAAGCAGTACTTC	2	0.152091
TRBV28	TRBJ2-5	TRBC2	CASSFRGGVYQETQYF	TGTGCCAGCAGTTTTCGGGGCGGGGTGTACCAAGAGACCCAGTACTTC	2	0.152091
TRBV5-6	TRBJ2-5	TRBC2	CASSFVGGETQYF	TGTGCCAGCAGCTTTGTCGGGGGGGAGACCCAGTACTTC	2	0.152091
TRBV7-2	TRBJ1-1	TRBC1	CASSFVNKGTEAFF	TGTGCCAGCAGCTTCGTCAATAAGGGGACTGAAGCTTTCTTT	2	0.152091
TRBV14	TRBJ1-1	TRBC1	CASSHGTVEAFF	TGTGCCAGCAGCCACGGGACAGTTGAAGCTTTCTTT	2	0.152091
TRBV7-3	TRBJ2-1	TRBC2	CASSKGLGTYDNEQFF	TGTGCCAGCAGCAAGGGACTAGGCACTTATGACAATGAGCAGTTCTTC	2	0.152091
TRBV7-9	TRBJ1-1	TRBC1	CASSLDRGDNEAFF	TGTGCCAGCAGCTTGGACAGGGGAGATAATGAAGCTTTCTTT	2	0.152091
TRBV28	TRBJ2-5	TRBC2	CASSLFGGVYQETQYF	TGTGCCAGCAGTTTATTCGGCGGGGTGTATCAAGAGACCCAGTACTTC	2	0.152091
TRBV28	TRBJ2-7	TRBC2	CASSLGGSLPEQYF	TGTGCCAGCAGTTTGGGGGGTTCTCTTCCCGAGCAGTACTTC	2	0.152091
TRBV7-9	TRBJ2-2	TRBC2	CASSLGPISPGELFF	TGTGCCAGCAGCTTAGGGCCTATCAGTCCCGGGGAGCTGTTTTTT	2	0.152091
TRBV27	TRBJ1-6	TRBC1	CASSLGQYNSPLHF	TGTGCCAGCAGTCTTGGACAGTATAATTCACCCCTCCACTTT	2	0.152091
TRBV7-7	TRBJ2-2	TRBC2	CASSLGRGTGELFF	TGTGCCAGCAGCTTAGGTCGGGGTACCGGGGAGCTGTTTTTT	2	0.152091
TRBV28	TRBJ1-1	TRBC1	CASSLGSDSHKLDTEAFF	TGTGCCAGCAGTTTAGGTTCGGACAGTCATAAATTGGACACTGAAGCTTTCTTT	2	0.152091
TRBV11-2	TRBJ1-3	TRBC1	CASSLISGNTIYF	TGTGCCAGCAGCTTGATTTCTGGAAACACCATATATTTT	2	0.152091
TRBV7-6	TRBJ2-1	TRBC2	CASSLLFLSPYNEQFF	TGTGCCAGCAGCTTACTGTTCCTTTCCCCCTACAATGAGCAGTTCTTC	2	0.152091
TRBV7-2	TRBJ2-1	TRBC2	CASSLLGLNEQFF	TGTGCCAGCAGCTTACTTGGACTCAATGAGCAGTTCTTC	2	0.152091
TRBV11-1	TRBJ1-1	TRBC1	CASSLLSTEAFF	TGTGCCAGCAGCTTATTGAGCACTGAAGCTTTCTTT	2	0.152091
TRBV28	TRBJ1-5	TRBC1	CASSLRGGTGGVWSNQPQHF	TGTGCCAGCAGTTTACGGGGTGGGACAGGGGGCGTTTGGAGCAATCAGCCCCAGCATTTT	2	0.152091
TRBV28	TRBJ1-1	TRBC1	CASSLSGVLRAFF	TGTGCCAGCAGTTTATCAGGAGTATTAAGAGCTTTCTTT	2	0.152091
TRBV7-2	TRBJ2-5	TRBC2	CASSLSISGGQETQYF	TGTGCCAGCAGCTTAAGTATTAGCGGGGGACAAGAGACCCAGTACTTC	2	0.152091
TRBV28	TRBJ1-2	TRBC1	CASSLTAFYGYTF	TGTGCCAGCAGTTTGACAGCTTTCTATGGCTACACCTTC	2	0.152091
TRBV5-8	TRBJ1-2	TRBC1	CASSLVIRQQLSYYYGYTF	TGTGCCAGCAGCTTGGTAATTAGGCAGCAACTTAGTTACTACTATGGCTACACCTTC	2	0.152091
TRBV19	TRBJ1-1	TRBC1	CASSNSRLGNTEAFF	TGTGCCAGTAGTAATTCAAGGCTAGGGAACACTGAAGCTTTCTTT	2	0.152091
TRBV18	TRBJ2-1	TRBC2	CASSPAIRQREFF	TGTGCCAGCTCACCTGCTATTAGACAGAGGGAGTTCTTC	2	0.152091
TRBV7-9	TRBJ2-1	TRBC2	CASSPEIEQFF	TGTGCCAGCAGCCCCGAAATCGAGCAGTTCTTC	2	0.152091
TRBV7-2	TRBJ2-7	TRBC2	CASSPGLAVSYEQYF	TGTGCCAGCAGCCCGGGACTAGCGGTCTCCTACGAGCAGTACTTC	2	0.152091
TRBV19	TRBJ1-3	TRBC1	CASSPLGFTIYF	TGTGCCAGTAGTCCCTTGGGGTTCACCATATATTTT	2	0.152091
TRBV9	TRBJ2-1	TRBC2	CASSPLGGGNTYNEQFF	TGTGCCAGCAGCCCCCTTGGAGGGGGAAATACCTACAATGAGCAGTTCTTC	2	0.152091
TRBV18	TRBJ2-2	TRBC2	CASSPQPGLAGPTGELFF	TGTGCCAGCTCACCACAACCGGGACTAGCGGGACCCACCGGGGAGCTGTTTTTT	2	0.152091
TRBV2	TRBJ1-6	TRBC1	CASSPRAGDYNSPLHF	TGTGCCAGCAGTCCACGGGCAGGAGATTATAATTCACCCCTCCACTTT	2	0.152091
TRBV9	TRBJ2-7	TRBC2	CASSPSGIPTYEQYF	TGTGCCAGCAGCCCCTCAGGGATTCCCACCTACGAGCAGTACTTC	2	0.152091
TRBV19	TRBJ2-1	TRBC2	CASSPVSGDEQFF	TGTGCCAGTAGTCCCGTTAGCGGGGATGAGCAGTTCTTC	2	0.152091
TRBV14	TRBJ2-1	TRBC2	CASSQIEGNEQFF	TGTGCCAGCAGCCAAATCGAGGGGAATGAGCAGTTCTTC	2	0.152091
TRBV7-9	TRBJ2-7	TRBC2	CASSRPGATYSYEQYF	TGTGCCAGCAGCCGACCTGGGGCGACATACTCCTACGAGCAGTACTTC	2	0.152091
TRBV11-2	TRBJ1-1	TRBC1	CASSRRTVWTEAFF	TGTGCCAGCAGCCGCCGAACTGTCTGGACTGAAGCTTTCTTT	2	0.152091
TRBV28	TRBJ1-2	TRBC1	CASSSGRLYGYTF	TGTGCCAGCAGTTCCGGGAGGTTATATGGCTACACCTTC	2	0.152091
TRBV5-1	TRBJ2-1	TRBC2	CASSSRLAGNNEQFF	TGCGCCAGCAGCTCTAGACTAGCGGGGAACAATGAGCAGTTCTTC	2	0.152091
TRBV5-4	TRBJ2-7	TRBC2	CASSSSGGADEQYF	TGTGCCAGCAGCTCTAGCGGGGGGGCAGACGAGCAGTACTTC	2	0.152091
TRBV6-4	TRBJ2-1	TRBC2	CASSSSRGGTRNEQFF	TGTGCCAGCAGTTCGAGTCGGGGGGGTACTAGGAATGAGCAGTTCTTC	2	0.152091
TRBV19	TRBJ1-4	TRBC1	CASSTPPGQDNEKLFF	TGTGCCAGTAGTACTCCGCCGGGACAGGATAATGAAAAACTGTTTTTT	2	0.152091
TRBV9	TRBJ2-2	TRBC2	CASSVASAGVDGELFF	TGTGCCAGCAGCGTAGCTTCAGCAGGGGTTGACGGGGAGCTGTTTTTT	2	0.152091
TRBV9	TRBJ1-2	TRBC1	CASSVDLLSIYGYTF	TGTGCCAGCAGCGTAGACCTTCTAAGTATCTATGGCTACACCTTC	2	0.152091
TRBV9	TRBJ2-7	TRBC2	CASSVDPLPSDEQYF	TGTGCCAGCAGCGTCGACCCTCTTCCTAGTGACGAGCAGTACTTC	2	0.152091
TRBV9	TRBJ1-4	TRBC1	CASSVHGGGGNEKLFF	TGTGCCAGCAGCGTACACGGTGGAGGGGGAAATGAAAAACTGTTTTTT	2	0.152091
TRBV2	TRBJ2-1	TRBC2	CASTGLAGLGWEQFF	TGTGCCAGCACTGGACTAGCGGGCCTGGGTTGGGAGCAGTTCTTC	2	0.152091
TRBV25-1	TRBJ1-2	TRBC1	CASTPGNLRHGYTF	TGTGCCAGCACCCCCGGGAACCTGCGACATGGCTACACCTTC	2	0.152091
TRBV19	TRBJ2-7	TRBC2	CASTYGTGTHEQYF	TGTGCCAGTACGTACGGGACAGGGACCCACGAGCAGTACTTC	2	0.152091
TRBV15	TRBJ1-5	TRBC1	CATRRAGTDNQPQHF	TGTGCCACCCGACGCGCCGGGACAGATAATCAGCCCCAGCATTTT	2	0.152091
TRBV24-1	TRBJ2-1	TRBC2	CATSRKGLSSYNEQFF	TGTGCCACCAGCCGAAAGGGGTTAAGCTCCTACAATGAGCAGTTCTTC	2	0.152091
TRBV30	TRBJ1-2	TRBC1	CAWRDRRYGYTF	TGTGCCTGGAGGGACAGGCGCTATGGCTACACCTTC	2	0.152091
TRBV30	TRBJ2-2	TRBC2	CAWSQGRIAGELFF	TGTGCCTGGTCTCAGGGAAGAATAGCCGGGGAGCTGTTTTTT	2	0.152091
TRBV20-1	TRBJ1-1	TRBC1	CSAPRGMGNTEAFF	TGCAGTGCCCCCAGGGGGATGGGGAACACTGAAGCTTTCTTT	2	0.152091
TRBV20-1	TRBJ1-2	TRBC1	CSAPSTGGYGYTF	TGCAGTGCACCATCGACAGGGGGTTATGGCTACACCTTC	2	0.152091
TRBV20-1	TRBJ1-2	TRBC1	CSAVTAPSGLGYGYTF	TGCAGTGCTGTGACAGCGCCGAGTGGACTTGGCTATGGCTACACCTTC	2	0.152091
TRBV29-1	TRBJ2-3	TRBC2	CSGGTFQDTQYF	TGCAGCGGAGGGACCTTCCAAGATACGCAGTATTTT	2	0.152091
TRBV29-1	TRBJ2-4	TRBC2	CSVRTPGWIQYF	TGCAGCGTTCGTACCCCAGGGTGGATTCAGTACTTC	2	0.152091
TRBV29-1	TRBJ2-3	TRBC2	CSVSAGPTDTQYF	TGCAGCGTTTCAGCGGGACCCACAGATACGCAGTATTTT	2	0.152091
TRBV29-1	TRBJ2-2	TRBC2	CSVSTGSTGELFF	TGCAGCGTATCGACAGGGTCCACCGGGGAGCTGTTTTTT	2	0.152091
TRBV2	TRBJ2-2	TRBC2	CASLADQNTGELFF	TGTGCCAGCCTAGCGGACCAAAACACCGGGGAGCTGTTTTTT	1	0.0760456
TRBV12-5	TRBJ2-5	TRBC2	CASRGVGETQYF	TGTGCTAGCAGGGGAGTTGGGGAGACCCAGTACTTC	1	0.0760456
TRBV11-2	TRBJ2-6	TRBC2	CASSFAGANVLTF	TGTGCCAGCAGCTTTGCAGGGGCCAACGTCCTGACTTTC	1	0.0760456
TRBV28	TRBJ2-7	TRBC2	CASSHSYEQYF	TGTGCCAGCAGTCACTCCTACGAGCAGTACTTC	1	0.0760456
TRBV19	TRBJ2-5	TRBC2	CASSIRSGETQYF	TGTGCCAGTAGTATAAGGTCCGGGGAGACCCAGTACTTC	1	0.0760456
TRBV11-2	TRBJ2-1	TRBC2	CASSLASYNEQFF	TGTGCCAGCAGCTTAGCCAGCTACAATGAGCAGTTCTTC	1	0.0760456
TRBV12-4	TRBJ2-7	TRBC2	CASSLESYEQYF	TGTGCCAGCAGTTTGGAAAGCTACGAGCAGTACTTC	1	0.0760456
TRBV7-3	TRBJ1-1	TRBC1	CASSLGLNTEAFF	TGTGCCAGCAGCTTGGGTTTGAACACTGAAGCTTTCTTT	1	0.0760456
TRBV7-2	TRBJ1-1	TRBC1	CASSLGQGAEAFF	TGTGCCAGCAGCTTGGGACAGGGGGCCGAAGCTTTCTTT	1	0.0760456
TRBV19	TRBJ2-7	TRBC2	CASSLRSSYEQYF	TGTGCCAGTAGTCTTCGGAGCTCCTACGAGCAGTACTTC	1	0.0760456
TRBV11-2	TRBJ2-7	TRBC2	CASSLTGYEQYF	TGTGCCAGCAGCTTGACTGGCTACGAGCAGTACTTC	1	0.0760456
TRBV7-2	TRBJ2-5	TRBC2	CASSLVETQYF	TGTGCCAGCAGCTTAGTGGAGACCCAGTACTTC	1	0.0760456
TRBV27	TRBJ2-3	TRBC2	CASSPGLGGTDTQYF	TGTGCCAGCAGTCCCGGACTAGGCGGTACAGATACGCAGTATTTT	1	0.0760456
TRBV7-3	TRBJ1-1	TRBC1	CASSPGPNTEAFF	TGTGCCAGCAGCCCCGGACCGAACACTGAAGCTTTCTTT	1	0.0760456
TRBV7-9	TRBJ1-1	TRBC1	CASSRDIEAFF	TGTGCCAGCAGCAGGGATATCGAAGCTTTCTTT	1	0.0760456
TRBV7-3	TRBJ2-7	TRBC2	CASSSDRGYEQYF	TGTGCCAGCAGCTCCGACAGGGGCTACGAGCAGTACTTC	1	0.0760456
TRBV11-2	TRBJ2-1	TRBC2	CASSSGPYNEQFF	TGTGCCAGCAGCTCCGGCCCCTACAATGAGCAGTTCTTC	1	0.0760456
TRBV11-3	TRBJ2-3	TRBC2	CASSSGTSTDTQYF	TGTGCCAGCAGCTCCGGGACTAGCACAGATACGCAGTATTTT	1	0.0760456
TRBV28	TRBJ2-7	TRBC2	CASSSIAGGPYEQYF	TGTGCCAGCAGTTCTATAGCGGGAGGGCCCTACGAGCAGTACTTC	1	0.0760456
TRBV11-2	TRBJ2-5	TRBC2	CASSTQGGGGETQYF	TGTGCCAGCAGCACGCAAGGAGGGGGAGGAGAGACCCAGTACTTC	1	0.0760456
TRBV9	TRBJ2-7	TRBC2	CASSVGDTYEQYF	TGTGCCAGCAGCGTAGGTGACACCTACGAGCAGTACTTC	1	0.0760456
TRBV30	TRBJ2-5	TRBC2	CACSGLAGQETQYF	TGTGCCTGCTCAGGACTAGCGGGCCAAGAGACCCAGTACTTC	1	0.0760456
TRBV5-1	TRBJ2-2	TRBC2	CAGGDSNTGELFF	TGCGCCGGGGGGGACAGCAACACCGGGGAGCTGTTTTTT	1	0.0760456
TRBV7-9	TRBJ2-1	TRBC2	CAIGPAPAEQFF	TGTGCCATAGGGCCAGCCCCCGCTGAGCAGTTCTTC	1	0.0760456
TRBV10-3	TRBJ1-2	TRBC1	CAIGRGQGPYGYTF	TGTGCCATCGGGCGGGGACAGGGCCCCTATGGCTACACCTTC	1	0.0760456
TRBV10-3	TRBJ2-7	TRBC2	CAIRPNGALVYEQYF	TGTGCCATCAGGCCAAACGGGGCTCTCGTATACGAGCAGTACTTC	1	0.0760456
TRBV10-3	TRBJ1-5	TRBC1	CAISAAGGNQPQHF	TGTGCCATCAGTGCGGCAGGGGGCAATCAGCCCCAGCATTTT	1	0.0760456
TRBV10-3	TRBJ2-3	TRBC2	CAISEGLEYTDTQYF	TGTGCCATCAGTGAGGGACTAGAGTACACAGATACGCAGTATTTT	1	0.0760456
TRBV10-3	TRBJ2-5	TRBC2	CAISEGPSSRPETQYF	TGTGCCATCAGTGAGGGACCCAGCTCGAGGCCTGAGACCCAGTACTTC	1	0.0760456
TRBV10-3	TRBJ2-5	TRBC2	CAISEPTGSNQETQYF	TGTGCCATCAGTGAGCCCACAGGGAGCAACCAAGAGACCCAGTACTTC	1	0.0760456
TRBV10-3	TRBJ2-5	TRBC2	CAISGFTEETQYF	TGTGCCATCAGTGGGTTCACAGAAGAGACCCAGTACTTC	1	0.0760456
TRBV10-3	TRBJ2-3	TRBC2	CAISGSTDTQYF	TGTGCCATATCTGGCAGCACAGATACGCAGTATTTT	1	0.0760456
TRBV10-3	TRBJ2-7	TRBC2	CAMGEGETEISYEQYF	TGTGCCATGGGGGAAGGAGAGACAGAGATCTCCTACGAGCAGTACTTC	1	0.0760456
TRBV28	TRBJ2-3	TRBC2	CARPGRVSDTQYF	TGTGCCAGGCCGGGACGGGTTTCAGATACGCAGTATTTT	1	0.0760456
TRBV2	TRBJ2-3	TRBC2	CARRGTPDTQYF	TGTGCCAGACGGGGGACCCCAGATACGCAGTATTTT	1	0.0760456
TRBV27	TRBJ2-7	TRBC2	CASAASGGNYEQYF	TGTGCCAGCGCAGCCTCAGGGGGTAACTACGAGCAGTACTTC	1	0.0760456
TRBV7-9	TRBJ1-1	TRBC1	CASAKGPVQAFF	TGTGCCAGCGCTAAGGGACCCGTACAAGCTTTCTTT	1	0.0760456
TRBV19	TRBJ1-5	TRBC1	CASATEWSNQPQHF	TGTGCCAGTGCCACCGAGTGGTCCAATCAGCCCCAGCATTTT	1	0.0760456
TRBV2	TRBJ2-7	TRBC2	CASEGGVPLSYEQYF	TGTGCCAGCGAGGGAGGGGTCCCCCTCTCCTACGAGCAGTACTTC	1	0.0760456
TRBV9	TRBJ1-3	TRBC1	CASERGSGNTIYF	TGTGCCAGCGAGAGGGGATCTGGAAACACCATATATTTT	1	0.0760456
TRBV28	TRBJ2-2	TRBC2	CASFTRDRGIQGTGELFF	TGTGCCAGCTTTACCCGGGACAGGGGGATTCAGGGCACCGGGGAGCTGTTTTTT	1	0.0760456
TRBV10-2	TRBJ1-2	TRBC1	CASGDLQGVWHGYTF	TGCGCCAGCGGCGACTTACAGGGGGTTTGGCATGGCTACACCTTC	1	0.0760456
TRBV5-1	TRBJ2-2	TRBC2	CASGEENTGELFF	TGCGCCAGCGGGGAGGAAAACACCGGGGAGCTGTTTTTT	1	0.0760456
TRBV2	TRBJ2-7	TRBC2	CASGGQGVSEQYF	TGTGCCAGCGGAGGACAGGGCGTCTCCGAGCAGTACTTC	1	0.0760456
TRBV13	TRBJ2-7	TRBC2	CASGIFKAGEQYF	TGTGCCAGCGGGATTTTCAAAGCGGGTGAGCAGTACTTC	1	0.0760456
TRBV12-5	TRBJ1-1	TRBC1	CASGLGQRNTEAFF	TGTGCTAGTGGTTTGGGACAGAGGAACACTGAAGCTTTCTTT	1	0.0760456
TRBV19	TRBJ1-6	TRBC1	CASGPAGSSYNSPLHF	TGTGCCAGTGGACCGGCGGGGAGCTCCTATAATTCACCCCTCCACTTT	1	0.0760456
TRBV28	TRBJ2-5	TRBC2	CASGQARGGETQYF	TGTGCCAGCGGACAGGCCCGCGGGGGAGAGACCCAGTACTTC	1	0.0760456
TRBV27	TRBJ1-2	TRBC1	CASGQGGPGYGYTF	TGTGCCAGCGGACAGGGGGGGCCAGGCTATGGCTACACCTTC	1	0.0760456
TRBV30	TRBJ2-5	TRBC2	CASGTRGETQYF	TGTGCGTCCGGGACTAGGGGGGAGACCCAGTACTTC	1	0.0760456
TRBV28	TRBJ2-7	TRBC2	CASKAGGNPYEQYF	TGTGCCAGCAAAGCGGGAGGAAATCCCTACGAGCAGTACTTC	1	0.0760456
TRBV2	TRBJ2-7	TRBC2	CASKGGLAYEQYF	TGTGCCAGCAAGGGGGGGCTGGCCTACGAGCAGTACTTC	1	0.0760456
TRBV7-9	TRBJ2-3	TRBC2	CASKLGVNTDTQYF	TGTGCCAGCAAGCTCGGGGTCAACACAGATACGCAGTATTTT	1	0.0760456
TRBV2	TRBJ2-3	TRBC2	CASKRTAKSTDTQYF	TGTGCCAGCAAACGGACAGCTAAGAGCACAGATACGCAGTATTTT	1	0.0760456
TRBV2	TRBJ1-5	TRBC1	CASKVGPIGNQPQHF	TGTGCCAGCAAGGTTGGACCTATCGGCAATCAGCCCCAGCATTTT	1	0.0760456
TRBV28	TRBJ1-2	TRBC1	CASLEMQGRNYGYTF	TGTGCCAGCCTCGAGATGCAGGGGAGAAACTATGGCTACACCTTC	1	0.0760456
TRBV27	TRBJ2-7	TRBC2	CASMALLGGASEQYF	TGTGCCAGCATGGCCCTACTTGGGGGGGCGAGCGAGCAGTACTTC	1	0.0760456
TRBV6-2	TRBJ2-7	TRBC2	CASMLAGAYEQYF	TGTGCCAGCATGCTCGCGGGAGCCTACGAGCAGTACTTC	1	0.0760456
TRBV28	TRBJ1-2	TRBC1	CASNGLSYGYTF	TGTGCCAGCAACGGGTTAAGCTATGGCTACACCTTC	1	0.0760456
TRBV2	TRBJ1-5	TRBC1	CASNLEHINQPQHF	TGTGCCAGCAACCTAGAACATATCAATCAGCCCCAGCATTTT	1	0.0760456
TRBV28	TRBJ2-7	TRBC2	CASNRGAAYEQYF	TGTGCCAGCAATCGCGGGGCGGCCTACGAGCAGTACTTC	1	0.0760456
TRBV28	TRBJ2-7	TRBC2	CASNRGGASEQYF	TGTGCCAGCAACAGGGGGGGGGCCAGCGAGCAGTACTTC	1	0.0760456
TRBV6-4	TRBJ1-2	TRBC1	CASNTKPTGVGYTF	TGTGCCAGCAATACGAAACCGACGGGGGTCGGCTACACCTTC	1	0.0760456
TRBV7-6	TRBJ2-1	TRBC2	CASQLDSGSAYNEQFF	TGTGCCAGCCAACTTGATAGCGGGAGTGCGTACAATGAGCAGTTCTTC	1	0.0760456
TRBV12-4	TRBJ2-3	TRBC2	CASRAQGTQYF	TGTGCCAGCAGGGCCCAAGGTACGCAGTATTTT	1	0.0760456
TRBV11-3	TRBJ1-2	TRBC1	CASRDGAGGYTF	TGTGCCAGCAGAGACGGGGCCGGCGGCTACACCTTC	1	0.0760456
TRBV27	TRBJ1-1	TRBC1	CASRDGGLNTEAFF	TGTGCCAGCAGGGACGGAGGTCTGAACACTGAAGCTTTCTTT	1	0.0760456
TRBV25-1	TRBJ1-2	TRBC1	CASRDNRFYGYTF	TGTGCCAGCAGAGATAATCGGTTCTATGGCTACACCTTC	1	0.0760456
TRBV6-2	TRBJ2-7	TRBC2	CASRGLGQGVGYEQYF	TGTGCCAGCAGAGGGCTCGGACAGGGTGTGGGATACGAGCAGTACTTC	1	0.0760456
TRBV27	TRBJ2-1	TRBC2	CASRGVAGGAWEQFF	TGTGCCAGCAGGGGCGTCGCGGGGGGTGCTTGGGAGCAGTTCTTC	1	0.0760456
TRBV2	TRBJ1-6	TRBC1	CASRIDRPNLYNSPLHF	TGTGCCAGCAGGATAGACAGGCCCAACCTATATAATTCACCCCTCCACTTT	1	0.0760456
TRBV2	TRBJ2-7	TRBC2	CASRKEAGGPREQYF	TGTGCCAGCAGGAAGGAAGCGGGGGGGCCGAGGGAGCAGTACTTC	1	0.0760456
TRBV13	TRBJ1-6	TRBC1	CASRLKGAQNSPLHF	TGTGCCAGCAGACTAAAAGGGGCCCAAAATTCACCCCTCCACTTT	1	0.0760456
TRBV11-2	TRBJ2-1	TRBC2	CASRPFGYGGVGDEQFF	TGTGCCAGCAGACCCTTCGGGTATGGCGGTGTGGGCGATGAGCAGTTCTTC	1	0.0760456
TRBV12-3	TRBJ1-5	TRBC1	CASRPGLGTATNQPQHF	TGTGCCAGCAGGCCGGGCTTAGGGACGGCAACTAATCAGCCCCAGCATTTT	1	0.0760456
TRBV5-1	TRBJ2-7	TRBC2	CASRPGLYYEQYF	TGCGCCAGCAGACCTGGACTCTACTACGAGCAGTACTTC	1	0.0760456
TRBV5-4	TRBJ1-2	TRBC1	CASRPGTGGKANYGYTF	TGTGCCAGCAGACCCGGGACAGGGGGCAAAGCTAACTATGGCTACACCTTC	1	0.0760456
TRBV28	TRBJ1-2	TRBC1	CASRPITGTQNYGYTF	TGTGCCAGCAGACCAATCACCGGGACACAAAACTATGGCTACACCTTC	1	0.0760456
TRBV5-6	TRBJ2-4	TRBC2	CASRQTVNANIQYF	TGTGCCAGCAGACAGACCGTGAATGCAAACATTCAGTACTTC	1	0.0760456
TRBV5-1	TRBJ2-2	TRBC2	CASRRGGALTPNTGELFF	TGCGCCAGCAGGAGGGGGGGCGCATTAACCCCGAACACCGGGGAGCTGTTTTTT	1	0.0760456
TRBV19	TRBJ2-5	TRBC2	CASRRGTGLQETQYF	TGTGCCAGTAGACGAGGGACAGGGCTACAAGAGACCCAGTACTTC	1	0.0760456
TRBV5-4	TRBJ1-4	TRBC1	CASRRQGTNEKLFF	TGTGCCAGCAGGCGACAGGGGACTAATGAAAAACTGTTTTTT	1	0.0760456
TRBV7-2	TRBJ2-7	TRBC2	CASRSLAGSYEQYF	TGTGCCAGCCGCTCCCTGGCGGGGTCCTACGAGCAGTACTTC	1	0.0760456
TRBV28	TRBJ1-2	TRBC1	CASRTGHYGYTF	TGTGCCAGCAGAACTGGGCACTATGGCTACACCTTC	1	0.0760456
TRBV2	TRBJ2-7	TRBC2	CASRVGTGAPYEQYF	TGTGCCAGCAGGGTTGGGACAGGGGCTCCCTACGAGCAGTACTTC	1	0.0760456
TRBV5-1	TRBJ2-2	TRBC2	CASRYHEAGELFF	TGCGCCAGCAGGTACCATGAGGCCGGGGAGCTGTTTTTT	1	0.0760456
TRBV18	TRBJ2-2	TRBC2	CASSADMNTGELFF	TGTGCCAGCTCAGCCGACATGAACACCGGGGAGCTGTTTTTT	1	0.0760456
TRBV11-2	TRBJ2-1	TRBC2	CASSADYQPYNEQFF	TGTGCCAGCAGCGCGGACTACCAGCCGTACAATGAGCAGTTCTTC	1	0.0760456
TRBV9	TRBJ2-5	TRBC2	CASSAGGGGLYQETQYF	TGTGCCAGCAGCGCCGGAGGAGGGGGACTATACCAAGAGACCCAGTACTTC	1	0.0760456
TRBV9	TRBJ2-3	TRBC2	CASSAGLRGTDTQYF	TGTGCCAGCAGCGCTGGACTAAGGGGCACAGATACGCAGTATTTT	1	0.0760456
TRBV5-1	TRBJ2-5	TRBC2	CASSAGQGTQYF	TGCGCCAGCAGCGCCGGACAGGGGACCCAGTACTTC	1	0.0760456
TRBV18	TRBJ2-3	TRBC2	CASSAIAGTDTQYF	TGTGCCAGCTCAGCAATAGCGGGCACAGATACGCAGTATTTT	1	0.0760456
TRBV9	TRBJ1-6	TRBC1	CASSALDSIHSPLHF	TGTGCCAGCAGCGCCTTGGACAGTATCCATTCACCCCTCCACTTT	1	0.0760456
TRBV7-3	TRBJ2-3	TRBC2	CASSAQGRPNTDTQYF	TGTGCCAGCAGCGCTCAGGGTAGACCGAACACAGATACGCAGTATTTT	1	0.0760456
TRBV7-9	TRBJ1-1	TRBC1	CASSARGLDTEAFF	TGTGCCAGCAGCGCTAGGGGGCTCGACACTGAAGCTTTCTTT	1	0.0760456
TRBV11-2	TRBJ2-3	TRBC2	CASSASQLAGGTDTQYF	TGTGCCAGCAGCGCCAGCCAACTAGCGGGAGGAACAGATACGCAGTATTTT	1	0.0760456
TRBV18	TRBJ1-4	TRBC1	CASSATIGQSNEKLFF	TGTGCCAGCTCAGCAACTATCGGACAGAGCAATGAAAAACTGTTTTTT	1	0.0760456
TRBV2	TRBJ2-2	TRBC2	CASSDLNGGELFF	TGTGCCAGCAGTGATTTGAATGGCGGGGAGCTGTTTTTT	1	0.0760456
TRBV9	TRBJ1-2	TRBC1	CASSDPGGARGYTF	TGTGCCAGCAGCGATCCAGGGGGCGCGAGGGGCTACACCTTC	1	0.0760456
TRBV6-4	TRBJ1-1	TRBC1	CASSDQPGSEAFF	TGTGCCAGCAGTGACCAACCGGGAAGTGAAGCTTTCTTT	1	0.0760456
TRBV12-4	TRBJ1-2	TRBC1	CASSDRDRRYTF	TGTGCCAGCAGTGACAGGGATCGACGCTACACCTTC	1	0.0760456
TRBV6-1	TRBJ2-1	TRBC2	CASSDSEGPYNEQFF	TGTGCCAGCAGTGATAGCGAGGGACCCTACAATGAGCAGTTCTTC	1	0.0760456
TRBV28	TRBJ2-1	TRBC2	CASSDSGTGGAGEQFF	TGTGCCAGCAGTGACTCTGGGACAGGGGGCGCGGGGGAGCAGTTCTTC	1	0.0760456
TRBV7-9	TRBJ1-2	TRBC1	CASSDSRYSGVSYGYTF	TGTGCCAGCAGCGACTCCCGATACTCGGGAGTCAGCTATGGCTACACCTTC	1	0.0760456
TRBV9	TRBJ1-1	TRBC1	CASSDSSGMNTEAFF	TGTGCCAGCAGCGATTCGTCGGGGATGAACACTGAAGCTTTCTTT	1	0.0760456
TRBV6-4	TRBJ2-3	TRBC2	CASSDSTSGADTQYF	TGTGCCAGCAGTGACTCGACTAGCGGGGCAGATACGCAGTATTTT	1	0.0760456
TRBV7-9	TRBJ1-1	TRBC1	CASSDTGGEAFF	TGTGCCAGCAGTGATACAGGGGGTGAAGCTTTCTTT	1	0.0760456
TRBV10-2	TRBJ1-3	TRBC1	CASSDTINSGNTIYF	TGCGCCAGCAGTGATACTATTAACTCTGGAAACACCATATATTTT	1	0.0760456
TRBV10-2	TRBJ2-7	TRBC2	CASSEDGLNYEQYF	TGCGCCAGCAGTGAGGACGGACTCAACTACGAGCAGTACTTC	1	0.0760456
TRBV28	TRBJ2-7	TRBC2	CASSEGLDYEQYF	TGTGCCAGCAGTGAAGGACTCGACTACGAGCAGTACTTC	1	0.0760456
TRBV14	TRBJ2-1	TRBC2	CASSEGTNRINEQFF	TGTGCCAGCAGCGAAGGGACTAACCGCATTAATGAGCAGTTCTTC	1	0.0760456
TRBV25-1	TRBJ1-4	TRBC1	CASSEIGHNEKLFF	TGTGCCAGCAGTGAAATTGGCCACAATGAAAAACTGTTTTTT	1	0.0760456
TRBV9	TRBJ2-4	TRBC2	CASSELAGAKNIQYF	TGTGCCAGCAGCGAACTAGCGGGAGCCAAAAACATTCAGTACTTC	1	0.0760456
TRBV7-4	TRBJ2-3	TRBC2	CASSEQGAHLDTQYF	TGTGCCAGCAGCGAACAGGGGGCGCATTTGGATACGCAGTATTTT	1	0.0760456
TRBV10-2	TRBJ1-5	TRBC1	CASSEQGNQPQHF	TGCGCCAGCAGTGAGCAGGGGAATCAGCCCCAGCATTTT	1	0.0760456
TRBV6-1	TRBJ2-3	TRBC2	CASSETGTTDTQYF	TGTGCCAGCAGTGAAACAGGGACCACAGATACGCAGTATTTT	1	0.0760456
TRBV6-4	TRBJ2-1	TRBC2	CASSETSGNYNEQFF	TGTGCCAGCAGTGAAACTAGCGGTAACTACAATGAGCAGTTCTTC	1	0.0760456
TRBV3-1	TRBJ2-3	TRBC2	CASSEWGSSTDTQYF	TGTGCCAGCAGCGAATGGGGATCTAGCACAGATACGCAGTATTTT	1	0.0760456
TRBV27	TRBJ2-1	TRBC2	CASSFATSGSINNEQFF	TGTGCCAGCAGTTTCGCTACTAGCGGGAGTATCAACAATGAGCAGTTCTTC	1	0.0760456
TRBV7-2	TRBJ1-1	TRBC1	CASSFFVQGPAMNTEAFF	TGTGCCAGCAGCTTTTTTGTACAGGGCCCTGCCATGAACACTGAAGCTTTCTTT	1	0.0760456
TRBV27	TRBJ1-5	TRBC1	CASSFGPYRGLNQPQHF	TGTGCCAGCAGTTTCGGACCCTACAGGGGGCTTAATCAGCCCCAGCATTTT	1	0.0760456
TRBV11-2	TRBJ1-5	TRBC1	CASSFGRDQPQHF	TGTGCCAGCAGCTTCGGGAGGGATCAGCCCCAGCATTTT	1	0.0760456
TRBV11-2	TRBJ1-2	TRBC1	CASSFPSGYGYTF	TGTGCCAGCAGCTTCCCCTCAGGCTATGGCTACACCTTC	1	0.0760456
TRBV7-9	TRBJ2-1	TRBC2	CASSFQYNEQFF	TGTGCCAGCAGCTTTCAGTACAATGAGCAGTTCTTC	1	0.0760456
TRBV11-2	TRBJ2-2	TRBC2	CASSFRASTGELFF	TGTGCCAGCAGCTTCCGCGCGTCCACCGGGGAGCTGTTTTTT	1	0.0760456
TRBV12-4	TRBJ2-7	TRBC2	CASSFSGIRVDEQYF	TGTGCCAGCAGTTTCTCCGGGATCAGGGTCGACGAGCAGTACTTC	1	0.0760456
TRBV28	TRBJ2-3	TRBC2	CASSFVSGTDTQYF	TGTGCCAGCAGTTTTGTTTCAGGAACAGATACGCAGTATTTT	1	0.0760456
TRBV5-1	TRBJ2-7	TRBC2	CASSGEWSYEQYF	TGCGCCAGTAGCGGGGAATGGTCCTACGAGCAGTACTTC	1	0.0760456
TRBV25-1	TRBJ1-6	TRBC1	CASSGGTGVVGSPLHF	TGTGCCAGCAGTGGAGGGACAGGGGTGGTGGGTTCACCCCTCCACTTT	1	0.0760456
TRBV25-1	TRBJ2-2	TRBC2	CASSGGWGTPGELFF	TGTGCCAGCAGTGGGGGGTGGGGTACCCCCGGGGAGCTGTTTTTT	1	0.0760456
TRBV9	TRBJ2-2	TRBC2	CASSGLAGGELFF	TGTGCCAGCTCGGGGCTAGCCGGCGGGGAGCTGTTTTTT	1	0.0760456
TRBV7-9	TRBJ1-1	TRBC1	CASSGLVVLGAFF	TGTGCCAGCAGCGGACTAGTGGTATTAGGAGCTTTCTTT	1	0.0760456
TRBV13	TRBJ1-6	TRBC1	CASSGPEGENSPLHF	TGTGCCAGCAGCGGCCCGGAGGGGGAGAATTCACCCCTCCACTTT	1	0.0760456
TRBV19	TRBJ2-7	TRBC2	CASSGRASYEQYF	TGTGCCAGTAGCGGCAGGGCCTCCTACGAGCAGTACTTC	1	0.0760456
TRBV7-2	TRBJ1-2	TRBC1	CASSGSAGNYGYTF	TGTGCCAGCAGCGGGTCTGCGGGAAACTATGGCTACACCTTC	1	0.0760456
TRBV7-3	TRBJ1-5	TRBC1	CASSGSGTGVQPQHF	TGTGCCAGCAGCGGATCCGGGACAGGGGTTCAGCCCCAGCATTTT	1	0.0760456
TRBV5-1	TRBJ2-1	TRBC2	CASSGTGSVNEQFF	TGCGCCAGCAGTGGAACAGGTTCTGTCAATGAGCAGTTCTTC	1	0.0760456
TRBV27	TRBJ2-7	TRBC2	CASSGTSGSSYEQYF	TGTGCCAGCAGCGGGACTAGCGGGAGCTCCTACGAGCAGTACTTC	1	0.0760456
TRBV11-2	TRBJ2-7	TRBC2	CASSGVAGGDKDEQYF	TGTGCCAGCAGCGGGGTAGCGGGAGGAGATAAGGACGAGCAGTACTTC	1	0.0760456
TRBV25-1	TRBJ2-5	TRBC2	CASSGWTPGQETQYF	TGTGCCAGCAGTGGGTGGACACCGGGGCAAGAGACCCAGTACTTC	1	0.0760456
TRBV3-1	TRBJ1-5	TRBC1	CASSHGGGNQPQHF	TGTGCCAGCAGCCATGGAGGGGGCAATCAGCCCCAGCATTTT	1	0.0760456
TRBV3-1	TRBJ2-7	TRBC2	CASSHGTVGVYEQYF	TGTGCCAGCAGCCACGGGACAGTCGGGGTCTACGAGCAGTACTTC	1	0.0760456
TRBV5-1	TRBJ2-3	TRBC2	CASSHQASTDTQYF	TGCGCCAGCAGCCACCAGGCAAGCACAGATACGCAGTATTTT	1	0.0760456
TRBV18	TRBJ2-3	TRBC2	CASSIAGAQHTDTQYF	TGTGCCAGCTCAATAGCGGGAGCCCAACACACAGATACGCAGTATTTT	1	0.0760456
TRBV19	TRBJ2-5	TRBC2	CASSIAGRGAAAQETQYF	TGTGCCAGTAGTATAGCAGGACGGGGGGCGGCGGCCCAAGAGACCCAGTACTTC	1	0.0760456
TRBV19	TRBJ2-1	TRBC2	CASSIASGHLNEQFF	TGTGCCAGTAGTATAGCTAGCGGCCACCTCAATGAGCAGTTCTTC	1	0.0760456
TRBV19	TRBJ1-5	TRBC1	CASSIFGSIKAGAPQHF	TGTGCCAGTAGTATTTTTGGAAGTATCAAGGCCGGCGCGCCCCAGCATTTT	1	0.0760456
TRBV25-1	TRBJ2-1	TRBC2	CASSIGGGTAYNEQFF	TGTGCCAGCAGTATTGGGGGTGGGACAGCCTACAATGAGCAGTTCTTC	1	0.0760456
TRBV28	TRBJ2-3	TRBC2	CASSIGLAGAPDTQYF	TGTGCCAGCAGTATAGGACTAGCGGGGGCCCCAGATACGCAGTATTTT	1	0.0760456
TRBV19	TRBJ1-1	TRBC1	CASSIGVLNTEAFF	TGTGCCAGTAGTATTGGAGTCTTGAACACTGAAGCTTTCTTT	1	0.0760456
TRBV19	TRBJ2-3	TRBC2	CASSIPSRSDTQYF	TGTGCCAGTAGTATACCGTCAAGGTCAGATACGCAGTATTTT	1	0.0760456
TRBV19	TRBJ2-5	TRBC2	CASSIQGGKETQYF	TGTGCCAGTAGTATTCAAGGGGGTAAAGAGACCCAGTACTTC	1	0.0760456
TRBV13	TRBJ2-3	TRBC2	CASSISGSPDTQYF	TGTGCCAGCAGCATTAGCGGGAGTCCAGATACGCAGTATTTT	1	0.0760456
TRBV5-4	TRBJ2-7	TRBC2	CASSISGTGTYEQYF	TGTGCCAGCAGTATCTCCGGGACAGGGACCTACGAGCAGTACTTC	1	0.0760456
TRBV19	TRBJ2-5	TRBC2	CASSISVGRETQYF	TGTGCCAGTAGTATTTCGGTGGGGAGGGAGACCCAGTACTTC	1	0.0760456
TRBV19	TRBJ2-3	TRBC2	CASSIWGGVVTDTQYF	TGTGCCAGTAGTATTTGGGGAGGGGTAGTCACAGATACGCAGTATTTT	1	0.0760456
TRBV5-6	TRBJ2-3	TRBC2	CASSIWLRTDTQYF	TGTGCCAGCAGCATCTGGTTACGCACAGATACGCAGTATTTT	1	0.0760456
TRBV18	TRBJ2-1	TRBC2	CASSIYGGEQFF	TGTGCCAGCTCCATATACGGCGGGGAGCAGTTCTTC	1	0.0760456
TRBV28	TRBJ2-7	TRBC2	CASSKSGTAVYEQYF	TGTGCCAGCAGCAAGTCCGGGACAGCTGTCTACGAGCAGTACTTC	1	0.0760456
TRBV19	TRBJ1-1	TRBC1	CASSKTGRAFF	TGTGCCAGTAGCAAGACAGGGCGAGCTTTCTTT	1	0.0760456
TRBV13	TRBJ2-7	TRBC2	CASSLAGIYEQYF	TGTGCCAGCAGCTTAGCAGGGATCTACGAGCAGTACTTC	1	0.0760456
TRBV11-2	TRBJ2-3	TRBC2	CASSLAGQGAADTQYF	TGTGCCAGCAGCTTAGCGGGACAGGGGGCAGCGGATACGCAGTATTTT	1	0.0760456
TRBV5-6	TRBJ1-1	TRBC1	CASSLALRQLNTEAFF	TGTGCCAGCAGCTTGGCCCTCAGACAGTTGAACACTGAAGCTTTCTTT	1	0.0760456
TRBV7-2	TRBJ2-5	TRBC2	CASSLANRFWETQYF	TGTGCCAGCAGCTTAGCGAACAGGTTCTGGGAGACCCAGTACTTC	1	0.0760456
TRBV28	TRBJ2-5	TRBC2	CASSLARREKETQYF	TGTGCCAGCAGTTTAGCGCGGAGGGAAAAAGAGACCCAGTACTTC	1	0.0760456
TRBV5-1	TRBJ2-1	TRBC2	CASSLASGGAWDEQFF	TGCGCCAGCAGCTTGGCGAGCGGGGGGGCCTGGGATGAGCAGTTCTTC	1	0.0760456
TRBV5-6	TRBJ2-3	TRBC2	CASSLAWGTDTQYF	TGTGCCAGCAGCTTGGCCTGGGGCACAGATACGCAGTATTTT	1	0.0760456
TRBV7-7	TRBJ2-3	TRBC2	CASSLDATDTQYF	TGTGCCAGCAGCTTAGACGCCACAGATACGCAGTATTTT	1	0.0760456
TRBV7-8	TRBJ2-1	TRBC2	CASSLDFGSNEQFF	TGTGCCAGCAGTCTCGATTTCGGAAGCAATGAGCAGTTCTTC	1	0.0760456
TRBV7-9	TRBJ2-1	TRBC2	CASSLDLGAGMNEQFF	TGTGCCAGCAGCTTAGATCTGGGGGCGGGGATGAATGAGCAGTTCTTC	1	0.0760456
TRBV7-9	TRBJ1-4	TRBC1	CASSLDLSGEKLFF	TGTGCCAGCAGCCTGGACCTTTCAGGTGAAAAACTGTTTTTT	1	0.0760456
TRBV7-2	TRBJ1-2	TRBC1	CASSLDQAPLYGYTF	TGTGCCAGCAGCTTAGACCAGGCCCCCCTCTATGGCTACACCTTC	1	0.0760456
TRBV5-6	TRBJ1-1	TRBC1	CASSLDSRGPEAFF	TGTGCCAGCAGCTTGGATTCCAGGGGCCCTGAAGCTTTCTTT	1	0.0760456
TRBV5-1	TRBJ2-7	TRBC2	CASSLEAQRQVTYEQYF	TGCGCCAGCAGCTTGGAGGCCCAAAGACAGGTGACCTACGAGCAGTACTTC	1	0.0760456
TRBV7-2	TRBJ1-6	TRBC1	CASSLESQGLGSPLHF	TGTGCCAGCAGCTTAGAGTCCCAGGGCTTGGGGTCACCCCTCCACTTT	1	0.0760456
TRBV7-9	TRBJ2-5		CASSLEVFKETQYF	TGTGCCAGCAGCTTAGAGGTCTTCAAAGAGACCCAGTACTTC	1	0.0760456
TRBV11-2	TRBJ2-6	TRBC2	CASSLEVKRGGSGANVLTF	TGTGCCAGCAGCTTAGAAGTCAAGCGGGGGGGGTCTGGGGCCAACGTCCTGACTTTC	1	0.0760456
TRBV27	TRBJ2-5	TRBC2	CASSLFANLGETQYF	TGTGCCAGCAGTTTATTCGCAAACTTAGGAGAGACCCAGTACTTC	1	0.0760456
TRBV7-7	TRBJ2-5	TRBC2	CASSLGARDRGETQYF	TGTGCTAGCAGCTTAGGCGCGCGGGACAGGGGCGAGACCCAGTACTTC	1	0.0760456
TRBV7-9	TRBJ2-3	TRBC2	CASSLGDRDTDTQYF	TGTGCCAGCAGCTTAGGGGACAGAGACACAGATACGCAGTATTTT	1	0.0760456
TRBV3-1	TRBJ2-7	TRBC2	CASSLGFLNEQYF	TGTGCCAGCAGCCTTGGGTTTTTGAACGAGCAGTACTTC	1	0.0760456
TRBV13	TRBJ2-7	TRBC2	CASSLGGQDSEQYF	TGTGCCAGCAGCTTAGGAGGCCAAGACAGCGAGCAGTACTTC	1	0.0760456
TRBV7-2	TRBJ2-3	TRBC2	CASSLGGRALVDTQYF	TGTGCCAGCAGCTTAGGTGGGAGGGCCTTGGTAGATACGCAGTATTTT	1	0.0760456
TRBV7-9	TRBJ2-7	TRBC2	CASSLGGTAEQYF	TGTGCCAGCAGCTTAGGGGGGACAGCCGAGCAGTACTTC	1	0.0760456
TRBV5-4	TRBJ2-5	TRBC2	CASSLGLAGAETQYF	TGTGCCAGCAGCCTCGGACTAGCGGGAGCAGAGACCCAGTACTTC	1	0.0760456
TRBV7-9	TRBJ1-3	TRBC1	CASSLGLLQETSGNTIYF	TGTGCCAGCAGCTTAGGACTACTACAGGAGACCTCTGGAAACACCATATATTTT	1	0.0760456
TRBV7-9	TRBJ2-4	TRBC2	CASSLGNRDIQYF	TGTGCCAGCAGCTTAGGAAATCGCGACATTCAGTACTTC	1	0.0760456
TRBV3-1	TRBJ2-3	TRBC2	CASSLGNRGGIDTQYF	TGTGCCAGCAGCCTAGGGAACAGGGGGGGAATAGATACGCAGTATTTT	1	0.0760456
TRBV7-6	TRBJ2-6	TRBC2	CASSLGSGPWVGANVLTF	TGTGCCAGCAGCTTAGGGTCAGGCCCATGGGTTGGGGCCAACGTCCTGACTTTC	1	0.0760456
TRBV19	TRBJ1-2	TRBC1	CASSLGTAPGGGYTF	TGTGCCAGTAGCCTGGGGACAGCACCTGGGGGTGGCTACACCTTC	1	0.0760456
TRBV27	TRBJ2-7	TRBC2	CASSLGTSGTYEQYF	TGTGCCAGCAGTTTAGGGACTAGCGGGACCTACGAGCAGTACTTC	1	0.0760456
TRBV7-9	TRBJ2-1	TRBC2	CASSLGVEYGEQFF	TGTGCCAGCAGCCTGGGGGTCGAGTACGGTGAGCAGTTCTTC	1	0.0760456
TRBV11-2	TRBJ2-3	TRBC2	CASSLGVRAGSYWDTQYF	TGTGCCAGCAGCTTAGGGGTGCGGGCAGGGTCTTACTGGGATACGCAGTATTTT	1	0.0760456
TRBV27	TRBJ2-2	TRBC2	CASSLGVYTGELFF	TGTGCCAGCAGTTTAGGAGTGTACACCGGGGAGCTGTTTTTT	1	0.0760456
TRBV28	TRBJ1-2	TRBC1	CASSLIQGGGYTF	TGTGCCAGCAGTTTAATACAGGGAGGTGGCTACACCTTC	1	0.0760456
TRBV28	TRBJ2-5	TRBC2	CASSLISSGEQETQYF	TGTGCCAGCAGTTTAATCTCTAGCGGGGAGCAAGAGACCCAGTACTTC	1	0.0760456
TRBV11-2	TRBJ2-3	TRBC2	CASSLKDRPTDTQYF	TGTGCCAGCAGCTTAAAGGACAGACCCACAGATACGCAGTATTTT	1	0.0760456
TRBV27	TRBJ1-2	TRBC1	CASSLKQGGNYGYTF	TGTGCCAGCAGTTTGAAACAGGGGGGTAACTATGGCTACACCTTC	1	0.0760456
TRBV27	TRBJ2-7	TRBC2	CASSLKSALAETYEQYF	TGTGCCAGCAGTTTAAAGTCCGCGCTAGCGGAAACCTACGAGCAGTACTTC	1	0.0760456
TRBV19	TRBJ2-4	TRBC2	CASSLLDEGTKNIQYF	TGTGCCAGTAGCCTACTAGACGAAGGTACCAAAAACATTCAGTACTTC	1	0.0760456
TRBV6-2	TRBJ2-1	TRBC2	CASSLLGRETDEQFF	TGTGCCAGCAGTCTACTGGGGCGGGAGACCGATGAGCAGTTCTTC	1	0.0760456
TRBV28	TRBJ1-2	TRBC1	CASSLMTGGGYGYTF	TGTGCCAGCAGTTTAATGACAGGGGGCGGCTATGGCTACACCTTC	1	0.0760456
TRBV11-2	TRBJ2-3	TRBC2	CASSLNPQASTDTQYF	TGTGCCAGCAGCCTCAACCCCCAGGCGAGCACAGATACGCAGTATTTT	1	0.0760456
TRBV7-3	TRBJ2-1	TRBC2	CASSLNPTGTESPYNEQFF	TGTGCCAGCAGCTTAAACCCGACCGGGACAGAATCCCCCTACAATGAGCAGTTCTTC	1	0.0760456
TRBV28	TRBJ2-1	TRBC2	CASSLQGGTSNEQFF	TGTGCCAGCAGTTTACAGGGAGGGACTTCCAATGAGCAGTTCTTC	1	0.0760456
TRBV27	TRBJ2-1	TRBC2	CASSLQQGGAYNEQFF	TGTGCCAGCAGTTTACAACAGGGGGGAGCCTACAATGAGCAGTTCTTC	1	0.0760456
TRBV11-2	TRBJ2-1	TRBC2	CASSLRAGVHFF	TGTGCCAGCAGCTTACGAGCGGGAGTTCATTTCTTC	1	0.0760456
TRBV27	TRBJ2-7	TRBC2	CASSLRGRADEQYF	TGTGCCAGCAGTTTACGGGGCAGGGCCGACGAGCAGTACTTC	1	0.0760456
TRBV28	TRBJ1-6	TRBC1	CASSLRRTANSPLHF	TGTGCCAGCAGTTTACGACGGACAGCGAATTCACCCCTCCACTTT	1	0.0760456
TRBV7-9	TRBJ1-2	TRBC1	CASSLRTGGLPNYGYTF	TGTGCCAGCAGCTTACGGACAGGGGGGCTTCCTAACTATGGCTACACCTTC	1	0.0760456
TRBV27	TRBJ2-7	TRBC2	CASSLSGGIYEQYF	TGTGCCAGCAGTTTATCGGGCGGCATCTACGAGCAGTACTTC	1	0.0760456
TRBV18	TRBJ2-1	TRBC2	CASSLSGPRFYNEQFF	TGTGCCAGCTCACTAAGTGGCCCCCGCTTCTACAATGAGCAGTTCTTC	1	0.0760456
TRBV13	TRBJ2-1	TRBC2	CASSLSGQGFNEQFF	TGTGCCAGCAGCTTATCGGGACAGGGTTTCAATGAGCAGTTCTTC	1	0.0760456
TRBV11-2	TRBJ2-2	TRBC2	CASSLSHQNTGELFF	TGTGCCAGCAGCTTATCGCACCAGAACACCGGGGAGCTGTTTTTT	1	0.0760456
TRBV19	TRBJ1-1	TRBC1	CASSLSLGIHTMDTEAFF	TGTGCCAGTAGTCTTAGCCTAGGGATCCATACTATGGACACTGAAGCTTTCTTT	1	0.0760456
TRBV7-6	TRBJ2-5	TRBC2	CASSLSPVSGRARETQYF	TGTGCCAGCAGCTTATCGCCTGTTAGCGGGAGGGCCCGAGAGACCCAGTACTTC	1	0.0760456
TRBV28	TRBJ2-2	TRBC2	CASSLSSARGELFF	TGTGCCAGCAGTTTGTCTAGCGCTCGAGGGGAGCTGTTTTTT	1	0.0760456
TRBV7-9	TRBJ2-2	TRBC2	CASSLSSDSLYTGELFF	TGTGCCAGCAGCTTGTCTTCCGACTCCCTATACACCGGGGAGCTGTTTTTT	1	0.0760456
TRBV28	TRBJ2-2	TRBC2	CASSLSTTPGELFF	TGTGCCAGCAGTTTATCTACCACGCCCGGGGAGCTGTTTTTT	1	0.0760456
TRBV7-9	TRBJ2-6	TRBC2	CASSLSVSGANVLTF	TGTGCCAGCAGCTTGAGCGTCTCTGGGGCCAACGTCCTGACTTTC	1	0.0760456
TRBV27	TRBJ1-6	TRBC1	CASSLSVSSYNSPLHF	TGTGCCAGCAGTTTATCAGTGAGCTCCTATAATTCACCCCTCCACTTT	1	0.0760456
TRBV3-1	TRBJ2-3	TRBC2	CASSLTGGRTDTQYF	TGTGCCAGCAGCCTAACAGGGGGGAGGACAGATACGCAGTATTTT	1	0.0760456
TRBV27	TRBJ2-3	TRBC2	CASSLTPQQGNTQYF	TGTGCCAGCAGTCTAACCCCCCAACAGGGAAATACGCAGTATTTT	1	0.0760456
TRBV7-9	TRBJ1-2	TRBC1	CASSLVAGGFGYTF	TGTGCCAGCAGCTTAGTGGCAGGTGGATTTGGCTACACCTTC	1	0.0760456
TRBV7-9	TRBJ2-2	TRBC2	CASSLVENTGELFF	TGTGCCAGCAGCTTAGTGGAAAACACCGGGGAGCTGTTTTTT	1	0.0760456
TRBV7-9	TRBJ2-3	TRBC2	CASSLVGGFTDTQYF	TGTGCCAGCAGCTTAGTCGGTGGCTTCACAGATACGCAGTATTTT	1	0.0760456
TRBV13	TRBJ2-2	TRBC2	CASSLVGGGNTGELFF	TGTGCCAGCAGCCTAGTCGGCGGGGGCAACACCGGGGAGCTGTTTTTT	1	0.0760456
TRBV11-2	TRBJ2-4	TRBC2	CASSLVGSANIQYF	TGTGCCAGCAGCTTAGTCGGCAGCGCGAACATTCAGTACTTC	1	0.0760456
TRBV7-2	TRBJ2-4	TRBC2	CASSLVGTSGAKNIQYF	TGTGCCAGCAGCTTAGTCGGAACTAGCGGAGCCAAAAACATTCAGTACTTC	1	0.0760456
TRBV5-4	TRBJ2-2	TRBC2	CASSLVLGQGTGELFF	TGTGCCAGCAGCTTGGTCCTGGGACAGGGAACCGGGGAGCTGTTTTTT	1	0.0760456
TRBV5-1	TRBJ2-5	TRBC2	CASSLVRETQYF	TGCGCCAGCAGCTTGGTCCGAGAGACCCAGTACTTC	1	0.0760456
TRBV28	TRBJ2-1	TRBC2	CASSLWAGAVNEQFF	TGTGCCAGCAGTTTATGGGCGGGAGCGGTCAATGAGCAGTTCTTC	1	0.0760456
TRBV27	TRBJ1-2	TRBC1	CASSLWGGQGYGYTF	TGTGCCAGCAGTTTGTGGGGGGGCCAAGGTTATGGCTACACCTTC	1	0.0760456
TRBV7-6	TRBJ2-2	TRBC2	CASSLWQGTFTGELFF	TGTGCCAGCAGCTTATGGCAGGGGACTTTCACCGGGGAGCTGTTTTTT	1	0.0760456
TRBV28	TRBJ2-7	TRBC2	CASSLWRDSTGDYEQYF	TGTGCCAGCAGTTTATGGCGGGACAGCACCGGCGACTACGAGCAGTACTTC	1	0.0760456
TRBV5-6	TRBJ2-3	TRBC2	CASSLWTKDTQYF	TGTGCCAGCAGCTTGTGGACCAAAGATACGCAGTATTTT	1	0.0760456
TRBV11-2	TRBJ1-2	TRBC1	CASSLYRDLENYGYTF	TGTGCCAGCAGCCTCTACCGGGACTTGGAAAACTATGGCTACACCTTC	1	0.0760456
TRBV19	TRBJ2-7	TRBC2	CASSMGLYSYEQYF	TGTGCCAGTAGTATGGGACTTTACTCCTACGAGCAGTACTTC	1	0.0760456
TRBV28	TRBJ1-6	TRBC1	CASSNPRGPLHF	TGTGCCAGCAGTAATCCGAGGGGACCCCTCCACTTT	1	0.0760456
TRBV4-3	TRBJ1-1	TRBC1	CASSPAATDNTEAFF	TGCGCCAGCAGCCCAGCCGCTACTGATAACACTGAAGCTTTCTTT	1	0.0760456
TRBV28	TRBJ2-3	TRBC2	CASSPAGVTDTQYF	TGTGCCAGCAGTCCCGCCGGTGTCACAGATACGCAGTATTTT	1	0.0760456
TRBV19	TRBJ2-1	TRBC2	CASSPAQALSKEQFF	TGTGCCAGTAGCCCTGCGCAGGCCCTATCCAAGGAGCAGTTCTTC	1	0.0760456
TRBV18	TRBJ2-3	TRBC2	CASSPAQTDTQYF	TGTGCCAGCTCACCAGCTCAAACAGATACGCAGTATTTT	1	0.0760456
TRBV18	TRBJ2-3	TRBC2	CASSPDILTGTYTDTQYF	TGTGCCAGCTCACCAGATATCTTAACCGGGACATATACAGATACGCAGTATTTT	1	0.0760456
TRBV7-2	TRBJ1-5	TRBC1	CASSPDNANGPQHF	TGTGCCAGCAGCCCAGACAACGCCAATGGACCCCAGCATTTT	1	0.0760456
TRBV18	TRBJ1-2	TRBC1	CASSPDRGNYGYTF	TGTGCCAGCTCACCAGACAGGGGAAACTATGGCTACACCTTC	1	0.0760456
TRBV5-1	TRBJ2-7	TRBC2	CASSPDRGTHEQYF	TGCGCCAGCAGCCCGGACAGGGGTACTCACGAGCAGTACTTC	1	0.0760456
TRBV7-3	TRBJ2-3	TRBC2	CASSPFPGWTDTQYF	TGTGCCAGCAGCCCCTTCCCAGGGTGGACAGATACGCAGTATTTT	1	0.0760456
TRBV18	TRBJ1-5	TRBC1	CASSPGQGTQPQHF	TGTGCCAGCTCACCGGGGCAGGGCACTCAGCCCCAGCATTTT	1	0.0760456
TRBV28	TRBJ2-1	TRBC2	CASSPGSHYNEQFF	TGTGCCAGCAGTCCCGGGTCCCACTACAATGAGCAGTTCTTC	1	0.0760456
TRBV3-1	TRBJ1-6	TRBC1	CASSPGTGGGSPLHF	TGTGCCAGCAGCCCTGGAACGGGAGGTGGTTCACCCCTCCACTTT	1	0.0760456
TRBV3-1	TRBJ1-1	TRBC1	CASSPGTGGGTEAFF	TGTGCCAGCAGCCCCGGGACAGGTGGGGGCACTGAAGCTTTCTTT	1	0.0760456
TRBV2	TRBJ2-1	TRBC2	CASSPGTSTYNEQFF	TGTGCCAGCAGTCCCGGGACTAGCACTTACAATGAGCAGTTCTTC	1	0.0760456
TRBV18	TRBJ1-2	TRBC1	CASSPGTVNYGYTF	TGTGCCAGCTCACCCGGGACGGTTAACTATGGCTACACCTTC	1	0.0760456
TRBV7-9	TRBJ2-7	TRBC2	CASSPGVEQYF	TGTGCCAGCAGCCCGGGGGTAGAGCAGTACTTC	1	0.0760456
TRBV12-3	TRBJ1-1	TRBC1	CASSPHLLGVNTEAFF	TGTGCCAGCAGTCCGCACCTTTTGGGTGTGAACACTGAAGCTTTCTTT	1	0.0760456
TRBV7-9	TRBJ2-1	TRBC2	CASSPHQTTSASSYNEQFF	TGTGCCAGCAGCCCTCACCAAACAACTAGCGCTAGCTCCTACAATGAGCAGTTCTTC	1	0.0760456
TRBV7-9	TRBJ2-7	TRBC2	CASSPIRSGLAAEQYF	TGTGCCAGCAGCCCAATCAGGTCGGGACTAGCGGCCGAGCAGTACTTC	1	0.0760456
TRBV7-7	TRBJ2-1	TRBC2	CASSPLGREGYNEQFF	TGTGCCAGCAGCCCTCTCGGGCGGGAGGGGTACAATGAGCAGTTCTTC	1	0.0760456
TRBV18	TRBJ2-6	TRBC2	CASSPLPKGPDSLSGANVLTF	TGTGCCAGCTCACCACTCCCCAAAGGTCCAGATAGCCTCTCTGGGGCCAACGTCCTGACTTTC	1	0.0760456
TRBV18	TRBJ2-6	TRBC2	CASSPLRLAGGALGANVLTF	TGTGCCAGCTCACCCCTACGACTAGCGGGAGGTGCCCTGGGGGCCAACGTCCTGACTTTC	1	0.0760456
TRBV5-1	TRBJ1-1	TRBC1	CASSPLVSVQNTEAFF	TGCGCCAGCAGCCCCCTGGTATCGGTCCAGAACACTGAAGCTTTCTTT	1	0.0760456
TRBV18	TRBJ2-3	TRBC2	CASSPMVFTDTQYF	TGTGCCAGCTCACCAATGGTGTTCACAGATACGCAGTATTTT	1	0.0760456
TRBV7-9	TRBJ1-5	TRBC1	CASSPNNQPQHF	TGTGCCAGCAGCCCCAACAATCAGCCCCAGCATTTT	1	0.0760456
TRBV16	TRBJ1-6	TRBC1	CASSPPEDSYNSPLHF	TGTGCCAGCAGCCCCCCTGAGGACTCCTATAATTCACCCCTCCACTTT	1	0.0760456
TRBV7-9	TRBJ1-5	TRBC1	CASSPPGGPNSNQPQHF	TGTGCCAGCAGCCCGCCGGGTGGTCCCAATAGCAATCAGCCCCAGCATTTT	1	0.0760456
TRBV28	TRBJ2-5	TRBC2	CASSPPGRQETQYF	TGTGCCAGCAGTCCCCCGGGGAGGCAAGAGACCCAGTACTTC	1	0.0760456
TRBV4-1	TRBJ1-1	TRBC1	CASSPPGTLNTEAFF	TGCGCCAGCAGCCCGCCGGGCACCCTGAACACTGAAGCTTTCTTT	1	0.0760456
TRBV18	TRBJ2-5	TRBC2	CASSPPHGQETQYF	TGTGCCAGCTCACCACCACACGGACAAGAGACCCAGTACTTC	1	0.0760456
TRBV5-1	TRBJ2-1	TRBC2	CASSPPPSYNEQFF	TGCGCCAGCAGCCCTCCACCCTCCTACAATGAGCAGTTCTTC	1	0.0760456
TRBV18	TRBJ2-7	TRBC2	CASSPQSGVEQYF	TGTGCCAGCTCACCACAATCAGGGGTCGAGCAGTACTTC	1	0.0760456
TRBV5-1	TRBJ2-6	TRBC2	CASSPQSSGANVLTF	TGCGCCAGCAGCCCTCAATCCTCTGGGGCCAACGTCCTGACTTTC	1	0.0760456
TRBV18	TRBJ1-1	TRBC1	CASSPQTNFGDRAFF	TGTGCCAGCTCACCGCAAACTAACTTCGGGGACCGAGCTTTCTTT	1	0.0760456
TRBV19	TRBJ2-6	TRBC2	CASSPQVGANVLTF	TGTGCCAGTAGCCCCCAGGTTGGGGCCAACGTCCTGACTTTC	1	0.0760456
TRBV11-2	TRBJ1-1	TRBC1	CASSPQVSNTEAFF	TGTGCCAGCAGCCCACAGGTTTCGAACACTGAAGCTTTCTTT	1	0.0760456
TRBV14	TRBJ1-3	TRBC1	CASSPRGISGNTIYF	TGTGCCAGCAGCCCCCGGGGGATCTCTGGAAACACCATATATTTT	1	0.0760456
TRBV5-1	TRBJ2-2	TRBC2	CASSPRGMNTGELFF	TGCGCCAGCAGCCCGCGGGGGATGAACACCGGGGAGCTGTTTTTT	1	0.0760456
TRBV6-2	TRBJ2-1	TRBC2	CASSPRSSGRVNEQFF	TGTGCCAGCAGTCCCCGGTCTAGCGGGAGGGTCAATGAGCAGTTCTTC	1	0.0760456
TRBV9	TRBJ2-2	TRBC2	CASSPRTGELFF	TGTGCCAGCAGCCCAAGGACCGGGGAGCTGTTTTTT	1	0.0760456
TRBV7-9	TRBJ2-1	TRBC2	CASSPRTGGLYNEQFF	TGTGCCAGCAGCCCACGGACAGGCGGGTTGTACAATGAGCAGTTCTTC	1	0.0760456
TRBV5-6	TRBJ2-7	TRBC2	CASSPRTSDYEQYF	TGTGCCAGCAGCCCGCGGACTAGCGACTACGAGCAGTACTTC	1	0.0760456
TRBV27	TRBJ2-1	TRBC2	CASSPSGTGGFYNEQFF	TGTGCCAGCAGTCCCTCCGGGACAGGGGGATTCTACAATGAGCAGTTCTTC	1	0.0760456
TRBV18	TRBJ1-2	TRBC1	CASSPSLGADGYTF	TGTGCCAGCTCACCCTCTTTGGGGGCGGATGGCTACACCTTC	1	0.0760456
TRBV5-1	TRBJ2-1	TRBC2	CASSPSNPYNEQFF	TGCGCCAGCAGCCCCTCTAACCCTTACAATGAGCAGTTCTTC	1	0.0760456
TRBV18	TRBJ2-1	TRBC2	CASSPSVPSGGTRNEQFF	TGTGCCAGCTCACCATCTGTGCCTAGCGGGGGTACACGGAATGAGCAGTTCTTC	1	0.0760456
TRBV12-3	TRBJ1-5	TRBC1	CASSPTGGNQPQHF	TGTGCCAGCAGCCCGACAGGGGGAAATCAGCCCCAGCATTTT	1	0.0760456
TRBV28	TRBJ2-2	TRBC2	CASSPTGMNTGELFF	TGTGCCAGCAGTCCGACAGGGATGAACACCGGGGAGCTGTTTTTT	1	0.0760456
TRBV9	TRBJ2-3	TRBC2	CASSPTMGGWFIDTQYF	TGTGCCAGCAGCCCAACAATGGGGGGATGGTTTATAGATACGCAGTATTTT	1	0.0760456
TRBV7-6	TRBJ2-4	TRBC2	CASSPTPVWSAYLYYLGTNLFRVENIQYF	TGTGCCAGCAGCCCGACACCCGTGTGGTCGGCGTATCTCTATTATCTCGGGACAAATTTATTTCGCGTCGAAAACATTCAGTACTTC	1	0.0760456
TRBV28	TRBJ2-7	TRBC2	CASSPTPYEQYF	TGTGCCAGCAGCCCTACCCCCTACGAGCAGTACTTC	1	0.0760456
TRBV18	TRBJ2-7	TRBC2	CASSPVQGLGHEQYF	TGTGCCAGCTCACCAGTCCAGGGGTTGGGCCACGAGCAGTACTTC	1	0.0760456
TRBV3-1	TRBJ2-6	TRBC2	CASSQAGPGANVLTF	TGTGCCAGCAGCCAAGCTGGGCCTGGGGCCAACGTCCTGACTTTC	1	0.0760456
TRBV3-1	TRBJ1-2	TRBC1	CASSQDTGAGYTF	TGTGCCAGCAGCCAAGATACGGGTGCTGGCTACACCTTC	1	0.0760456
TRBV3-1	TRBJ1-1	TRBC1	CASSQDVNTEAFF	TGTGCCAGCAGCCAAGATGTGAACACTGAAGCTTTCTTT	1	0.0760456
TRBV3-1	TRBJ1-1	TRBC1	CASSQEGAEAFF	TGTGCCAGCAGCCAAGAAGGGGCTGAAGCTTTCTTT	1	0.0760456
TRBV3-1	TRBJ2-2	TRBC2	CASSQGDGTSGNTGELFF	TGTGCCAGCAGCCAAGGGGACGGGACTAGCGGGAACACCGGGGAGCTGTTTTTT	1	0.0760456
TRBV9	TRBJ1-6	TRBC1	CASSQGDYNSPLHF	TGTGCCAGCAGCCAGGGAGATTATAATTCACCCCTCCACTTT	1	0.0760456
TRBV3-1	TRBJ1-2	TRBC1	CASSQGLGTDYGYTF	TGTGCCAGCAGCCAAGGCTTGGGGACGGACTATGGCTACACCTTC	1	0.0760456
TRBV3-1	TRBJ2-7	TRBC2	CASSQGSVTGHYEQYF	TGTGCCAGCAGCCAAGGGTCGGTGACAGGCCACTACGAGCAGTACTTC	1	0.0760456
TRBV11-3	TRBJ1-4	TRBC1	CASSQKDQGGEKLFF	TGTGCCAGCAGCCAAAAAGACCAGGGAGGTGAAAAACTGTTTTTT	1	0.0760456
TRBV6-2	TRBJ2-1	TRBC2	CASSQLAYYNEQFF	TGTGCCAGCAGCCAACTAGCGTATTACAATGAGCAGTTCTTC	1	0.0760456
TRBV7-9	TRBJ2-5	TRBC2	CASSQNRDGQETQYF	TGTGCCAGCAGCCAAAACCGGGACGGCCAAGAGACCCAGTACTTC	1	0.0760456
TRBV14	TRBJ1-1	TRBC1	CASSQSPTGFTEAFF	TGTGCCAGCAGCCAATCACCGACAGGGTTTACTGAAGCTTTCTTT	1	0.0760456
TRBV7-9	TRBJ2-7	TRBC2	CASSQVGQGFYEQYF	TGTGCCAGCAGCCAAGTCGGACAGGGATTTTACGAGCAGTACTTC	1	0.0760456
TRBV14	TRBJ2-3	TRBC2	CASSQVGTTDTQYF	TGTGCCAGCAGCCAAGTCGGGACCACAGATACGCAGTATTTT	1	0.0760456
TRBV3-1	TRBJ2-5	TRBC2	CASSQWTSGVEETQYF	TGTGCCAGCAGCCAATGGACTAGCGGGGTCGAAGAGACCCAGTACTTC	1	0.0760456
TRBV4-3	TRBJ2-1	TRBC2	CASSRAPSGSMNEQFF	TGCGCCAGCAGCCGGGCCCCCAGCGGGAGTATGAATGAGCAGTTCTTC	1	0.0760456
TRBV7-2	TRBJ1-1	TRBC1	CASSRDGNTEAFF	TGTGCCAGCAGCCGAGACGGGAACACTGAAGCTTTCTTT	1	0.0760456
TRBV3-1	TRBJ1-4	TRBC1	CASSRDSNEKLFF	TGTGCCAGCAGCCGAGACAGTAATGAAAAACTGTTTTTT	1	0.0760456
TRBV4-1	TRBJ1-5	TRBC1	CASSRDSNQPQHF	TGCGCCAGCAGCCGGGATAGCAATCAGCCCCAGCATTTT	1	0.0760456
TRBV7-3	TRBJ2-5	TRBC2	CASSREGEETQYF	TGTGCCAGCAGCCGCGAGGGGGAAGAGACCCAGTACTTC	1	0.0760456
TRBV18	TRBJ2-7	TRBC2	CASSRFAHLYEQYF	TGTGCCAGCTCCCGCTTTGCTCATCTCTACGAGCAGTACTTC	1	0.0760456
TRBV18	TRBJ1-1	TRBC1	CASSRGRTVNTEAFF	TGTGCCAGCTCCCGAGGTAGGACAGTAAACACTGAAGCTTTCTTT	1	0.0760456
TRBV7-2	TRBJ1-2	TRBC1	CASSRGSGTGLGYTF	TGTGCCAGCAGCCGGGGAAGCGGGACAGGGTTGGGCTACACCTTC	1	0.0760456
TRBV14	TRBJ1-1	TRBC1	CASSRIRDRATEAFF	TGTGCCAGCAGCCGGATCCGGGACAGGGCCACTGAAGCTTTCTTT	1	0.0760456
TRBV3-1	TRBJ2-2	TRBC2	CASSRPGQGVAGELFF	TGTGCCAGCAGCCGACCGGGACAGGGAGTTGCCGGGGAGCTGTTTTTT	1	0.0760456
TRBV6-2	TRBJ1-5	TRBC1	CASSRPSTSRGRSNNQPQHF	TGTGCCAGCAGTCGGCCCTCCACGTCCAGGGGCCGCTCTAACAATCAGCCCCAGCATTTT	1	0.0760456
TRBV28	TRBJ2-7	TRBC2	CASSRRGIESYEQYF	TGTGCCAGCAGCCGGCGGGGGATCGAGTCCTACGAGCAGTACTTC	1	0.0760456
TRBV7-9	TRBJ1-1	TRBC1	CASSRSLEAFF	TGTGCCAGCAGCCGGAGCCTTGAAGCTTTCTTT	1	0.0760456
TRBV7-6	TRBJ2-5	TRBC2	CASSRTDNQETQYF	TGTGCCAGCAGTCGGACAGACAACCAAGAGACCCAGTACTTC	1	0.0760456
TRBV5-1	TRBJ1-2	TRBC1	CASSRTPEETYYGYTF	TGCGCCAGCAGCCGTACCCCCGAGGAAACCTACTATGGCTACACCTTC	1	0.0760456
TRBV7-2	TRBJ2-5	TRBC2	CASSSDSDSETQYF	TGTGCCAGCAGCTCGGACAGCGATTCAGAGACCCAGTACTTC	1	0.0760456
TRBV28	TRBJ2-7	TRBC2	CASSSETGLDYEQYF	TGTGCCAGCAGTTCTGAAACGGGACTAGACTACGAGCAGTACTTC	1	0.0760456
TRBV5-4	TRBJ2-7	TRBC2	CASSSGPPSGTGGYEQYF	TGTGCCAGCAGCTCCGGCCCCCCATCCGGGACAGGGGGCTACGAGCAGTACTTC	1	0.0760456
TRBV28	TRBJ1-5	TRBC1	CASSSGQGPPQHF	TGTGCCAGCAGTTCAGGACAGGGTCCGCCCCAGCATTTT	1	0.0760456
TRBV27	TRBJ2-1	TRBC2	CASSSGTNTGGQFF	TGTGCCAGCAGTTCCGGAACTAACACGGGCGGGCAGTTCTTC	1	0.0760456
TRBV7-2	TRBJ2-2	TRBC2	CASSSHTRRQGKAGELFF	TGTGCCAGCAGCTCACATACACGTAGACAGGGTAAAGCCGGGGAGCTGTTTTTT	1	0.0760456
TRBV11-2	TRBJ2-2	TRBC2	CASSSLPGGNTGELFF	TGTGCCAGCAGCTCACTACCTGGAGGGAACACCGGGGAGCTGTTTTTT	1	0.0760456
TRBV11-2	TRBJ1-1	TRBC1	CASSSPPTRHANTEAFF	TGTGCCAGCAGCTCTCCACCGACCCGGCATGCGAACACTGAAGCTTTCTTT	1	0.0760456
TRBV27	TRBJ2-5	TRBC2	CASSSPSQETQYF	TGTGCCAGCAGTTCCCCATCCCAAGAGACCCAGTACTTC	1	0.0760456
TRBV19	TRBJ2-7	TRBC2	CASSSRLAGEEQYF	TGTGCCAGTAGTTCACGACTAGCGGGAGAGGAGCAGTACTTC	1	0.0760456
TRBV5-1	TRBJ1-4	TRBC1	CASSSSDGGEKLFF	TGCGCCAGCAGCTCCTCAGACGGGGGTGAAAAACTGTTTTTT	1	0.0760456
TRBV11-2	TRBJ1-6	TRBC1	CASSSSSSYNSPLHF	TGTGCCAGCAGCTCCAGTAGCTCCTATAATTCACCCCTCCACTTT	1	0.0760456
TRBV7-9	TRBJ2-7	TRBC2	CASSSVTQYEQYF	TGTGCCAGCAGCTCTGTAACACAGTACGAGCAGTACTTC	1	0.0760456
TRBV28	TRBJ2-7	TRBC2	CASSSYVSGTGNYEQYF	TGTGCCAGCAGTTCCTACGTATCCGGGACAGGGAACTACGAGCAGTACTTC	1	0.0760456
TRBV13	TRBJ2-2	TRBC2	CASSSYWVPYLTGELFF	TGTGCCAGCAGCTCATATTGGGTGCCCTATCTCACCGGGGAGCTGTTTTTT	1	0.0760456
TRBV28	TRBJ2-7	TRBC2	CASSSYYEQYF	TGTGCCAGCAGTTCATACTACGAGCAGTACTTC	1	0.0760456
TRBV6-2	TRBJ2-7	TRBC2	CASSTDSPGLAGEWYEQYF	TGTGCCAGCAGTACCGACAGCCCGGGACTAGCGGGAGAGTGGTACGAGCAGTACTTC	1	0.0760456
TRBV19	TRBJ1-1	TRBC1	CASSTLDRGLNTEAFF	TGTGCCAGTAGTACGCTGGACAGGGGGTTGAACACTGAAGCTTTCTTT	1	0.0760456
TRBV5-6	TRBJ1-1	TRBC1	CASSTNLNTEAFF	TGTGCCAGCAGCACAAACCTGAACACTGAAGCTTTCTTT	1	0.0760456
TRBV7-2	TRBJ2-3	TRBC2	CASSTQGMGTDTQYF	TGTGCCAGCAGCACACAGGGGATGGGCACAGATACGCAGTATTTT	1	0.0760456
TRBV6-5	TRBJ1-2	TRBC1	CASSTRGRVEGAYGYTF	TGTGCCAGCAGTACCAGGGGACGAGTGGAAGGAGCGTATGGCTACACCTTC	1	0.0760456
TRBV7-2	TRBJ2-2	TRBC2	CASSTRTSTGELFF	TGTGCCAGCAGCACTAGAACGAGCACCGGGGAGCTGTTTTTT	1	0.0760456
TRBV25-1	TRBJ1-4	TRBC1	CASSTRVGDRRLFF	TGTGCCAGCAGTACACGGGTTGGGGACAGAAGACTGTTTTTT	1	0.0760456
TRBV14	TRBJ2-1	TRBC2	CASSTSKGLVNEQFF	TGTGCCAGCAGCACGAGCAAGGGGCTTGTCAATGAGCAGTTCTTC	1	0.0760456
TRBV9	TRBJ2-3	TRBC2	CASSVAEQGLQYF	TGTGCCAGCAGCGTAGCTGAACAGGGTCTGCAGTATTTT	1	0.0760456
TRBV9	TRBJ2-7	TRBC2	CASSVAPSEGVLLYEQYF	TGTGCCAGCAGCGTAGCGCCTTCGGAGGGGGTCCTTCTTTACGAGCAGTACTTC	1	0.0760456
TRBV9	TRBJ2-1	TRBC2	CASSVAPTSGYNEQFF	TGTGCCAGCAGCGTAGCCCCGACTAGCGGCTACAATGAGCAGTTCTTC	1	0.0760456
TRBV19	TRBJ1-5	TRBC1	CASSVAYGQPQHF	TGTGCCAGTAGTGTTGCGTATGGTCAGCCCCAGCATTTT	1	0.0760456
TRBV9	TRBJ2-5	TRBC2	CASSVDAGARARETQYF	TGTGCCAGCAGCGTAGACGCGGGAGCCCGGGCGCGTGAGACCCAGTACTTC	1	0.0760456
TRBV9	TRBJ2-7	TRBC2	CASSVDGAGGSYEQYF	TGTGCCAGCAGCGTAGATGGAGCGGGAGGATCCTACGAGCAGTACTTC	1	0.0760456
TRBV9	TRBJ2-7	TRBC2	CASSVEGRSSDEQYF	TGTGCCAGCAGCGTAGAGGGGAGATCTTCCGACGAGCAGTACTTC	1	0.0760456
TRBV9	TRBJ2-7	TRBC2	CASSVGEGLRSYEQYF	TGTGCCAGCAGCGTAGGTGAAGGGTTGCGGTCCTACGAGCAGTACTTC	1	0.0760456
TRBV2	TRBJ2-5	TRBC2	CASSVGGAGQETQYF	TGTGCCAGCAGTGTTGGGGGCGCGGGGCAAGAGACCCAGTACTTC	1	0.0760456
TRBV9	TRBJ2-3	TRBC2	CASSVGGVGTDTQYF	TGTGCCAGCAGCGTAGGAGGTGTAGGCACAGATACGCAGTATTTT	1	0.0760456
TRBV11-3	TRBJ2-5	TRBC2	CASSVGPLGTQYF	TGTGCCAGCAGCGTGGGACCACTGGGGACCCAGTACTTC	1	0.0760456
TRBV9	TRBJ1-1	TRBC1	CASSVGSGADTEAFF	TGTGCCAGCAGCGTCGGATCCGGCGCGGACACTGAAGCTTTCTTT	1	0.0760456
TRBV9	TRBJ1-2	TRBC1	CASSVGTTYGYTF	TGTGCCAGCAGCGTGGGGACAACCTATGGCTACACCTTC	1	0.0760456
TRBV9	TRBJ2-3	TRBC2	CASSVLGLAGGGTDTQYF	TGTGCCAGCAGCGTCTTGGGACTAGCGGGGGGCGGCACAGATACGCAGTATTTT	1	0.0760456
TRBV9	TRBJ2-3	TRBC2	CASSVSGSNTDTQYF	TGTGCCAGCAGCGTGAGCGGGAGTAACACAGATACGCAGTATTTT	1	0.0760456
TRBV10-2	TRBJ2-3	TRBC2	CASSVTAGGPSDTQYF	TGCGCCAGCAGTGTAACAGCGGGAGGGCCTTCAGATACGCAGTATTTT	1	0.0760456
TRBV9	TRBJ2-7	TRBC2	CASSVVAGAAYEQYF	TGTGCCAGCAGCGTAGTAGCGGGAGCTGCCTACGAGCAGTACTTC	1	0.0760456
TRBV19	TRBJ2-3	TRBC2	CASSVVGVAISDTQYF	TGTGCCAGTAGCGTCGTCGGGGTAGCAATCTCAGATACGCAGTATTTT	1	0.0760456
TRBV9	TRBJ1-6	TRBC1	CASSVVGVGSPLHF	TGTGCCAGCAGCGTAGTGGGGGTCGGTTCACCCCTCCACTTT	1	0.0760456
TRBV7-2	TRBJ1-1	TRBC1	CASSWAAGTEAFF	TGTGCCAGCAGCTGGGCCGCGGGCACTGAAGCTTTCTTT	1	0.0760456
TRBV27	TRBJ1-1	TRBC1	CASSWGLNTEAFF	TGTGCCAGCTCCTGGGGACTGAACACTGAAGCTTTCTTT	1	0.0760456
TRBV5-1	TRBJ1-2	TRBC1	CASSWGTGGNGYTF	TGCGCCAGCAGCTGGGGGACAGGGGGGAATGGCTACACCTTC	1	0.0760456
TRBV19	TRBJ2-7	TRBC2	CASSWRDEQYF	TGTGCCAGTAGTTGGAGGGACGAGCAGTACTTC	1	0.0760456
TRBV7-3	TRBJ2-5	TRBC2	CASSWRLAGEILSETQYF	TGTGCCAGCAGCTGGAGACTAGCGGGAGAAATATTATCGGAGACCCAGTACTTC	1	0.0760456
TRBV27	TRBJ2-7	TRBC2	CASSYDIRSSYEQYF	TGTGCCAGCAGTTACGACATAAGAAGCTCCTACGAGCAGTACTTC	1	0.0760456
TRBV7-2	TRBJ1-4		CASSYGPYGREKLFF	TGTGCCAGCAGTTACGGGCCGTATGGGCGTGAAAAACTGTTTTTT	1	0.0760456
TRBV28	TRBJ2-1	TRBC2	CASSYGRGDNEQFF	TGTGCCAGCAGTTACGGGAGGGGAGACAATGAGCAGTTCTTC	1	0.0760456
TRBV27	TRBJ1-5	TRBC1	CASSYRDSNQPQHF	TGTGCCAGCAGTTACCGGGACAGCAATCAGCCCCAGCATTTT	1	0.0760456
TRBV6-5	TRBJ1-4	TRBC1	CASSYSGEGIATNEKLFF	TGTGCCAGCAGTTACTCTGGTGAGGGGATTGCAACTAATGAAAAACTGTTTTTT	1	0.0760456
TRBV11-3	TRBJ1-1	TRBC1	CASSYSGTNMNTEAFF	TGTGCCAGCAGCTACTCCGGGACAAACATGAACACTGAAGCTTTCTTT	1	0.0760456
TRBV6-5	TRBJ2-7	TRBC2	CASSYSSRTYEQYF	TGTGCCAGCAGTTACTCTAGCAGAACCTACGAGCAGTACTTC	1	0.0760456
TRBV28	TRBJ2-7	TRBC2	CASTDKQGLYSYEQYF	TGTGCCAGCACCGATAAACAGGGTTTATATAGCTACGAGCAGTACTTC	1	0.0760456
TRBV5-1	TRBJ2-2	TRBC2	CASTFNTGELFF	TGCGCCAGCACATTTAACACCGGGGAGCTGTTTTTT	1	0.0760456
TRBV2	TRBJ2-7	TRBC2	CASTGEYEQYF	TGTGCCAGCACAGGGGAGTACGAGCAGTACTTC	1	0.0760456
TRBV2	TRBJ1-2	TRBC1	CASTGTGGIYGYTF	TGTGCCAGCACTGGGACAGGGGGTATCTATGGCTACACCTTC	1	0.0760456
TRBV28	TRBJ2-1	TRBC2	CASTLLGTAGDEQFF	TGTGCCAGCACCCTTCTCGGGACAGCTGGCGATGAGCAGTTCTTC	1	0.0760456
TRBV6-1	TRBJ2-1	TRBC2	CASTPGLAGGYVSYNEQFF	TGTGCCAGCACCCCGGGGCTAGCGGGGGGTTACGTCTCCTACAATGAGCAGTTCTTC	1	0.0760456
TRBV6-1	TRBJ2-5	TRBC2	CASTQGAQYF	TGTGCCAGCACCCAGGGGGCCCAGTACTTC	1	0.0760456
TRBV19	TRBJ1-2	TRBC1	CASTRQGTLNGYTF	TGTGCCAGTACCCGACAGGGGACCTTAAACGGCTACACCTTC	1	0.0760456
TRBV27	TRBJ2-2	TRBC2	CATRKLGSSIWAKANTGELFF	TGTGCCACCAGGAAACTAGGTTCATCGATTTGGGCCAAGGCGAACACCGGGGAGCTGTTTTTT	1	0.0760456
TRBV24-1	TRBJ2-2	TRBC2	CATSAEGDTGELFF	TGTGCCACCAGTGCGGAGGGAGACACCGGGGAGCTGTTTTTT	1	0.0760456
TRBV24-1	TRBJ2-5	TRBC2	CATSAPKPGQVDSIQETQYF	TGTGCCACCAGTGCTCCAAAGCCGGGACAGGTGGACTCGATTCAAGAGACCCAGTACTTC	1	0.0760456
TRBV24-1	TRBJ2-1	TRBC2	CATSASSGRVYNEQFF	TGTGCCACCAGTGCGTCTAGCGGGAGAGTCTACAATGAGCAGTTCTTC	1	0.0760456
TRBV24-1	TRBJ2-1	TRBC2	CATSDLKGEQFF	TGTGCCACCAGTGATTTAAAGGGTGAGCAGTTCTTC	1	0.0760456
TRBV24-1	TRBJ2-1	TRBC2	CATSGGTSGRSEQFF	TGTGCCACCAGTGGTGGGACTAGCGGGAGGAGTGAGCAGTTCTTC	1	0.0760456
TRBV24-1	TRBJ1-2	TRBC1	CATSPNTGSGYTF	TGTGCCACCAGTCCTAATACAGGGTCCGGCTACACCTTC	1	0.0760456
TRBV24-1	TRBJ2-2	TRBC2	CATSRTGQNTGELFF	TGTGCCACCAGCCGGACAGGGCAGAACACCGGGGAGCTGTTTTTT	1	0.0760456
TRBV15	TRBJ1-2	TRBC1	CATSSSDRFDGYTF	TGTGCCACCAGCTCGTCGGACAGGTTCGATGGCTACACCTTC	1	0.0760456
TRBV30	TRBJ1-2	TRBC1	CAWAQGYGYTF	TGTGCCTGGGCACAGGGCTATGGCTACACCTTC	1	0.0760456
TRBV30	TRBJ1-4	TRBC1	CAWDFTGVGEKLFF	TGTGCCTGGGATTTCACAGGGGTTGGTGAAAAACTGTTTTTT	1	0.0760456
TRBV30	TRBJ1-2	TRBC1	CAWDGGEDGYTF	TGTGCCTGGGATGGTGGGGAGGACGGCTACACCTTC	1	0.0760456
TRBV30	TRBJ1-2	TRBC1	CAWGLSGRSIGYTF	TGTGCCTGGGGTCTTAGCGGTCGGTCTATCGGCTACACCTTC	1	0.0760456
TRBV30	TRBJ2-7	TRBC2	CAWGLSLNRGQGEQYF	TGTGCCTGGGGGTTGTCTTTGAACAGGGGGCAGGGCGAGCAGTACTTC	1	0.0760456
TRBV30	TRBJ2-5	TRBC2	CAWRDVWQTQYF	TGTGCCTGGAGGGATGTCTGGCAGACCCAGTACTTC	1	0.0760456
TRBV30	TRBJ2-1	TRBC2	CAWSALGGSYNEQFF	TGTGCCTGGAGTGCTCTAGGAGGCTCCTACAATGAGCAGTTCTTC	1	0.0760456
TRBV30	TRBJ1-5	TRBC1	CAWSEGAGDQPQHF	TGTGCCTGGAGTGAAGGGGCGGGGGATCAGCCCCAGCATTTT	1	0.0760456
TRBV30	TRBJ2-1	TRBC2	CAWSGLADNNEQFF	TGTGCCTGGAGTGGACTAGCGGACAACAATGAGCAGTTCTTC	1	0.0760456
TRBV30	TRBJ1-1	TRBC1	CAWSLGSTEAFF	TGTGCCTGGAGTCTAGGGAGCACTGAAGCTTTCTTT	1	0.0760456
TRBV30	TRBJ1-5	TRBC1	CAWSTGGWNQPQHF	TGTGCCTGGAGTACTGGGGGGTGGAATCAGCCCCAGCATTTT	1	0.0760456
TRBV30	TRBJ1-6	TRBC1	CAWSTWEDSPLHF	TGTGCCTGGAGTACCTGGGAAGATTCACCCCTCCACTTT	1	0.0760456
TRBV30	TRBJ2-1	TRBC2	CAWSVAGAYNEQFF	TGTGCCTGGAGTGTAGCGGGGGCCTACAATGAGCAGTTCTTC	1	0.0760456
TRBV30	TRBJ2-5	TRBC2	CAWSVRGDRQETQYF	TGTGCCTGGAGTGTACGAGGGGACCGCCAAGAGACCCAGTACTTC	1	0.0760456
TRBV30	TRBJ2-6	TRBC2	CAWSVWGAGANVLTF	TGTGCCTGGAGTGTGTGGGGAGCTGGGGCCAACGTCCTGACTTTC	1	0.0760456
TRBV30	TRBJ1-2	TRBC1	CAWSWGDGYTF	TGTGCCTGGAGTTGGGGGGATGGCTACACCTTC	1	0.0760456
TRBV30	TRBJ2-7	TRBC2	CAWTGQGGTYEQYF	TGTGCCTGGACAGGACAGGGTGGGACCTACGAGCAGTACTTC	1	0.0760456
TRBV30	TRBJ2-5	TRBC2	CAWTYWGAGETQYF	TGTGCCTGGACATACTGGGGGGCCGGAGAGACCCAGTACTTC	1	0.0760456
TRBV30	TRBJ2-1	TRBC2	CAWVGPGTSGRSEQFF	TGTGCCTGGGTTGGTCCCGGGACTAGCGGGAGGAGTGAGCAGTTCTTC	1	0.0760456
TRBV29-1	TRBJ2-7	TRBC2	CSAGQPPYEQYF	TGCAGCGCGGGACAGCCCCCCTACGAGCAGTACTTC	1	0.0760456
TRBV20-1	TRBJ1-6	TRBC1	CSALQGGNSPLHF	TGCAGTGCTCTACAGGGAGGGAATTCACCCCTCCACTTT	1	0.0760456
TRBV20-1	TRBJ2-1	TRBC2	CSARDFRGSSNEQFF	TGCAGTGCTAGAGATTTCCGGGGGTCGTCCAATGAGCAGTTCTTC	1	0.0760456
TRBV20-1	TRBJ1-5	TRBC1	CSARDGQGRNQPQHF	TGCAGTGCTAGAGACGGGCAGGGTAGAAATCAGCCCCAGCATTTT	1	0.0760456
TRBV20-1	TRBJ2-7	TRBC2	CSARDPGGRAYEQYF	TGCAGTGCTAGAGATCCCGGCGGACGAGCCTACGAGCAGTACTTC	1	0.0760456
TRBV20-1	TRBJ1-2	TRBC1	CSARDRRTNYGYTF	TGCAGTGCCCGGGACCGACGGACTAACTATGGCTACACCTTC	1	0.0760456
TRBV20-1	TRBJ1-2	TRBC1	CSARDRSNYGYTF	TGCAGTGCTAGGGACAGGTCTAACTATGGCTACACCTTC	1	0.0760456
TRBV20-1	TRBJ2-5	TRBC2	CSAREALETQYF	TGCAGTGCTAGAGAGGCGCTGGAGACCCAGTACTTC	1	0.0760456
TRBV20-1	TRBJ1-6	TRBC1	CSARETGRGYSPLHF	TGCAGTGCTAGAGAAACAGGGCGAGGTTACTCACCCCTCCACTTT	1	0.0760456
TRBV20-1	TRBJ2-1	TRBC2	CSARFLAGPAGQFF	TGCAGTGCTAGATTCCTAGCGGGACCGGCGGGGCAGTTCTTC	1	0.0760456
TRBV29-1	TRBJ1-1	TRBC1	CSARPGQRAFF	TGCAGCGCTCGTCCGGGCCAGAGGGCTTTCTTT	1	0.0760456
TRBV20-1	TRBJ2-7	TRBC2	CSARPGTGFGEQYF	TGCAGTGCTAGACCGGGGACAGGGTTCGGCGAGCAGTACTTC	1	0.0760456
TRBV20-1	TRBJ1-1	TRBC1	CSARSGWMNTEAFF	TGCAGTGCCCGATCAGGGTGGATGAACACTGAAGCTTTCTTT	1	0.0760456
TRBV20-1	TRBJ2-4	TRBC2	CSARVATEIAKNIQYF	TGCAGTGCTAGAGTTGCGACAGAGATAGCCAAAAACATTCAGTACTTC	1	0.0760456
TRBV20-1	TRBJ1-1	TRBC1	CSASDGGGDTEAFF	TGCAGTGCTAGCGACGGGGGTGGGGACACTGAAGCTTTCTTT	1	0.0760456
TRBV20-1	TRBJ1-5	TRBC1	CSASEGVGNQPQHF	TGCAGTGCTAGTGAGGGAGTGGGCAATCAGCCCCAGCATTTT	1	0.0760456
TRBV29-1	TRBJ2-7	TRBC2	CSASRGLSYEQYF	TGCAGCGCCTCCCGGGGACTCTCCTACGAGCAGTACTTC	1	0.0760456
TRBV20-1	TRBJ2-1	TRBC2	CSASRLAGYNEQFF	TGCAGTGCTAGTAGGCTAGCGGGGTACAATGAGCAGTTCTTC	1	0.0760456
TRBV20-1	TRBJ1-1	TRBC1	CSEGQMNTEAFF	TGCAGTGAGGGACAAATGAACACTGAAGCTTTCTTT	1	0.0760456
TRBV29-1	TRBJ2-5	TRBC2	CSSTAGSETQYF	TGCAGTTCAACCGCAGGGTCGGAGACCCAGTACTTC	1	0.0760456
TRBV29-1	TRBJ2-1	TRBC2	CSVEAPDRSSYNEQFF	TGCAGCGTTGAAGCCCCGGACAGGAGCTCCTACAATGAGCAGTTCTTC	1	0.0760456
TRBV29-1	TRBJ2-7	TRBC2	CSVEGRGSYEQYF	TGCAGCGTTGAAGGCAGGGGCTCCTACGAGCAGTACTTC	1	0.0760456
TRBV29-1	TRBJ1-2	TRBC1	CSVESRGHGYTF	TGCAGCGTTGAAAGTAGGGGACATGGCTACACCTTC	1	0.0760456
TRBV29-1	TRBJ2-7	TRBC2	CSVEVDRGYEQYF	TGCAGCGTTGAAGTCGACAGGGGTTACGAGCAGTACTTC	1	0.0760456
TRBV29-1	TRBJ2-1	TRBC2	CSVEWWGLGPGDEQFF	TGCAGCGTTGAATGGTGGGGACTAGGGCCAGGGGATGAGCAGTTCTTC	1	0.0760456
TRBV29-1	TRBJ2-7	TRBC2	CSVMGLAGGPNQEQYF	TGCAGCGTGATGGGACTAGCGGGAGGGCCGAACCAGGAGCAGTACTTC	1	0.0760456
TRBV29-1	TRBJ1-2	TRBC1	CSVMKPGNYGYTF	TGCAGCGTTATGAAGCCGGGGAACTATGGCTACACCTTC	1	0.0760456
TRBV12-3	TRBJ2-1	TRBC2	CASSETSGPYNEQFF	TGTGCCAGCAGTGAGACTAGCGGGCCGTACAATGAGCAGTTCTTC	1	0.0760456
TRBV4-3	TRBJ2-7	TRBC3	CASSQAGTPLGYEQYF	TGTGCCAGCAGCCAAGCCGGGACCCCCCTGGGCTACGAGCAGTACTTC	1	0.0760456

## Sheet: 754
v_gene	j_gene	c_gene	cdr3	cdr3_nt	counts	frequency	phenotype	public	private
TRBV9	TRBJ1-1	TRBC1	CASSVDYRQEAFF	TGTGCCAGCAGCGTAGATTACAGGCAGGAAGCTTTCTTT	594	27	CD8	P
TRBV2	TRBJ2-7	TRBC2	CASSDRGTFEQYF	TGTGCCAGCAGTGACCGGGGTACTTTCGAGCAGTACTTC	72	3.27273	CD8	P
TRBV14	TRBJ1-3	TRBC1	CASSLGQSSGNTIYF	TGTGCCAGCAGCCTAGGACAGAGCTCTGGAAACACCATATATTTT	47	2.13636	CD8	P
TRBV5-4	TRBJ2-1	TRBC2	CASSLVPGSSYNEQFF	TGTGCCAGCAGCTTGGTCCCCGGAAGCTCCTACAATGAGCAGTTCTTC	42	1.90909	CD8	P
TRBV5-4	TRBJ2-1	TRBC2	CASSLVGGITYNEQFF	TGTGCCAGCAGCTTGGTGGGAGGGATTACTTACAATGAGCAGTTCTTC	38	1.72727	CD8	P
TRBV5-1	TRBJ2-5	TRBC2	CASSPRENRVGETQYF	TGCGCCAGCAGTCCGAGGGAAAACAGGGTTGGAGAGACCCAGTACTTC	30	1.36364	CD8	P
TRBV7-2	TRBJ2-2	TRBC2	CASSFPGRKNTGELFF	TGTGCCAGCAGCTTCCCGGGACGGAAGAACACCGGGGAGCTGTTTTTT	28	1.27273	CD8	P
TRBV7-7	TRBJ2-2	TRBC2	CASSRPGRSGELFF	TGTGCCAGCAGCCGCCCAGGGCGATCGGGGGAGCTGTTTTTT	26	1.18182	CD4	P
TRBV6-1	TRBJ2-7	TRBC2	CASSDRGLIRYEQYF	TGTGCCAGCAGTGACAGGGGGCTCATCCGATACGAGCAGTACTTC	25	1.13636	CD8	P
TRBV12-4	TRBJ2-1	TRBC2	CASSPRRTSGYNEQFF	TGTGCCAGCAGTCCCCGGAGGACTAGCGGCTACAATGAGCAGTTCTTC	25	1.13636	CD8	P
TRBV12-4	TRBJ2-5	TRBC2	CASSLGTGYQETQYF	TGTGCCAGCAGTTTGGGGACAGGGTACCAAGAGACCCAGTACTTC	24	1.09091	CD4	P
TRBV28	TRBJ2-7	TRBC2	CASSLGGSYEQYF	TGTGCCAGCAGCCTGGGGGGTTCCTACGAGCAGTACTTC	23	1.04545	CD8	P
TRBV10-3	TRBJ2-4	TRBC2	CAISESRGADLLAKNIQYF*	TGTGCCATCAGTGAGTCGCGGGGGGCCGACTTACTAGCCAAAAACATTCAGTACTTC	23	1.04545	CD8	P
TRBV7-9	TRBJ1-2	TRBC1	CASSLWRGLNYGYTF	TGTGCCAGCAGCTTATGGAGGGGTTTAAACTATGGCTACACCTTC	22	1	CD8	P
TRBV5-1	TRBJ1-1	TRBC1	CASSVETVTGTEAFF	TGCGCCAGCAGCGTCGAGACAGTCACGGGCACTGAAGCTTTCTTT	146	6.63636	CD8		P
TRBV25-1	TRBJ1-2	TRBC1	CASSESGPQKGYTF	TGTGCCAGCAGTGAATCGGGGCCACAAAAAGGCTACACCTTC	78	3.54545	CD8		P
TRBV11-1	TRBJ2-1	TRBC2	CASSLDGIGLAVFEPSNEQFF	TGTGCCAGCAGCTTAGATGGTATAGGACTAGCGGTCTTTGAACCTAGCAATGAGCAGTTCTTC	75	3.40909	CD8		P
TRBV6-5	TRBJ1-3	TRBC1	CASSYSFVTGGQEWSGNTIYF	TGTGCCAGCAGTTACTCGTTTGTAACAGGGGGACAGGAGTGGTCTGGAAACACCATATATTTT	63	2.86364	CD8		P
TRBV4-3	TRBJ1-2	TRBC1	CASSQDGADYDGYTF	TGCGCCAGCAGCCAAGATGGGGCAGACTATGATGGCTACACCTTC	51	2.31818	CD8		P
TRBV2	TRBJ2-7	TRBC2	CASSEIWDRGSLEQYF	TGTGCCAGCAGTGAGATTTGGGACAGGGGTTCCCTCGAGCAGTACTTC	26	1.18182	CD8		P
TRBV15	TRBJ2-3	TRBC2	CAVEGPGLAQIADTQYF	TGTGCCGTAGAAGGACCGGGACTAGCGCAAATCGCAGATACGCAGTATTTT	22	1	CD8		P
TRBV7-9	TRBJ1-2	TRBC1	CASSSQGYGYTF	TGTGCCAGCAGCTCACAGGGGTATGGCTACACCTTC	21	0.954545
TRBV5-4	TRBJ1-1	TRBC1	CASSLDRGSTYAAFF	TGTGCCAGCAGCTTGGACAGGGGATCGACCTATGCGGCTTTCTTT	19	0.863636
TRBV28	TRBJ2-5	TRBC2	CASSFYISSYQETQYF	TGTGCCAGCAGTTTCTACATCTCAAGCTACCAAGAGACCCAGTACTTC	19	0.863636
TRBV28	TRBJ1-2	TRBC1	CASTLLHPTGSYGYTF	TGTGCCAGCACGTTGTTACATCCAACAGGGTCCTATGGCTACACCTTC	16	0.727273
TRBV30	TRBJ1-2	TRBC1	CAWSPNTGGAGYTF	TGTGCCTGGAGCCCCAATACAGGGGGCGCAGGCTACACCTTC	13	0.590909
TRBV7-2	TRBJ2-7	TRBC2	CASSFWGNPLDEQYF	TGTGCCAGCAGCTTCTGGGGCAACCCTCTGGACGAGCAGTACTTC	12	0.545455
TRBV30	TRBJ2-1	TRBC2	CAWTTSGSSYNEQFF	TGTGCCTGGACGACTAGCGGGAGCTCCTACAATGAGCAGTTCTTC	12	0.545455
TRBV25-1	TRBJ1-1	TRBC1	CASSEWGVSSNTEAFF	TGTGCCAGCAGTGAATGGGGGGTCAGTTCGAACACTGAAGCTTTCTTT	7	0.318182
TRBV7-4	TRBJ2-2	TRBC2	CASSLAQTGELFF	TGTGCCAGCAGCCTTGCTCAAACCGGGGAGCTGTTTTTT	7	0.318182
TRBV3-1	TRBJ2-7	TRBC2	CASSQSVHEQYF	TGTGCCAGCAGCCAATCCGTCCACGAGCAGTACTTC	7	0.318182
TRBV4-1	TRBJ2-7	TRBC2	CASSRRGGSYEQYF	TGCGCCAGCAGCCGCCGGGGGGGCTCCTACGAGCAGTACTTC	7	0.318182
TRBV6-2	TRBJ1-5	TRBC1	CASSYTHSNQPQHF	TGTGCCAGCAGTTACACCCATAGCAATCAGCCCCAGCATTTT	7	0.318182
TRBV6-2	TRBJ2-1	TRBC2	CASTGLAGTYNEQFF	TGTGCCAGCACCGGACTAGCGGGAACCTACAATGAGCAGTTCTTC	7	0.318182
TRBV12-5	TRBJ2-3	TRBC2	CASGLARVKREEPQYF	TGTGCTAGTGGTTTGGCTAGGGTAAAGCGGGAGGAACCACAGTATTTT	6	0.272727
TRBV28	TRBJ2-1	TRBC2	CASSFTSYNEQFF	TGTGCCAGCAGTTTTACTTCATACAATGAGCAGTTCTTC	6	0.272727
TRBV27	TRBJ1-4	TRBC1	CASSLWPGYEKLFF	TGTGCCAGCAGTTTATGGCCAGGGTATGAAAAACTGTTTTTT	6	0.272727
TRBV4-2	TRBJ2-1	TRBC2	CASSQELLAGPNNEQFF	TGTGCCAGCAGCCAAGAACTCCTAGCGGGACCAAACAATGAGCAGTTCTTC	6	0.272727
TRBV2	TRBJ1-1	TRBC1	CASSVQNTEAFF	TGTGCCAGCAGTGTACAGAACACTGAAGCTTTCTTT	6	0.272727
TRBV30	TRBJ2-6	TRBC2	CAWIPGRLSGANVLTF	TGTGCCTGGATTCCGGGACGGCTATCTGGGGCCAACGTCCTGACTTTC	6	0.272727
TRBV6-2	TRBJ1-1	TRBC1	CASRKATGVGTEAFF	TGTGCCAGCAGAAAGGCGACAGGGGTGGGGACTGAAGCTTTCTTT	5	0.227273
TRBV12-4	TRBJ1-1	TRBC1	CASSLADTLNTEAFF	TGTGCCAGCAGTTTAGCTGACACACTGAACACTGAAGCTTTCTTT	5	0.227273
TRBV7-6	TRBJ2-1	TRBC2	CASSLGGPIPGLQYNEQFF	TGTGCCAGCAGCTTAGGGGGACCTATTCCGGGACTCCAGTACAATGAGCAGTTCTTC	5	0.227273
TRBV6-2	TRBJ2-4	TRBC2	CASSYSWDRENIQYF	TGTGCCAGCAGTTACTCGTGGGACAGGGAAAACATTCAGTACTTC	5	0.227273
TRBV19	TRBJ2-3	TRBC2	CATSPGDYPDTQYF	TGTGCCACCTCTCCGGGGGACTACCCAGATACGCAGTATTTT	5	0.227273
TRBV2	TRBJ2-1	TRBC2	CASGGSKGQRHYNEQFF	TGTGCCAGCGGGGGCTCTAAGGGACAGCGACACTACAATGAGCAGTTCTTC	4	0.181818
TRBV2	TRBJ1-2	TRBC1	CASSDFTGKWDGYTF	TGTGCCAGCAGTGATTTCACGGGGAAGTGGGATGGCTACACCTTC	4	0.181818
TRBV9	TRBJ2-1	TRBC2	CASSGDYNEQFF	TGTGCCAGCAGCGGGGACTACAATGAGCAGTTCTTC	4	0.181818
TRBV12-4	TRBJ2-6	TRBC2	CASSLPTSGGDQSSGANVLTF	TGTGCCAGCAGTCTGCCGACTAGCGGGGGGGATCAGAGCTCTGGGGCCAACGTCCTGACTTTC	4	0.181818
TRBV6-5	TRBJ1-2	TRBC1	CASSSDFMGYTF	TGTGCCAGCAGTAGTGACTTTATGGGCTACACCTTC	4	0.181818
TRBV20-1	TRBJ2-5	TRBC2	CSARDRQPRETQYF	TGCAGTGCTAGAGATCGGCAGCCCAGGGAGACCCAGTACTTC	4	0.181818
TRBV20-1	TRBJ1-5	TRBC1	CSARETTGAFQPQHF	TGCAGTGCTAGAGAGACGACAGGGGCATTTCAGCCCCAGCATTTT	4	0.181818
TRBV29-1	TRBJ2-5	TRBC2	CSVGGVRTQYF	TGCAGCGTTGGGGGCGTGCGGACCCAGTACTTC	4	0.181818
TRBV3-1	TRBJ2-7	TRBC2	CASGAEYTYF	TGTGCCAGCGGTGCGGAATATACGTACTTC	3	0.136364
TRBV6-1	TRBJ1-2	TRBC1	CASGSSPVDYGYTF	TGTGCCAGCGGGTCTTCCCCCGTGGACTATGGCTACACCTTC	3	0.136364
TRBV11-2	TRBJ1-1	TRBC1	CASRLQGAQGTEAFF	TGTGCCAGCAGGCTACAGGGGGCGCAAGGCACTGAAGCTTTCTTT	3	0.136364
TRBV27	TRBJ1-2	TRBC1	CASRQGYGYTF	TGTGCCAGCAGACAGGGCTATGGCTACACCTTC	3	0.136364
TRBV9	TRBJ1-1	TRBC1	CASSAQGQMNTEAFF	TGTGCCAGCAGCGCCCAAGGACAGATGAACACTGAAGCTTTCTTT	3	0.136364
TRBV5-1	TRBJ2-3	TRBC2	CASSLFGDTDTQYF	TGCGCCAGCAGCTTGTTCGGGGACACAGATACGCAGTATTTT	3	0.136364
TRBV5-5	TRBJ1-5	TRBC1	CASSLGGYNQPQHF	TGTGCCAGCAGCTTGGGGGGGTACAATCAGCCCCAGCATTTT	3	0.136364
TRBV5-1	TRBJ2-1	TRBC2	CASSLGHSSSYNEQFF	TGCGCCAGCAGCTTGGGTCACAGTAGCTCCTACAATGAGCAGTTCTTC	3	0.136364
TRBV7-3	TRBJ2-1	TRBC2	CASSLGLAGGNLYNEQFF	TGTGCCAGCAGCCTGGGACTAGCGGGAGGGAACCTCTACAATGAGCAGTTCTTC	3	0.136364
TRBV5-1	TRBJ1-6	TRBC1	CASSPAGWSYNSPLHF	TGCGCCAGCAGCCCCGCCGGTTGGAGCTATAATTCACCCCTCCACTTT	3	0.136364
TRBV18	TRBJ2-7	TRBC2	CASSPTVDPASHEQYF	TGTGCCAGCTCACCGACCGTGGACCCAGCTTCCCACGAGCAGTACTTC	3	0.136364
TRBV9	TRBJ2-7	TRBC2	CASSVASGKAYEQYF	TGTGCCAGCAGCGTAGCTAGCGGGAAGGCCTACGAGCAGTACTTC	3	0.136364
TRBV9	TRBJ1-6	TRBC1	CASSVDFDGPLHF	TGTGCCAGCAGCGTAGATTTTGATGGACCCCTCCACTTT	3	0.136364
TRBV7-9	TRBJ2-3	TRBC2	CASSWTDRVKSWDTQYF	TGTGCCAGCAGCTGGACTGACAGGGTCAAGTCATGGGATACGCAGTATTTT	3	0.136364
TRBV30	TRBJ1-4	TRBC1	CAWMGGTGGEKLFF	TGTGCCTGGATGGGAGGGACGGGCGGTGAAAAACTGTTTTTT	3	0.136364
TRBV20-1	TRBJ2-1	TRBC2	CSAPTPSGGEYNEQFF	TGCAGTGCTCCCACTCCTAGCGGGGGGGAGTACAATGAGCAGTTCTTC	3	0.136364
TRBV20-1	TRBJ2-7	TRBC2	CSAREISGRGDEQYF	TGCAGTGCTAGAGAAATAAGCGGGAGGGGCGACGAGCAGTACTTC	3	0.136364
TRBV10-3	TRBJ1-2	TRBC1	CAISEATDPPEGVNYGYTF	TGTGCCATCAGTGAGGCGACAGATCCGCCCGAGGGAGTGAACTATGGCTACACCTTC	2	0.0909091
TRBV10-3	TRBJ1-2	TRBC1	CAISESVSGRGYGYTF	TGTGCCATCAGTGAGTCGGTTTCTGGCAGGGGATATGGCTACACCTTC	2	0.0909091
TRBV13	TRBJ1-1	TRBC1	CASATGNTEAFF	TGTGCCAGTGCTACAGGTAACACTGAAGCTTTCTTT	2	0.0909091
TRBV6-6	TRBJ2-2	TRBC2	CASGGRGNTGELFF	TGTGCCAGCGGGGGGCGGGGGAACACCGGGGAGCTGTTTTTT	2	0.0909091
TRBV6-2	TRBJ2-7	TRBC2	CASKRTGDTYEQYF	TGTGCCAGCAAACGGACAGGGGACACCTACGAGCAGTACTTC	2	0.0909091
TRBV2	TRBJ2-1	TRBC2	CASRDTSGRAWEQFF	TGTGCCAGCAGAGATACTAGCGGGAGGGCCTGGGAGCAGTTCTTC	2	0.0909091
TRBV19	TRBJ1-2	TRBC1	CASRKIQGVKGGYTF	TGTGCCAGTAGGAAAATACAGGGCGTTAAGGGTGGCTACACCTTC	2	0.0909091
TRBV6-2	TRBJ2-7	TRBC2	CASRKLAGGPNEQYF	TGTGCCAGCAGAAAACTAGCGGGAGGGCCCAACGAGCAGTACTTC	2	0.0909091
TRBV5-5	TRBJ2-1	TRBC2	CASRKLMGFGNEQFF	TGTGCCAGCAGAAAACTTATGGGGTTCGGCAATGAGCAGTTCTTC	2	0.0909091
TRBV6-5	TRBJ1-3	TRBC1	CASRLRTGSGNTIYF	TGTGCCAGCAGACTGAGGACAGGGTCTGGAAACACCATATATTTT	2	0.0909091
TRBV6-6	TRBJ1-1	TRBC1	CASRNRGRTEAFF	TGTGCCAGCAGGAACAGGGGGAGAACTGAAGCTTTCTTT	2	0.0909091
TRBV6-6	TRBJ2-2	TRBC2	CASRWGSVAGELFF	TGTGCCAGCAGATGGGGTTCTGTAGCCGGGGAGCTGTTTTTT	2	0.0909091
TRBV27	TRBJ2-7	TRBC2	CASSFHRPLYEQYF	TGTGCCAGCAGTTTCCACCGGCCCCTGTACGAGCAGTACTTC	2	0.0909091
TRBV28	TRBJ1-6	TRBC1	CASSHRRLVSGAGDSPLHF	TGTGCCAGCAGTCATCGGCGTCTAGTTTCGGGGGCGGGGGATTCACCCCTCCACTTT	2	0.0909091
TRBV3-1	TRBJ2-7	TRBC2	CASSHWAGDPFEQYF	TGTGCCAGCAGCCACTGGGCGGGAGACCCCTTCGAGCAGTACTTC	2	0.0909091
TRBV19	TRBJ2-3	TRBC2	CASSISARTTGQYF	TGTGCCAGTAGTATATCGGCCCGGACTACGGGGCAGTATTTT	2	0.0909091
TRBV13	TRBJ1-1	TRBC1	CASSLDRVMNTEAFF	TGTGCCAGCAGCTTAGACAGAGTCATGAACACTGAAGCTTTCTTT	2	0.0909091
TRBV5-1	TRBJ1-5	TRBC1	CASSLEGDKPQHF	TGCGCCAGCAGCTTAGAGGGTGATAAGCCCCAGCATTTT	2	0.0909091
TRBV12-4	TRBJ1-2	TRBC1	CASSLFYRRNAINYGYTF	TGTGCCAGCAGTTTATTTTACAGGAGAAATGCCATTAACTATGGCTACACCTTC	2	0.0909091
TRBV7-6	TRBJ2-1	TRBC2	CASSLGLAGYSEQFF	TGTGCCAGCAGCCTTGGACTAGCGGGATATAGTGAGCAGTTCTTC	2	0.0909091
TRBV7-2	TRBJ2-2	TRBC2	CASSLVGTVTGELFF	TGTGCCAGCAGCTTAGTTGGGACAGTCACCGGGGAGCTGTTTTTT	2	0.0909091
TRBV7-6	TRBJ1-2	TRBC1	CASSLVQGQGYTF	TGTGCCAGCAGCTTAGTTCAGGGCCAAGGCTACACCTTC	2	0.0909091
TRBV5-4	TRBJ1-2	TRBC1	CASSPGQGGYGYTF	TGTGCCAGCAGCCCCGGCCAGGGCGGGTATGGCTACACCTTC	2	0.0909091
TRBV12-3	TRBJ1-6	TRBC1	CASSPRTGNNSPLHF	TGTGCCAGCAGCCCGCGGACAGGAAATAATTCACCCCTCCACTTT	2	0.0909091
TRBV7-3	TRBJ2-1	TRBC2	CASSPWGLTSYNEQFF	TGTGCCAGCAGCCCGTGGGGACTGACCTCCTACAATGAGCAGTTCTTC	2	0.0909091
TRBV4-1	TRBJ1-2	TRBC1	CASSQDFGTGIGYTF	TGCGCCAGCAGCCAAGATTTTGGGACAGGAATTGGCTACACCTTC	2	0.0909091
TRBV2	TRBJ2-7	TRBC2	CASSRGTGQYF	TGTGCCAGCAGTAGAGGCACGGGGCAGTACTTC	2	0.0909091
TRBV6-5	TRBJ1-2	TRBC1	CASSRSLLYGYTF	TGTGCCAGCAGTCGGAGCCTTCTTTATGGCTACACCTTC	2	0.0909091
TRBV5-4	TRBJ2-4	TRBC2	CASSSAGLTKNIQYF	TGTGCCAGCAGCTCAGCAGGGTTAACCAAAAACATTCAGTACTTC	2	0.0909091
TRBV7-9	TRBJ1-1	TRBC1	CASSSPRQVVSTEAFF	TGTGCCAGCAGCTCCCCCCGACAGGTTGTAAGCACTGAAGCTTTCTTT	2	0.0909091
TRBV9	TRBJ1-3	TRBC1	CASSVGNTIYF	TGTGCCAGCAGCGTGGGAAACACCATATATTTT	2	0.0909091
TRBV7-2	TRBJ2-5	TRBC2	CASSWAYQETQYF	TGTGCCAGCAGCTGGGCATACCAAGAGACCCAGTACTTC	2	0.0909091
TRBV6-5	TRBJ1-6	TRBC1	CASSYAGGGGQSNSPLHF	TGTGCCAGCAGTTACGCAGGCGGCGGGGGACAGAGTAATTCACCCCTCCACTTT	2	0.0909091
TRBV6-5	TRBJ2-2	TRBC2	CASSYLLTGELFF	TGTGCCAGCAGTTACCTTCTCACCGGGGAGCTGTTTTTT	2	0.0909091
TRBV7-2	TRBJ1-1	TRBC1	CASSYPVGGARTEAFF	TGTGCCAGCAGCTACCCCGTGGGAGGAGCACGGACTGAAGCTTTCTTT	2	0.0909091
TRBV6-5	TRBJ2-1	TRBC2	CASSYSPPGLAGTSYNEQFF	TGTGCCAGCAGTTACAGCCCTCCGGGACTAGCGGGGACCTCCTACAATGAGCAGTTCTTC	2	0.0909091
TRBV15	TRBJ2-1	TRBC2	CATEGLAGNEQFF	TGTGCCACCGAGGGACTAGCGGGAAATGAGCAGTTCTTC	2	0.0909091
TRBV15	TRBJ2-5	TRBC2	CATSGWWVGGRSLETQYF	TGTGCCACCAGCGGCTGGTGGGTTGGCGGGAGATCATTGGAGACCCAGTACTTC	2	0.0909091
TRBV20-1	TRBJ2-3	TRBC2	CSADSRTDTQYF	TGCAGTGCAGACAGCCGCACAGATACGCAGTATTTT	2	0.0909091
TRBV20-1	TRBJ1-5	TRBC1	CSALGQVGAHQPQHF	TGCAGTGCTCTCGGACAGGTAGGCGCCCATCAGCCCCAGCATTTT	2	0.0909091
TRBV20-1	TRBJ2-1	TRBC2	CSARGTLSYNEQFF	TGCAGTGCTAGGGGGACACTCTCCTACAATGAGCAGTTCTTC	2	0.0909091
TRBV29-1	TRBJ2-1	TRBC2	CSVKRENVNEQFF	TGCAGCGTAAAACGGGAGAACGTCAATGAGCAGTTCTTC	2	0.0909091
TRBV29-1	TRBJ1-1	TRBC1	CSVYWGWTEAFF	TGCAGCGTTTATTGGGGCTGGACTGAAGCTTTCTTT	2	0.0909091
TRBV11-2	TRBJ1-1	TRBC1	CAIPGDRGGTEAFF	TGTGCCATTCCAGGAGACAGGGGGGGCACTGAAGCTTTCTTT	1	0.0454545
TRBV10-3	TRBJ1-1	TRBC1	CAIRNRVQTEMNTEAFF	TGTGCCATCCGAAACCGGGTCCAGACAGAAATGAACACTGAAGCTTTCTTT	1	0.0454545
TRBV10-3	TRBJ1-1	TRBC1	CAISEPRGGEWTEAFF	TGTGCCATCAGTGAGCCCCGTGGGGGCGAATGGACTGAAGCTTTCTTT	1	0.0454545
TRBV10-3	TRBJ2-5	TRBC2	CAISRTGDETQYF	TGTGCCATCAGCCGGACAGGGGACGAGACCCAGTACTTC	1	0.0454545
TRBV10-3	TRBJ2-3	TRBC2	CAISSGTGLSTDTQYF	TGTGCCATCAGTTCCGGGACAGGGCTAAGCACAGATACGCAGTATTTT	1	0.0454545
TRBV19	TRBJ1-1	TRBC1	CASAQGRGTEAFF	TGTGCCAGCGCACAGGGTCGGGGGACTGAAGCTTTCTTT	1	0.0454545
TRBV6-2	TRBJ2-1	TRBC2	CASGGSGRLEQFF	TGTGCCAGCGGGGGTAGCGGGAGGTTGGAGCAGTTCTTC	1	0.0454545
TRBV12-5	TRBJ2-1	TRBC2	CASGLYGGVRFF	TGTGCTAGTGGTTTGTACGGGGGGGTGCGGTTCTTC	1	0.0454545
TRBV6-1	TRBJ1-2	TRBC1	CASGMAGYKGGYTF	TGTGCCAGCGGGATGGCAGGGTACAAAGGTGGCTACACCTTC	1	0.0454545
TRBV19	TRBJ1-2	TRBC1	CASHNLYLRDRGYTF	TGTGCCAGCCATAACCTTTACCTCCGGGACAGGGGCTACACCTTC	1	0.0454545
TRBV6-5	TRBJ1-1	TRBC1	CASIRGGLNTEAFF	TGTGCCAGCATACGAGGAGGTTTAAACACTGAAGCTTTCTTT	1	0.0454545
TRBV27	TRBJ2-1	TRBC2	CASISGGVYNEQFF	TGTGCCAGCATAAGCGGGGGGGTATACAATGAGCAGTTCTTC	1	0.0454545
TRBV28	TRBJ2-3	TRBC2	CASITFRDRGANTQYF	TGTGCCAGCATTACCTTCCGGGACAGGGGGGCGAATACGCAGTATTTT	1	0.0454545
TRBV19	TRBJ2-7	TRBC2	CASKLRDGGGYEQYF	TGTGCCAGTAAACTCCGGGACGGTGGCGGATACGAGCAGTACTTC	1	0.0454545
TRBV19	TRBJ2-1	TRBC2	CASKMGSRLNEQFF	TGTGCCAGTAAGATGGGCAGCAGACTCAATGAGCAGTTCTTC	1	0.0454545
TRBV19	TRBJ2-1	TRBC2	CASKPFSGGTYNEQFF	TGTGCCAGTAAGCCCTTCTCGGGGGGGACCTACAATGAGCAGTTCTTC	1	0.0454545
TRBV6-2	TRBJ2-7	TRBC2	CASKRTGDTYEQYF	TGTGCCAGCAAACGGACAGGGGACACCTACGAGCAGTACTTC	1	0.0454545
TRBV5-5	TRBJ2-7	TRBC2	CASMGGVEFYEQYF	TGTGCCAGCATGGGCGGGGTGGAGTTCTACGAGCAGTACTTC	1	0.0454545
TRBV12-4	TRBJ1-5	TRBC1	CASNIGGVHQPQHF	TGTGCCAGCAATATCGGCGGGGTTCATCAGCCCCAGCATTTT	1	0.0454545
TRBV6-1	TRBJ2-7	TRBC2	CASNRGLYEQYF	TGTGCCAGCAACAGGGGGCTCTACGAGCAGTACTTC	1	0.0454545
TRBV19	TRBJ2-1	TRBC2	CASRDQGTGLSEQFF	TGTGCCAGTAGGGACCAAGGGACAGGGCTAAGTGAGCAGTTCTTC	1	0.0454545
TRBV12-3	TRBJ1-2	TRBC1	CASRDTGVYGYTF	TGTGCCAGCAGGGACACAGGGGTCTATGGCTACACCTTC	1	0.0454545
TRBV7-2	TRBJ1-1	TRBC1	CASRGLNTEAFF	TGTGCCAGCAGGGGGTTGAACACTGAAGCTTTCTTT	1	0.0454545
TRBV28	TRBJ2-7	TRBC2	CASRHGQGQYF	TGTGCCAGCAGACATGGACAGGGTCAGTACTTC	1	0.0454545
TRBV6-5	TRBJ2-7	TRBC2	CASRKRSIGNEQYF	TGTGCCAGCAGAAAAAGGTCGATCGGCAACGAGCAGTACTTC	1	0.0454545
TRBV5-4	TRBJ1-1	TRBC1	CASRLGGTANTEAFF	TGTGCCAGCAGATTGGGTGGGACAGCGAACACTGAAGCTTTCTTT	1	0.0454545
TRBV28	TRBJ1-6	TRBC1	CASRQGAFRDSPLHF	TGTGCCAGCAGGCAGGGGGCCTTTAGGGATTCACCCCTCCACTTT	1	0.0454545
TRBV7-2	TRBJ2-1	TRBC2	CASRRGAEQFF	TGTGCCAGCCGGCGGGGGGCGGAGCAGTTCTTC	1	0.0454545
TRBV10-2	TRBJ2-7	TRBC2	CASRSGAYEQYF	TGCGCCAGCAGGTCAGGGGCCTACGAGCAGTACTTC	1	0.0454545
TRBV5-1	TRBJ1-1	TRBC1	CASSAAGSYTEAFF	TGCGCCAGCAGCGCGGCCGGATCGTACACTGAAGCTTTCTTT	1	0.0454545
TRBV9	TRBJ1-1	TRBC1	CASSAEQGNTEAFF	TGTGCCAGCAGCGCCGAACAGGGGAACACTGAAGCTTTCTTT	1	0.0454545
TRBV9	TRBJ2-2	TRBC2	CASSALAEANTGELFF	TGTGCCAGCAGCGCCCTAGCCGAGGCGAACACCGGGGAGCTGTTTTTT	1	0.0454545
TRBV5-1	TRBJ2-3	TRBC2	CASSALAGARPSTDTQYF	TGCGCCAGCAGCGCACTAGCGGGAGCTCGCCCTAGCACAGATACGCAGTATTTT	1	0.0454545
TRBV6-1	TRBJ1-2	TRBC1	CASSANTGVGGYTF	TGTGCCAGCAGTGCAAATACAGGGGTCGGTGGCTACACCTTC	1	0.0454545
TRBV5-6	TRBJ2-3	TRBC2	CASSAPGQSTDTQYF	TGTGCCAGCAGCGCCCCAGGGCAATCCACAGATACGCAGTATTTT	1	0.0454545
TRBV12-4	TRBJ1-1	TRBC1	CASSASDTNTEAFF	TGTGCCAGCAGCGCGTCGGACACGAACACTGAAGCTTTCTTT	1	0.0454545
TRBV12-4	TRBJ2-3	TRBC2	CASSATGGRGDTQYF	TGTGCCAGCAGTGCCACGGGGGGCAGGGGAGATACGCAGTATTTT	1	0.0454545
TRBV6-4	TRBJ2-1	TRBC2	CASSDGAGGPDEQFF	TGTGCCAGCAGTGACGGGGCGGGAGGGCCAGATGAGCAGTTCTTC	1	0.0454545
TRBV6-2	TRBJ1-5	TRBC1	CASSDNYRNQPQHF	TGTGCCAGCAGTGACAACTATCGGAATCAGCCCCAGCATTTT	1	0.0454545
TRBV2	TRBJ1-2	TRBC1	CASSDTGLGGYTF	TGTGCCAGCAGTGATACGGGGTTAGGTGGCTACACCTTC	1	0.0454545
TRBV2	TRBJ2-7	TRBC2	CASSEAGGAFGEQYF	TGTGCCAGCAGTGAAGCCGGGGGGGCCTTTGGCGAGCAGTACTTC	1	0.0454545
TRBV2	TRBJ2-2	TRBC2	CASSEARGRTGELFF	TGTGCCAGCAGTGAAGCGCGGGGTAGAACCGGGGAGCTGTTTTTT	1	0.0454545
TRBV2	TRBJ2-3	TRBC2	CASSEGLAGTDTQYF	TGTGCCAGCAGTGAAGGGCTAGCGGGCACAGATACGCAGTATTTT	1	0.0454545
TRBV2	TRBJ2-1	TRBC2	CASSEGPPREQFF	TGTGCCAGCAGTGAAGGACCCCCCCGGGAGCAGTTCTTC	1	0.0454545
TRBV19	TRBJ1-5	TRBC1	CASSEGSYVGNQPQHF	TGTGCCAGTAGTGAGGGGAGTTACGTGGGCAATCAGCCCCAGCATTTT	1	0.0454545
TRBV2	TRBJ2-5	TRBC2	CASSERAGPQETQYF	TGTGCCAGCAGTGAAAGGGCGGGGCCCCAAGAGACCCAGTACTTC	1	0.0454545
TRBV11-1	TRBJ2-3	TRBC2	CASSERQASTDTQYF	TGTGCCAGCAGCGAAAGACAGGCCAGCACAGATACGCAGTATTTT	1	0.0454545
TRBV2	TRBJ2-2	TRBC2	CASSETAPGTGELFF	TGTGCCAGCAGTGAAACTGCCCCAGGGACCGGGGAGCTGTTTTTT	1	0.0454545
TRBV12-4	TRBJ2-5	TRBC2	CASSETGATQETQYF	TGTGCCAGCAGTGAGACAGGGGCTACCCAAGAGACCCAGTACTTC	1	0.0454545
TRBV2	TRBJ2-4	TRBC2	CASSEWGGVGAQGYKNIQYF	TGTGCCAGCAGTGAATGGGGGGGGGTTGGGGCACAAGGGTACAAAAACATTCAGTACTTC	1	0.0454545
TRBV28	TRBJ1-1	TRBC1	CASSFFPSSAFF	TGTGCCAGCAGTTTTTTTCCGAGCTCGGCTTTCTTT	1	0.0454545
TRBV7-6	TRBJ1-2	TRBC1	CASSFGRLYGYTF	TGTGCCAGCAGCTTCGGCAGACTCTATGGCTACACCTTC	1	0.0454545
TRBV5-5	TRBJ2-1	TRBC2	CASSFHGQGGGDEQFF	TGTGCCAGCAGCTTTCATGGCCAAGGCGGTGGCGATGAGCAGTTCTTC	1	0.0454545
TRBV7-2	TRBJ2-3	TRBC2	CASSFHGRSDTQYF	TGTGCCAGCAGCTTCCACGGGAGGTCAGATACGCAGTATTTT	1	0.0454545
TRBV5-6	TRBJ2-7	TRBC2	CASSFKLAGAYYEQYF	TGTGCCAGCAGCTTTAAACTAGCGGGAGCCTACTACGAGCAGTACTTC	1	0.0454545
TRBV28	TRBJ2-2	TRBC2	CASSFLTGGSGELFF	TGTGCCAGCAGTTTCCTAACAGGGGGCAGCGGGGAGCTGTTTTTT	1	0.0454545
TRBV27	TRBJ2-1	TRBC2	CASSFPGGPRNEQFF	TGTGCCAGCAGTTTTCCGGGAGGGCCTAGAAATGAGCAGTTCTTC	1	0.0454545
TRBV28	TRBJ1-1	TRBC1	CASSFQDKRLPLNTEAFF	TGTGCCAGCAGTTTTCAGGACAAGCGCCTACCCTTGAACACTGAAGCTTTCTTT	1	0.0454545
TRBV7-8	TRBJ1-2	TRBC1	CASSFRASSPSGYTF	TGTGCCAGCAGCTTCAGGGCCTCTTCCCCAAGTGGCTACACCTTC	1	0.0454545
TRBV7-3	TRBJ2-2	TRBC2	CASSFSRVGNTGELFF	TGTGCCAGCAGTTTTAGCAGGGTGGGGAACACCGGGGAGCTGTTTTTT	1	0.0454545
TRBV28	TRBJ2-3	TRBC2	CASSFYKSTDTQYF	TGTGCCAGCAGTTTCTATAAATCCACAGATACGCAGTATTTT	1	0.0454545
TRBV28	TRBJ2-3	TRBC2	CASSGSTDTQYF	TGTGCCAGCAGCGGGTCCACAGATACGCAGTATTTT	1	0.0454545
TRBV7-9	TRBJ2-6	TRBC2	CASSGTGGISGANVLTF	TGTGCCAGCAGCGGGACAGGGGGGATATCTGGGGCCAACGTCCTGACTTTC	1	0.0454545
TRBV6-2	TRBJ2-1	TRBC2	CASSHNNEQFF	TGTGCCAGCAGCCACAACAATGAGCAGTTCTTC	1	0.0454545
TRBV7-9	TRBJ1-5	TRBC1	CASSHNRGQGGEQPQHF	TGTGCCAGCAGCCACAATAGGGGACAGGGGGGAGAGCAGCCCCAGCATTTT	1	0.0454545
TRBV3-1	TRBJ2-2	TRBC2	CASSHRDLNTGELFF	TGTGCCAGCAGCCATCGGGACTTGAACACCGGGGAGCTGTTTTTT	1	0.0454545
TRBV3-1	TRBJ1-1	TRBC1	CASSHTRAMNTEAFF	TGTGCCAGCAGCCATACTCGGGCAATGAACACTGAAGCTTTCTTT	1	0.0454545
TRBV4-2	TRBJ1-2	TRBC1	CASSHVGQTHGYTF	TGTGCCAGCAGCCATGTGGGACAGACGCATGGCTACACCTTC	1	0.0454545
TRBV19	TRBJ1-2	TRBC1	CASSIDVGGYGYTF	TGTGCCAGTAGTATAGACGTGGGCGGCTATGGCTACACCTTC	1	0.0454545
TRBV19	TRBJ1-2	TRBC1	CASSIGQGGYTF	TGTGCCAGTAGTATCGGACAGGGTGGCTACACCTTC	1	0.0454545
TRBV28	TRBJ1-2	TRBC1	CASSIGQGVGGYTF	TGTGCCAGCAGTATAGGACAGGGGGTGGGTGGCTACACCTTC	1	0.0454545
TRBV27	TRBJ2-5	TRBC2	CASSIIQGVQETQYF	TGTGCCAGCAGTATAATACAGGGGGTACAAGAGACCCAGTACTTC	1	0.0454545
TRBV19	TRBJ2-1	TRBC2	CASSILRGLSYNEQFF	TGTGCCAGTAGTATCCTCAGGGGGCTTTCCTACAATGAGCAGTTCTTC	1	0.0454545
TRBV19	TRBJ2-6	TRBC2	CASSIMGGTSGANVLTF	TGTGCCAGTAGTATTATGGGGGGTACCTCTGGGGCCAACGTCCTGACTTTC	1	0.0454545
TRBV28	TRBJ2-7	TRBC2	CASSIPPGQGIREQYF	TGTGCCAGCAGCATTCCTCCGGGACAGGGGATAAGAGAGCAGTACTTC	1	0.0454545
TRBV5-1	TRBJ2-1	TRBC2	CASSIRRGSSYNEQFF	TGCGCCAGCAGCATCCGGCGGGGGAGCTCCTACAATGAGCAGTTCTTC	1	0.0454545
TRBV19	TRBJ2-2	TRBC2	CASSITSGVMNTGELFF	TGTGCCAGTAGTATAACTAGCGGAGTGATGAACACCGGGGAGCTGTTTTTT	1	0.0454545
TRBV19	TRBJ2-7	TRBC2	CASSITSRLAGPYEQYF	TGTGCCAGTAGTATAACCTCGCGACTAGCGGGACCCTACGAGCAGTACTTC	1	0.0454545
TRBV14	TRBJ2-1	TRBC2	CASSIWGGGWNEQFF	TGTGCCAGCAGCATATGGGGGGGGGGCTGGAATGAGCAGTTCTTC	1	0.0454545
TRBV27	TRBJ2-6	TRBC2	CASSLAAGLSGANVLTF	TGTGCCAGCAGTTTAGCGGCAGGCCTCTCTGGGGCCAACGTCCTGACTTTC	1	0.0454545
TRBV7-2	TRBJ1-2	TRBC1	CASSLAFSTGVGGNGYTF	TGTGCCAGCAGCTTAGCCTTTTCTACAGGGGTCGGAGGAAATGGCTACACCTTC	1	0.0454545
TRBV7-9	TRBJ2-7	TRBC2	CASSLAGGITYEQYF	TGTGCCAGCAGCTTAGCAGGGGGAATTACCTACGAGCAGTACTTC	1	0.0454545
TRBV7-2	TRBJ2-2	TRBC2	CASSLAGGNTGELFF	TGTGCCAGCAGCTTGGCGGGGGGGAACACCGGGGAGCTGTTTTTT	1	0.0454545
TRBV5-1	TRBJ1-2	TRBC1	CASSLAGSGYTF	TGCGCCAGCAGCTTGGCCGGCAGTGGCTACACCTTC	1	0.0454545
TRBV7-2	TRBJ1-2	TRBC1	CASSLAGTGNGYTF	TGTGCCAGCAGCTTAGCCGGGACAGGGAATGGCTACACCTTC	1	0.0454545
TRBV7-9	TRBJ2-1	TRBC2	CASSLAGTYNEQFF	TGTGCCAGCAGCCTAGCGGGAACCTACAATGAGCAGTTCTTC	1	0.0454545
TRBV7-2	TRBJ1-6	TRBC1	CASSLALGRANSPLHF	TGTGCCAGCAGCTTAGCGTTGGGCAGAGCTAATTCACCCCTCCACTTT	1	0.0454545
TRBV7-2	TRBJ1-1	TRBC1	CASSLALQGSTEAFF	TGTGCCAGCAGCTTAGCGTTACAGGGAAGCACTGAAGCTTTCTTT	1	0.0454545
TRBV7-9	TRBJ2-7	TRBC2	CASSLAVDGSYEQYF	TGTGCCAGCAGCTTGGCCGTTGATGGGTCCTACGAGCAGTACTTC	1	0.0454545
TRBV11-1	TRBJ2-1	TRBC2	CASSLAWGLGDNEQFF	TGTGCCAGCAGCTTAGCGTGGGGACTAGGAGACAATGAGCAGTTCTTC	1	0.0454545
TRBV5-4	TRBJ2-7	TRBC2	CASSLDKQYEQYF	TGTGCCAGCAGCTTGGATAAACAGTACGAGCAGTACTTC	1	0.0454545
TRBV11-2	TRBJ1-2	TRBC1	CASSLDLRVANYGYTF	TGTGCCAGCAGCTTAGATCTCAGGGTCGCTAACTATGGCTACACCTTC	1	0.0454545
TRBV5-4	TRBJ1-2	TRBC1	CASSLDPANYGYTF	TGTGCCAGCAGCTTGGACCCAGCTAACTATGGCTACACCTTC	1	0.0454545
TRBV11-2	TRBJ2-7	TRBC2	CASSLDRRGASNNEQYF	TGTGCCAGCAGCTTAGATCGCAGGGGGGCCTCCAATAACGAGCAGTACTTC	1	0.0454545
TRBV7-6	TRBJ1-1	TRBC1	CASSLDTITEAFF	TGTGCCAGCAGCTTGGATACCATAACAGAAGCTTTCTTT	1	0.0454545
TRBV5-1	TRBJ2-5	TRBC2	CASSLEAGETQYF	TGCGCCAGCAGCTTGGAAGCGGGAGAGACCCAGTACTTC	1	0.0454545
TRBV11-2	TRBJ2-7	TRBC2	CASSLEGGQTYEQYF	TGTGCCAGCAGCCTCGAGGGGGGGCAGACCTACGAGCAGTACTTC	1	0.0454545
TRBV7-6	TRBJ1-2	TRBC1	CASSLEQGVGGYTF	TGTGCCAGCAGCTTAGAACAGGGGGTAGGTGGCTACACCTTC	1	0.0454545
TRBV7-3	TRBJ2-4	TRBC2	CASSLGAGGGNIQYF	TGTGCCAGCAGCTTAGGCGCGGGAGGCGGAAACATTCAGTACTTC	1	0.0454545
TRBV5-4	TRBJ1-1	TRBC1	CASSLGGARGSAEAFF	TGTGCCAGCAGCTTGGGGGGGGCCAGGGGGTCTGCTGAAGCTTTCTTT	1	0.0454545
TRBV28	TRBJ1-4	TRBC1	CASSLGGGEKLFF	TGTGCCAGCAGTTTAGGGGGGGGCGAAAAACTGTTTTTT	1	0.0454545
TRBV27	TRBJ2-7	TRBC2	CASSLGGLAAYEQYF	TGTGCCAGCAGTTTGGGGGGACTAGCGGCCTACGAGCAGTACTTC	1	0.0454545
TRBV7-9	TRBJ2-3	TRBC2	CASSLGGQGGTDTQYF	TGTGCCAGCAGCTTAGGGGGACAGGGTGGCACAGATACGCAGTATTTT	1	0.0454545
TRBV5-1	TRBJ1-1	TRBC1	CASSLGGSLRRTEAFF	TGCGCCAGCAGCTTGGGTGGGTCCCTTAGAAGGACTGAAGCTTTCTTT	1	0.0454545
TRBV5-1	TRBJ1-1	TRBC1	CASSLGILRTEAFF	TGCGCCAGCAGCTTGGGGATCTTGCGGACTGAAGCTTTCTTT	1	0.0454545
TRBV7-2	TRBJ2-1	TRBC2	CASSLGLAGSEQFF	TGTGCCAGCAGCTTAGGCCTAGCGGGATCTGAGCAGTTCTTC	1	0.0454545
TRBV11-2	TRBJ2-5	TRBC2	CASSLGPEGAKGQYF	TGTGCCAGCAGCTTAGGGCCGGAGGGGGCTAAGGGCCAGTACTTC	1	0.0454545
TRBV11-3	TRBJ2-3	TRBC2	CASSLGTSGGADTQYF	TGTGCCAGCAGCTTGGGGACTAGCGGGGGGGCAGATACGCAGTATTTT	1	0.0454545
TRBV7-8	TRBJ2-1	TRBC2	CASSLGTSGRAGEQFF	TGTGCCAGCAGCTTAGGAACTAGCGGGAGGGCCGGTGAGCAGTTCTTC	1	0.0454545
TRBV5-1	TRBJ2-7	TRBC2	CASSLGTSGSSYEQYF	TGCGCCAGCAGCTTGGGGACTAGCGGGAGTTCCTACGAGCAGTACTTC	1	0.0454545
TRBV12-3	TRBJ2-6	TRBC2	CASSLISGANVLTF	TGTGCCAGCAGCCTAATCTCTGGGGCCAACGTCCTGACTTTC	1	0.0454545
TRBV7-3	TRBJ2-1	TRBC2	CASSLKPGPASNYNEQFF	TGTGCCAGCAGCTTAAAGCCGGGGCCGGCCTCGAATTACAATGAGCAGTTCTTC	1	0.0454545
TRBV5-4	TRBJ2-1	TRBC2	CASSLLSGSSYNEQFF	TGTGCCAGCAGCCTTCTAAGCGGGTCGTCCTACAATGAGCAGTTCTTC	1	0.0454545
TRBV6-1	TRBJ2-3	TRBC2	CASSLNLGDTQYF	TGTGCCAGCAGTCTCAACCTAGGAGATACGCAGTATTTT	1	0.0454545
TRBV7-2	TRBJ2-1	TRBC2	CASSLNVASVGYNEQFF	TGTGCCAGCAGTTTAAATGTCGCTAGCGTGGGCTACAATGAGCAGTTCTTC	1	0.0454545
TRBV5-4	TRBJ2-6	TRBC2	CASSLPNTGGVSGANVLTF	TGTGCCAGCAGCTTGCCAAACACGGGAGGAGTCTCTGGGGCCAACGTCCTGACTTTC	1	0.0454545
TRBV28	TRBJ1-2	TRBC1	CASSLQITNYGYTF	TGTGCCAGCAGTTTACAGATAACTAACTATGGCTACACCTTC	1	0.0454545
TRBV6-2	TRBJ2-1	TRBC2	CASSLQRGNYNEQFF	TGTGCCAGCAGCCTCCAGCGGGGGAACTACAATGAGCAGTTCTTC	1	0.0454545
TRBV28	TRBJ2-7	TRBC2	CASSLQRSGGGTYEQYF	TGTGCCAGCAGTTTGCAACGATCCGGTGGGGGAACCTACGAGCAGTACTTC	1	0.0454545
TRBV11-2	TRBJ1-2	TRBC1	CASSLRAGANYGYTF	TGTGCCAGCAGCTTACGCGCAGGAGCTAACTATGGCTACACCTTC	1	0.0454545
TRBV13	TRBJ2-5	TRBC2	CASSLRALAWETQYF	TGTGCCAGCAGCTTAAGAGCACTAGCTTGGGAGACCCAGTACTTC	1	0.0454545
TRBV7-2	TRBJ2-3	TRBC2	CASSLRGLAGGPTQDTQYF	TGTGCCAGCAGCTTAAGGGGACTAGCGGGGGGACCCACACAGGATACGCAGTATTTT	1	0.0454545
TRBV5-5	TRBJ1-6	TRBC1	CASSLRGNTTPGPRSPLHF	TGTGCCAGCAGTCTCCGCGGGAACACAACTCCGGGGCCGAGGTCACCCCTCCACTTT	1	0.0454545
TRBV7-3	TRBJ2-1	TRBC2	CASSLRGTSGGPTSNEQFF	TGTGCCAGCAGCCTCCGGGGGACTAGCGGGGGCCCCACATCCAATGAGCAGTTCTTC	1	0.0454545
TRBV12-4	TRBJ1-2	TRBC1	CASSLSEADTNYGYTF	TGTGCCAGCAGTTTAAGTGAGGCAGACACTAACTATGGCTACACCTTC	1	0.0454545
TRBV27	TRBJ1-3	TRBC1	CASSLSGNLITSGNTIYF	TGTGCCAGCAGTTTATCAGGGAACCTAATAACCTCTGGAAACACCATATATTTT	1	0.0454545
TRBV5-1	TRBJ1-3	TRBC1	CASSLSGNSGNTIYF	TGCGCCAGCAGCTTGTCCGGGAACTCTGGAAACACCATATATTTT	1	0.0454545
TRBV7-3	TRBJ2-3	TRBC2	CASSLSKLTDTQYF	TGTGCCAGCAGCTTAAGCAAGCTCACAGATACGCAGTATTTT	1	0.0454545
TRBV5-4	TRBJ2-2	TRBC2	CASSLSRGNTGELFF	TGTGCCAGCAGCTTGTCCAGGGGGAACACCGGGGAGCTGTTTTTT	1	0.0454545
TRBV5-5	TRBJ1-6	TRBC1	CASSLSRSLSYNSPLHF	TGTGCCAGCAGCCTGAGTAGGTCGCTCTCCTATAATTCACCCCTCCACTTT	1	0.0454545
TRBV7-9	TRBJ2-1	TRBC2	CASSLSSGTGGSSYNEQFF	TGTGCCAGCAGCTTATCCTCCGGGACAGGGGGAAGCTCCTACAATGAGCAGTTCTTC	1	0.0454545
TRBV5-1	TRBJ2-1	TRBC2	CASSLSTWVGGTYNEQFF	TGCGCCAGCAGCTTGTCAACATGGGTTGGGGGGACCTACAATGAGCAGTTCTTC	1	0.0454545
TRBV7-2	TRBJ2-7	TRBC2	CASSLSYRDYEQYF	TGTGCCAGCAGCTTATCCTACAGAGATTACGAGCAGTACTTC	1	0.0454545
TRBV5-4	TRBJ2-7	TRBC2	CASSLTGDYEQYF	TGTGCCAGCAGCTTAACAGGTGACTACGAGCAGTACTTC	1	0.0454545
TRBV28	TRBJ1-2	TRBC1	CASSLTGEGLSYTF	TGTGCCAGCAGTTTAACAGGGGAGGGATTAAGCTACACCTTC	1	0.0454545
TRBV7-3	TRBJ2-2	TRBC2	CASSLTGGAGTAGELFF	TGTGCCAGCAGCTTAACCGGGGGGGCCGGTACCGCCGGGGAGCTGTTTTTT	1	0.0454545
TRBV7-2	TRBJ1-2	TRBC1	CASSLTGYANYGYTF	TGTGCCAGCAGCCTAACAGGATATGCTAACTATGGCTACACCTTC	1	0.0454545
TRBV7-3	TRBJ1-1	TRBC1	CASSLTLNTEAFF	TGTGCCAGCAGCTTAACCCTGAACACTGAAGCTTTCTTT	1	0.0454545
TRBV7-2	TRBJ2-7	TRBC2	CASSLTPGLGHEQYF	TGTGCCAGCAGCTTAACACCGGGACTAGGGCACGAGCAGTACTTC	1	0.0454545
TRBV7-3	TRBJ2-7	TRBC2	CASSLVGGGYEQYF	TGTGCCAGCAGCTTAGTTGGAGGGGGCTACGAGCAGTACTTC	1	0.0454545
TRBV7-8	TRBJ1-5		CASSLVGGTLRQPQHF	TGTGCCAGCAGCTTAGTCGGGGGTACTCTCCGTCAGCCCCAGCATTTT	1	0.0454545
TRBV11-2	TRBJ1-4	TRBC1	CASSLVGGVNEKLFF	TGTGCCAGCAGCTTAGTAGGGGGCGTAAATGAAAAACTGTTTTTT	1	0.0454545
TRBV28	TRBJ1-4	TRBC1	CASSLVGPLEEKLFF	TGTGCCAGCAGTTTAGTCGGTCCGCTGGAGGAAAAACTGTTTTTT	1	0.0454545
TRBV7-2	TRBJ2-7	TRBC2	CASSLVGTGGYEQYF	TGTGCCAGCAGCTTAGTGGGGACAGGGGGCTACGAGCAGTACTTC	1	0.0454545
TRBV5-6	TRBJ1-1	TRBC1	CASSLVKAEAFF	TGTGCCAGCAGCTTGGTAAAGGCTGAAGCTTTCTTT	1	0.0454545
TRBV12-4	TRBJ2-7	TRBC2	CASSLVPPGQGASEQYF	TGTGCCAGCAGTTTAGTCCCTCCGGGACAGGGGGCTTCCGAGCAGTACTTC	1	0.0454545
TRBV5-1	TRBJ2-3	TRBC2	CASSLVRAAGGLSQLTDTQYF	TGCGCCAGCAGCTTGGTAAGAGCAGCGGGAGGGCTGAGTCAACTGACAGATACGCAGTATTTT	1	0.0454545
TRBV7-6	TRBJ2-7	TRBC2	CASSLVSSGSLLSEQYF	TGTGCCAGCAGCTTAGTTTCTAGCGGGAGCCTCCTAAGCGAGCAGTACTTC	1	0.0454545
TRBV5-1	TRBJ2-7	TRBC2	CASSLVTQGGFLYEQYF	TGCGCCAGCAGCTTGGTCACGCAGGGGGGATTCCTCTACGAGCAGTACTTC	1	0.0454545
TRBV7-2	TRBJ1-2	TRBC1	CASSLVVGQSHGYTF	TGTGCCAGCAGCTTAGTCGTGGGACAGTCTCATGGCTACACCTTC	1	0.0454545
TRBV27	TRBJ2-1	TRBC2	CASSLYQTDYNEQFF	TGTGCCAGCAGTTTATACCAGACAGATTACAATGAGCAGTTCTTC	1	0.0454545
TRBV19	TRBJ2-1	TRBC2	CASSMTSGSYGEQFF	TGTGCCAGTAGTATGACTAGCGGGAGTTATGGTGAGCAGTTCTTC	1	0.0454545
TRBV5-1	TRBJ1-1	TRBC1	CASSNGQVGTEAFF	TGCGCCAGCAGCAACGGACAAGTGGGCACTGAAGCTTTCTTT	1	0.0454545
TRBV6-5	TRBJ1-6	TRBC1	CASSNQQGASPLHF	TGTGCCAGCAGCAACCAACAGGGTGCTTCACCCCTCCACTTT	1	0.0454545
TRBV5-1	TRBJ2-7	TRBC2	CASSPDGSGTSYEQYF	TGCGCCAGCAGTCCGGATGGTAGCGGGACCTCCTACGAGCAGTACTTC	1	0.0454545
TRBV7-2	TRBJ1-2	TRBC1	CASSPDNNYGYTF	TGTGCCAGCAGCCCGGACAATAACTATGGCTACACCTTC	1	0.0454545
TRBV11-3	TRBJ2-6	TRBC2	CASSPDRGSGANVLTF	TGTGCCAGCAGCCCTGACAGGGGGTCGGGGGCCAACGTCCTGACTTTC	1	0.0454545
TRBV7-6	TRBJ2-1	TRBC2	CASSPGAVNEQFF	TGTGCCAGCAGCCCGGGGGCGGTCAATGAGCAGTTCTTC	1	0.0454545
TRBV9	TRBJ2-1	TRBC2	CASSPGGGLNNEQFF	TGTGCCAGCAGCCCAGGGGGGGGGCTCAACAATGAGCAGTTCTTC	1	0.0454545
TRBV5-1	TRBJ2-1	TRBC2	CASSPGLAGGIHNEQFF	TGCGCCAGCAGCCCTGGACTAGCGGGGGGCATACACAATGAGCAGTTCTTC	1	0.0454545
TRBV11-1	TRBJ2-3	TRBC2	CASSPGLAGGKTQYF	TGTGCCAGCAGCCCGGGACTAGCGGGGGGAAAGACGCAGTATTTT	1	0.0454545
TRBV5-1	TRBJ2-5	TRBC2	CASSPGLAGSQETQYF	TGCGCCAGCAGCCCCGGACTAGCGGGTAGCCAAGAGACCCAGTACTTC	1	0.0454545
TRBV5-1	TRBJ1-3	TRBC1	CASSPGQANTIYF	TGCGCCAGCAGCCCCGGACAGGCAAACACCATATATTTT	1	0.0454545
TRBV7-6	TRBJ2-7	TRBC2	CASSPGTELYEQYF	TGTGCCAGCAGCCCCGGGACAGAGCTCTACGAGCAGTACTTC	1	0.0454545
TRBV27	TRBJ2-1	TRBC2	CASSPGTSGSAYNEQFF	TGTGCCAGCAGCCCCGGGACTAGCGGGTCCGCCTACAATGAGCAGTTCTTC	1	0.0454545
TRBV11-1	TRBJ1-1	TRBC1	CASSPHTEAFF	TGTGCCAGCAGTCCCCACACTGAAGCTTTCTTT	1	0.0454545
TRBV9	TRBJ2-2	TRBC2	CASSPIPGRGPSTGELFF	TGTGCCAGCAGCCCGATCCCCGGACGGGGCCCGAGCACCGGGGAGCTGTTTTTT	1	0.0454545
TRBV28	TRBJ1-5	TRBC1	CASSPIRYPGNQPQHF	TGTGCCAGCAGTCCTATCCGATACCCGGGCAATCAGCCCCAGCATTTT	1	0.0454545
TRBV18	TRBJ1-2	TRBC1	CASSPLEGANDYAYTF	TGTGCCAGCTCACCACTCGAGGGTGCTAACGACTATGCCTACACCTTC	1	0.0454545
TRBV6-5	TRBJ1-5	TRBC1	CASSPNRGRNQPQHF	TGTGCCAGCAGTCCCAACAGGGGACGCAATCAGCCCCAGCATTTT	1	0.0454545
TRBV5-6	TRBJ1-2	TRBC1	CASSPPGSSSNYGYTF	TGTGCCAGCAGCCCTCCGGGAAGTTCTTCTAACTATGGCTACACCTTC	1	0.0454545
TRBV5-4	TRBJ2-1	TRBC2	CASSPPPGGYNEQFF	TGTGCCAGCAGCCCTCCCCCGGGAGGTTACAATGAGCAGTTCTTC	1	0.0454545
TRBV12-3	TRBJ1-1	TRBC1	CASSPPPLNTEAFF	TGTGCCAGCAGTCCCCCCCCCTTGAACACTGAAGCTTTCTTT	1	0.0454545
TRBV4-2	TRBJ2-7	TRBC2	CASSPQAVSYEQYF	TGTGCCAGCAGCCCACAGGCTGTATCCTACGAGCAGTACTTC	1	0.0454545
TRBV7-2	TRBJ2-3	TRBC2	CASSPQPGLITDTQYF	TGTGCCAGCAGCCCCCAACCGGGACTTATTACAGATACGCAGTATTTT	1	0.0454545
TRBV7-9	TRBJ2-1	TRBC2	CASSPREDRNNEQFF	TGTGCCAGCAGCCCCCGCGAGGACAGAAACAATGAGCAGTTCTTC	1	0.0454545
TRBV6-5	TRBJ1-2	TRBC1	CASSPRPTNLYGYTF	TGTGCCAGCAGTCCCCGGCCAACCAACCTCTATGGCTACACCTTC	1	0.0454545
TRBV5-5	TRBJ2-5	TRBC2	CASSPRREETQYF	TGTGCCAGCAGCCCCCGCAGGGAGGAGACCCAGTACTTC	1	0.0454545
TRBV7-8	TRBJ2-5	TRBC2	CASSPRRVGGEETQYF	TGTGCCAGCAGCCCCCGTCGGGTCGGGGGGGAAGAGACCCAGTACTTC	1	0.0454545
TRBV19	TRBJ2-2	TRBC2	CASSPRTGNTGELFF	TGTGCCAGTAGTCCTCGGACAGGGAACACCGGGGAGCTGTTTTTT	1	0.0454545
TRBV5-1	TRBJ2-2	TRBC2	CASSPRTGYTGELFF	TGCGCCAGCAGCCCGAGGACTGGTTACACCGGGGAGCTGTTTTTT	1	0.0454545
TRBV5-6	TRBJ2-5	TRBC2	CASSPTGLPQETQYF	TGTGCCAGCAGCCCGACAGGGTTGCCCCAAGAGACCCAGTACTTC	1	0.0454545
TRBV7-2	TRBJ1-2	TRBC1	CASSPTGTGGWGYTF	TGTGCCAGCAGCCCGACCGGGACAGGGGGGTGGGGCTACACCTTC	1	0.0454545
TRBV5-5	TRBJ2-1	TRBC2	CASSPTINEQFF	TGTGCCAGCAGCCCGACTATCAATGAGCAGTTCTTC	1	0.0454545
TRBV9	TRBJ1-1	TRBC1	CASSPTKGQVVFYTEAFF	TGTGCCAGCAGCCCGACAAAAGGACAGGTCGTCTTTTACACTGAAGCTTTCTTT	1	0.0454545
TRBV5-1	TRBJ1-2	TRBC1	CASSPVEGPKGGYTF	TGCGCCAGCAGCCCCGTAGAGGGGCCCAAGGGTGGCTACACCTTC	1	0.0454545
TRBV7-2	TRBJ2-7	TRBC2	CASSPWYYSYEQYF	TGTGCCAGCAGCCCTTGGTACTATTCCTACGAGCAGTACTTC	1	0.0454545
TRBV3-1	TRBJ1-6	TRBC1	CASSQAGANSPLHF	TGTGCCAGCAGCCAAGCCGGGGCAAATTCACCCCTCCACTTT	1	0.0454545
TRBV3-1	TRBJ1-1	TRBC1	CASSQAGGNTEAFF	TGTGCCAGCAGCCAAGCTGGGGGGAACACTGAAGCTTTCTTT	1	0.0454545
TRBV14	TRBJ2-7	TRBC2	CASSQDGGTVIYEQYF	TGTGCCAGCAGCCAAGATGGGGGGACAGTGATCTACGAGCAGTACTTC	1	0.0454545
TRBV3-1	TRBJ2-7	TRBC2	CASSQDHGGFYEQYF	TGTGCCAGCAGCCAAGATCACGGGGGATTCTACGAGCAGTACTTC	1	0.0454545
TRBV4-2	TRBJ2-7	TRBC2	CASSQDIGSPYEQYF	TGTGCCAGCAGCCAAGATATCGGTTCGCCCTACGAGCAGTACTTC	1	0.0454545
TRBV14	TRBJ1-1	TRBC1	CASSQDLGTGGLLNTEAFF	TGTGCCAGCAGCCAAGATTTGGGGACAGGGGGCCTCCTGAACACTGAAGCTTTCTTT	1	0.0454545
TRBV4-3	TRBJ1-6	TRBC1	CASSQDPSDESYNSPLHF	TGCGCCAGCAGCCAAGACCCTTCCGACGAGTCCTATAATTCACCCCTCCACTTT	1	0.0454545
TRBV6-5	TRBJ2-1	TRBC2	CASSQDSSEQFF	TGTGCCAGCAGTCAGGACAGCTCTGAGCAGTTCTTC	1	0.0454545
TRBV3-1	TRBJ2-3	TRBC2	CASSQEGSTDTQYF	TGTGCCAGCAGCCAAGAAGGTAGCACAGATACGCAGTATTTT	1	0.0454545
TRBV4-1	TRBJ2-1	TRBC2	CASSQERLAGAPSSYNEQFF	TGCGCCAGCAGCCAAGAGAGACTAGCGGGGGCTCCGAGCTCCTACAATGAGCAGTTCTTC	1	0.0454545
TRBV4-1	TRBJ2-5	TRBC2	CASSQERRCQETQYF	TGCGCCAGCAGCCAAGAGAGGCGGTGCCAAGAGACCCAGTACTTC	1	0.0454545
TRBV3-1	TRBJ1-2	TRBC1	CASSQGDLGSEGYTF	TGTGCCAGCAGCCAGGGGGACCTCGGGTCGGAGGGCTACACCTTC	1	0.0454545
TRBV4-1	TRBJ2-5	TRBC2	CASSQGFPVLAYAIIGYGETQYF	TGCGCCAGCAGCCAAGGGTTCCCCGTCCTAGCATACGCTATCATCGGGTATGGGGAGACCCAGTACTTC	1	0.0454545
TRBV18	TRBJ1-1	TRBC1	CASSQGLNTEAFF	TGTGCCAGCTCACAGGGGTTGAACACTGAAGCTTTCTTT	1	0.0454545
TRBV5-4	TRBJ2-7	TRBC2	CASSQGQGESYEQYF	TGTGCCAGCAGCCAAGGACAGGGCGAATCCTACGAGCAGTACTTC	1	0.0454545
TRBV18	TRBJ2-5	TRBC2	CASSQHQETQYF	TGTGCCAGCTCACAGCACCAAGAGACCCAGTACTTC	1	0.0454545
TRBV3-1	TRBJ1-1	TRBC1	CASSQKGGGGTEAFF	TGTGCCAGCAGCCAAAAAGGCGGGGGGGGCACTGAAGCTTTCTTT	1	0.0454545
TRBV6-5	TRBJ2-7	TRBC2	CASSQPRGLADEQYF	TGTGCCAGCAGCCAACCCCGGGGGCTAGCGGACGAGCAGTACTTC	1	0.0454545
TRBV3-1	TRBJ2-7	TRBC2	CASSQVAGTSGSYEQYF	TGTGCCAGCAGCCAAGTCGCCGGGACTAGCGGCTCCTACGAGCAGTACTTC	1	0.0454545
TRBV6-6	TRBJ2-2	TRBC2	CASSQYGELTNTGELFF	TGTGCCAGCAGTCAATACGGGGAACTTACGAACACCGGGGAGCTGTTTTTT	1	0.0454545
TRBV5-1	TRBJ2-5	TRBC2	CASSRDQQETQYF	TGCGCCAGCAGCCGGGACCAGCAAGAGACCCAGTACTTC	1	0.0454545
TRBV6-2	TRBJ2-2	TRBC2	CASSRDRGRTGELFF	TGTGCCAGCAGCCGGGACAGGGGGCGAACCGGGGAGCTGTTTTTT	1	0.0454545
TRBV14	TRBJ2-7	TRBC2	CASSRGGARSYEQYF	TGTGCCAGCAGCCGTGGGGGGGCCCGCTCCTACGAGCAGTACTTC	1	0.0454545
TRBV7-2	TRBJ2-5	TRBC2	CASSRGGGDNQETQYF	TGTGCCAGCAGCCGAGGGGGGGGGGACAACCAAGAGACCCAGTACTTC	1	0.0454545
TRBV5-1	TRBJ2-7	TRBC2	CASSRGWQGAGEQYF	TGCGCCAGCAGCCGCGGGTGGCAGGGGGCCGGCGAGCAGTACTTC	1	0.0454545
TRBV6-6	TRBJ1-1	TRBC1	CASSRGWTEAFF	TGTGCCAGCAGTCGCGGCTGGACTGAAGCTTTCTTT	1	0.0454545
TRBV18	TRBJ2-2	TRBC2	CASSRLEGNSRPNTGELFF	TGTGCCAGCTCTCGCCTCGAGGGAAACTCTAGGCCGAACACCGGGGAGCTGTTTTTT	1	0.0454545
TRBV7-2	TRBJ1-1	TRBC1	CASSRPKQGTRVEAFF	TGTGCCAGCAGTCGACCTAAACAAGGGACGAGGGTAGAAGCTTTCTTT	1	0.0454545
TRBV7-9	TRBJ1-2	TRBC1	CASSRRGF	TGTGCCAGCAGCCGCAGGGGATTC	1	0.0454545
TRBV6-2	TRBJ2-1	TRBC2	CASSRSDRDRRSGEQFF	TGTGCCAGCAGCCGATCCGACCGGGACAGACGATCAGGTGAGCAGTTCTTC	1	0.0454545
TRBV6-2	TRBJ2-1	TRBC2	CASSRSNEQFF	TGTGCCAGCAGCAGGAGCAATGAGCAGTTCTTC	1	0.0454545
TRBV4-1	TRBJ2-3	TRBC2	CASSRTDGGTDTQYF	TGCGCCAGCAGCCGGACGGATGGGGGTACAGATACGCAGTATTTT	1	0.0454545
TRBV5-1	TRBJ1-2	TRBC1	CASSSDTRGYGYTF	TGCGCCAGCAGCTCGGACACAAGGGGCTATGGCTACACCTTC	1	0.0454545
TRBV9	TRBJ2-1	TRBC2	CASSSEREGYNEQFF	TGTGCCAGCAGCTCCGAGCGGGAGGGGTACAATGAGCAGTTCTTC	1	0.0454545
TRBV5-6	TRBJ1-5	TRBC1	CASSSFGIQPQHF	TGTGCCAGCAGCTCATTCGGAATTCAGCCCCAGCATTTT	1	0.0454545
TRBV6-2	TRBJ2-3	TRBC2	CASSSGENLDTQYF	TGTGCCAGCAGTAGCGGGGAGAATTTGGATACGCAGTATTTT	1	0.0454545
TRBV7-9	TRBJ1-1	TRBC1	CASSSGGIEAFF	TGTGCCAGCAGCTCTGGAGGGATTGAAGCTTTCTTT	1	0.0454545
TRBV5-1	TRBJ1-1	TRBC1	CASSSGLTLDRGENTEAFF	TGCGCCAGCAGCTCTGGCTTGACTTTGGACAGGGGTGAGAACACTGAAGCTTTCTTT	1	0.0454545
TRBV5-1	TRBJ2-6	TRBC2	CASSSGSGARSGANVLTF	TGCGCCAGCAGCTCGGGGTCGGGGGCGCGATCTGGGGCCAACGTCCTGACTTTC	1	0.0454545
TRBV6-5	TRBJ2-5	TRBC2	CASSSGSWSLETQYF	TGTGCCAGCTCTAGCGGGAGCTGGTCCTTAGAGACCCAGTACTTC	1	0.0454545
TRBV6-5	TRBJ1-2	TRBC1	CASSSHTGNFYGYTF	TGTGCCAGCAGTTCCCATACAGGAAATTTCTATGGCTACACCTTC	1	0.0454545
TRBV18	TRBJ1-2	TRBC1	CASSSNQGSYGYTF	TGTGCCAGTAGTTCAAACCAGGGAAGCTATGGCTACACCTTC	1	0.0454545
TRBV7-8	TRBJ2-3	TRBC2	CASSSPDTQYF	TGTGCCAGCAGCTCCCCAGATACGCAGTATTTT	1	0.0454545
TRBV7-3	TRBJ2-1	TRBC2	CASSSPGLREQFF	TGTGCCAGCAGCTCCCCGGGACTCCGAGAGCAGTTCTTC	1	0.0454545
TRBV9	TRBJ1-4	TRBC1	CASSSPGPLGEKLFF	TGTGCCAGCAGCTCGCCGGGACCCCTAGGTGAAAAACTGTTTTTT	1	0.0454545
TRBV4-3	TRBJ2-3	TRBC2	CASSSPRRTDTQYF	TGCGCCAGCAGCTCCCCCCGGCGCACAGATACGCAGTATTTT	1	0.0454545
TRBV13	TRBJ1-2	TRBC1	CASSSQDRTAGYTF	TGTGCCAGCAGCTCCCAAGACAGGACCGCTGGCTACACCTTC	1	0.0454545
TRBV7-6	TRBJ2-5	TRBC2	CASSSRGNGETQYF	TGTGCCAGCAGCTCACGGGGGAATGGAGAGACCCAGTACTTC	1	0.0454545
TRBV5-1	TRBJ2-1	TRBC2	CASSSSPASDYNEQFF	TGCGCCAGCAGCTCATCACCTGCTAGCGACTACAATGAGCAGTTCTTC	1	0.0454545
TRBV7-9	TRBJ1-1	TRBC1	CASSSTANTEAFF	TGTGCCAGCAGCTCGACAGCGAACACTGAAGCTTTCTTT	1	0.0454545
TRBV6-5	TRBJ2-7	TRBC2	CASSSTFTGSYEQYF	TGTGCCAGCAGCTCCACTTTTACCGGCTCCTACGAGCAGTACTTC	1	0.0454545
TRBV28	TRBJ1-4	TRBC1	CASSSTGSTNEKLFF	TGTGCCAGCAGTTCCACAGGGTCAACTAATGAAAAACTGTTTTTT	1	0.0454545
TRBV6-5	TRBJ1-2	TRBC1	CASSSYTNGYTF	TGTGCCAGCAGTTCTTACACCAATGGCTACACCTTC	1	0.0454545
TRBV12-4	TRBJ2-2	TRBC2	CASSTGAGELFF	TGTGCCAGCAGTACAGGGGCCGGGGAGCTGTTTTTT	1	0.0454545
TRBV6-1	TRBJ1-6	TRBC1	CASSTGLKIQYNSPLHF	TGTGCCAGCAGTACCGGACTGAAAATCCAGTATAATTCACCCCTCCACTTT	1	0.0454545
TRBV19	TRBJ2-5	TRBC2	CASSTSGTELKRTQYF	TGTGCCAGTAGTACAAGCGGGACAGAATTAAAGAGAACCCAGTACTTC	1	0.0454545
TRBV6-5	TRBJ2-1	TRBC2	CASSTTGGAFGEQFF	TGTGCCAGCAGTACAACGGGGGGAGCATTTGGCGAGCAGTTCTTC	1	0.0454545
TRBV9	TRBJ2-7	TRBC2	CASSVAEGAVYEQYF	TGTGCCAGCAGCGTTGCCGAGGGGGCGGTTTACGAGCAGTACTTC	1	0.0454545
TRBV9	TRBJ2-2	TRBC2	CASSVDKWGELFF	TGTGCCAGCAGCGTAGATAAATGGGGGGAGCTGTTTTTT	1	0.0454545
TRBV9	TRBJ2-1	TRBC2	CASSVEDSSYNEQFF	TGTGCCAGCAGCGTAGAGGACAGCTCCTACAATGAGCAGTTCTTC	1	0.0454545
TRBV9	TRBJ1-2	TRBC1	CASSVEGRSYGYTF	TGTGCCAGCAGCGTAGAAGGCAGGAGCTATGGCTACACCTTC	1	0.0454545
TRBV27	TRBJ1-1	TRBC1	CASSVPGQGATEAFF	TGTGCCAGCAGTGTACCGGGACAGGGGGCGACTGAAGCTTTCTTT	1	0.0454545
TRBV9	TRBJ1-2	TRBC1	CASSVRGRGGGYTF	TGTGCCAGCAGCGTAAGGGGGCGCGGAGGCGGCTACACCTTC	1	0.0454545
TRBV7-9	TRBJ2-1	TRBC2	CASSVRQGGYNEQFF	TGTGCCAGCAGCGTTCGACAGGGGGGGTACAATGAGCAGTTCTTC	1	0.0454545
TRBV9	TRBJ1-4	TRBC1	CASSVRSGSNEKLFF	TGTGCCAGCAGCGTTCGATCAGGGAGTAATGAAAAACTGTTTTTT	1	0.0454545
TRBV9	TRBJ2-7	TRBC2	CASSVTGGESEQYF	TGTGCCAGCAGCGTAACGGGGGGGGAATCCGAGCAGTACTTC	1	0.0454545
TRBV9	TRBJ2-5	TRBC2	CASSVVAGDALETQYF	TGTGCCAGCAGCGTAGTCGCGGGAGATGCTTTGGAGACCCAGTACTTC	1	0.0454545
TRBV7-9	TRBJ1-5	TRBC1	CASSWTGRNQPQHF	TGTGCCAGCAGTTGGACAGGCCGCAATCAGCCCCAGCATTTT	1	0.0454545
TRBV6-6	TRBJ1-2	TRBC1	CASSYAEKLNGYTF	TGTGCCAGCAGTTACGCTGAAAAGCTGAATGGCTACACCTTC	1	0.0454545
TRBV6-6	TRBJ1-6	TRBC1	CASSYFRVENNSPLHF	TGTGCCAGCAGTTACTTCAGGGTAGAAAATAATTCACCCCTCCACTTT	1	0.0454545
TRBV6-5	TRBJ2-7	TRBC2	CASSYGRDYEQYF	TGTGCCAGCAGCTACGGGCGGGACTACGAGCAGTACTTC	1	0.0454545
TRBV6-5	TRBJ1-2	TRBC1	CASSYLDRGSGYTF	TGTGCCAGCAGTTACTTGGACAGGGGGTCTGGCTACACCTTC	1	0.0454545
TRBV6-2	TRBJ2-1	TRBC2	CASSYPLREQFF	TGTGCCAGCAGTTACCCACTACGTGAGCAGTTCTTC	1	0.0454545
TRBV6-2	TRBJ2-7	TRBC2	CASSYPLTADYEQYF	TGTGCCAGCAGTTACCCCTTGACAGCTGACTACGAGCAGTACTTC	1	0.0454545
TRBV6-2	TRBJ1-5	TRBC1	CASSYRGGQGLNQPQHF	TGTGCCAGCAGTTACCGCGGGGGACAGGGGCTGAATCAGCCCCAGCATTTT	1	0.0454545
TRBV6-2	TRBJ1-1	TRBC1	CASSYRPRGAFF	TGTGCCAGCAGTTACCGGCCTAGGGGGGCTTTCTTT	1	0.0454545
TRBV6-5	TRBJ1-1	TRBC1	CASSYRQGGTEAFF	TGTGCCAGCAGTTACAGGCAGGGGGGGACTGAAGCTTTCTTT	1	0.0454545
TRBV6-2	TRBJ1-2	TRBC1	CASSYSPDGTFNYGYTF	TGTGCCAGCAGTTATTCTCCCGACGGGACTTTCAACTATGGCTACACCTTC	1	0.0454545
TRBV6-2	TRBJ2-1	TRBC2	CASSYSPGTGGEDEQFF	TGTGCCAGCAGTTACTCGCCCGGGACAGGGGGCGAGGATGAGCAGTTCTTC	1	0.0454545
TRBV6-6	TRBJ1-3	TRBC1	CASSYSRQGRSGNTIYF	TGTGCCAGCAGTTACTCCAGACAGGGGCGCTCTGGAAACACCATATATTTT	1	0.0454545
TRBV6-2	TRBJ2-1	TRBC2	CASSYSSSYNEQFF	TGTGCCAGCAGTTACTCGTCCTCATACAATGAGCAGTTCTTC	1	0.0454545
TRBV5-1	TRBJ1-1	TRBC1	CASSYSTFKNTEAFF	TGCGCCAGCAGCTATTCAACTTTCAAGAACACTGAAGCTTTCTTT	1	0.0454545
TRBV6-2	TRBJ2-2	TRBC2	CASSYSVSGANTGELFF	TGTGCCAGCAGTTACAGTGTGAGCGGTGCGAACACCGGGGAGCTGTTTTTT	1	0.0454545
TRBV12-3	TRBJ1-1	TRBC1	CASSYTGDGAEAFF	TGTGCCAGCAGCTATACAGGGGATGGGGCTGAAGCTTTCTTT	1	0.0454545
TRBV6-2	TRBJ2-7	TRBC2	CASSYTGTYEQYF	TGTGCCAGCAGTTACACAGGTACCTACGAGCAGTACTTC	1	0.0454545
TRBV19	TRBJ1-2	TRBC1	CASTANRDRETGYTF	TGTGCCAGTACCGCAAACCGGGACAGGGAAACTGGCTACACCTTC	1	0.0454545
TRBV3-1	TRBJ1-3	TRBC1	CASTDISGNTIYF	TGTGCCAGCACGGACATAAGTGGAAACACCATATATTTT	1	0.0454545
TRBV6-6	TRBJ2-7	TRBC2	CASTDRLAAYEQYF	TGTGCCAGCACCGACAGGCTAGCGGCCTACGAGCAGTACTTC	1	0.0454545
TRBV2	TRBJ1-5	TRBC1	CASTGVNQPQHF	TGTGCCAGCACGGGGGTAAATCAGCCCCAGCATTTT	1	0.0454545
TRBV12-4	TRBJ1-2	TRBC1	CASTISPLGYGYTF	TGTGCCAGCACCATCAGTCCTTTGGGGTATGGCTACACCTTC	1	0.0454545
TRBV2	TRBJ2-7	TRBC2	CASTNTAWEQYF	TGTGCCAGCACAAATACCGCATGGGAGCAGTACTTC	1	0.0454545
TRBV13	TRBJ1-2	TRBC1	CASTPGTDYYGYTF	TGTGCCAGCACCCCCGGGACGGATTACTATGGCTACACCTTC	1	0.0454545
TRBV6-6	TRBJ2-1	TRBC2	CASTPGVSNEQFF	TGTGCCAGCACCCCAGGGGTCTCCAATGAGCAGTTCTTC	1	0.0454545
TRBV9	TRBJ1-1	TRBC1	CASTPRGEGTEAFF	TGTGCCAGCACTCCTCGGGGTGAAGGGACTGAAGCTTTCTTT	1	0.0454545
TRBV6-2	TRBJ2-1	TRBC2	CASTQRRGGDEQFF	TGTGCCAGCACCCAGAGGCGGGGGGGCGATGAGCAGTTCTTC	1	0.0454545
TRBV24-1	TRBJ2-3	TRBC2	CATSDLEKRISTDTQYF	TGTGCCACCAGTGATTTGGAGAAGCGGATCAGCACAGATACGCAGTATTTT	1	0.0454545
TRBV24-1	TRBJ2-1	TRBC2	CATSDSAGNEQFF	TGTGCCACCAGTGATTCTGCAGGGAATGAGCAGTTCTTC	1	0.0454545
TRBV24-1	TRBJ1-2	TRBC1	CATSEPPGQGADGYTF	TGTGCCACCAGTGAGCCCCCGGGACAGGGGGCGGATGGCTACACCTTC	1	0.0454545
TRBV15	TRBJ2-2	TRBC2	CATSEWDSSFGELFF	TGTGCCACCAGCGAGTGGGATTCGTCATTCGGGGAGCTGTTTTTT	1	0.0454545
TRBV15	TRBJ2-1	TRBC2	CATSRDRLAGLTNEQFF	TGTGCCACCAGCAGAGATAGGCTAGCGGGGCTTACCAATGAGCAGTTCTTC	1	0.0454545
TRBV15	TRBJ1-1	TRBC1	CATSRDRMEGNTEAFF	TGTGCCACCAGCAGAGATAGAATGGAGGGGAACACTGAAGCTTTCTTT	1	0.0454545
TRBV15	TRBJ2-3	TRBC2	CATSRKIRGSGTADTQYF	TGTGCCACCAGCAGAAAAATCCGGGGTAGCGGGACTGCAGATACGCAGTATTTT	1	0.0454545
TRBV7-9	TRBJ1-3	TRBC1	CAVRTKPRSANVSTIYF	TGTGCCGTACGAACAAAACCCCGGTCAGCCAACGTGAGCACCATATATTTT	1	0.0454545
TRBV6-1	TRBJ2-7	TRBC2	CAVRWGPYSYEQYF	TGTGCCGTTCGATGGGGACCCTACTCCTACGAGCAGTACTTC	1	0.0454545
TRBV30	TRBJ2-1	TRBC2	CAWGVWVYGEQFF	TGTGCCTGGGGCGTCTGGGTTTATGGTGAGCAGTTCTTC	1	0.0454545
TRBV30	TRBJ2-4	TRBC2	CAWQNRGGQGNIQYF	TGTGCCTGGCAAAACCGAGGGGGACAGGGAAACATTCAGTACTTC	1	0.0454545
TRBV30	TRBJ2-5	TRBC2	CAWRGTGGVETQYF	TGTGCCTGGAGGGGGACAGGGGGCGTCGAGACCCAGTACTTC	1	0.0454545
TRBV30	TRBJ2-7	TRBC2	CAWRSANSYEQYF	TGTGCCTGGAGGTCAGCAAACTCCTACGAGCAGTACTTC	1	0.0454545
TRBV30	TRBJ1-1	TRBC1	CAWSLDRTEAFF	TGTGCCTGGAGTCTCGACAGGACTGAAGCTTTCTTT	1	0.0454545
TRBV30	TRBJ2-1	TRBC2	CAWSLLGQVAGVYEQFF	TGTGCCTGGAGTCTACTGGGGCAGGTAGCGGGAGTATATGAGCAGTTCTTC	1	0.0454545
TRBV30	TRBJ2-1	TRBC2	CAWSVGGSFSYNEQFF	TGTGCCTGGAGTGTAGGTGGTTCCTTCTCCTACAATGAGCAGTTCTTC	1	0.0454545
TRBV30	TRBJ2-1	TRBC2	CAWSVLSGAYNEQFF	TGTGCCTGGAGTGTACTAAGCGGGGCTTACAATGAGCAGTTCTTC	1	0.0454545
TRBV30	TRBJ1-6	TRBC1	CAWSVRQGPPNSPLHF	TGTGCCTGGAGTGTACGACAGGGCCCCCCCAATTCACCCCTCCACTTT	1	0.0454545
TRBV30	TRBJ1-2	TRBC1	CAWTGAGVVGGYTF	TGTGCCTGGACTGGGGCAGGGGTAGTTGGTGGCTACACCTTC	1	0.0454545
TRBV2	TRBJ2-7	TRBC2	CGRQGAYEQYF	TGTGGCAGACAGGGGGCGTACGAGCAGTACTTC	1	0.0454545
TRBV20-1	TRBJ2-3	TRBC2	CSAGLAGGGTDTQYF	TGCAGTGCGGGACTAGCGGGAGGCGGCACAGATACGCAGTATTTT	1	0.0454545
TRBV20-1	TRBJ1-2	TRBC1	CSAIPPGFYYGYTF	TGCAGTGCTATCCCACCGGGTTTTTACTATGGCTACACCTTC	1	0.0454545
TRBV20-1	TRBJ2-4	TRBC2	CSAKRDSSLSSAQYF	TGCAGTGCTAAACGAGACAGTAGCCTTTCATCCGCCCAGTACTTC	1	0.0454545
TRBV20-1	TRBJ2-1	TRBC2	CSAMTSGSHNEQFF	TGCAGTGCTATGACTAGCGGGTCCCACAATGAGCAGTTCTTC	1	0.0454545
TRBV20-1	TRBJ1-6	TRBC1	CSAPPGSPNSPLHF	TGCAGTGCCCCCCCCGGGTCCCCAAATTCACCCCTCCACTTT	1	0.0454545
TRBV20-1	TRBJ2-5	TRBC2	CSARDLFERGYQETQYF	TGCAGTGCTAGAGATCTCTTTGAGCGGGGGTACCAAGAGACCCAGTACTTC	1	0.0454545
TRBV20-1	TRBJ2-1	TRBC2	CSARDLGWREVNREQFF	TGCAGTGCTAGAGATCTAGGTTGGCGGGAGGTTAATCGGGAGCAGTTCTTC	1	0.0454545
TRBV20-1	TRBJ2-1	TRBC2	CSARDLLAGDGEQFF	TGCAGTGCTAGGGACCTACTAGCGGGAGATGGTGAGCAGTTCTTC	1	0.0454545
TRBV20-1	TRBJ2-2	TRBC2	CSARDLPGGTGELFF	TGCAGTGCTAGAGATCTGCCAGGGGGGACCGGGGAGCTGTTTTTT	1	0.0454545
TRBV20-1	TRBJ1-1	TRBC1	CSARDPLGGTEAFF	TGCAGTGCTAGAGATCCACTGGGAGGCACTGAAGCTTTCTTT	1	0.0454545
TRBV20-1	TRBJ2-1	TRBC2	CSARDPNHMIYNEQFF	TGCAGTGCTAGAGATCCGAACCATATGATTTACAATGAGCAGTTCTTC	1	0.0454545
TRBV20-1	TRBJ2-5	TRBC2	CSARDQETQYF	TGCAGTGCTAGGGACCAAGAGACCCAGTACTTC	1	0.0454545
TRBV20-1	TRBJ2-3	TRBC2	CSAREGGTDTQYF	TGCAGTGCTAGAGAAGGGGGCACAGATACGCAGTATTTT	1	0.0454545
TRBV20-1	TRBJ1-5	TRBC1	CSARETSHQPQHF	TGCAGTGCTAGAGAGACGAGCCATCAGCCCCAGCATTTT	1	0.0454545
TRBV20-1	TRBJ1-1	TRBC1	CSARGLGQGFEAFF	TGCAGTGCTAGGGGTCTGGGACAGGGATTTGAAGCTTTCTTT	1	0.0454545
TRBV20-1	TRBJ2-7	TRBC2	CSARVRTGHEQYF	TGCAGTGCTAGAGTTAGGACAGGGCACGAGCAGTACTTC	1	0.0454545
TRBV20-1	TRBJ2-7	TRBC2	CSARVRVGGPYEQYF	TGCAGTGCTAGAGTAAGGGTCGGAGGGCCCTACGAGCAGTACTTC	1	0.0454545
TRBV20-1	TRBJ2-7	TRBC2	CSASGDSLYF	TGCAGTGCCAGCGGGGACTCGTTGTACTTC	1	0.0454545
TRBV20-1	TRBJ1-6	TRBC1	CSASQGYINSPLHF	TGCAGTGCTAGCCAGGGGTATATTAATTCACCCCTCCACTTT	1	0.0454545
TRBV20-1	TRBJ2-7	TRBC2	CSASSDSYEQYF	TGCAGTGCTAGCAGCGACAGCTACGAGCAGTACTTC	1	0.0454545
TRBV20-1	TRBJ2-1	TRBC2	CSASSPRVVYNEQFF	TGCAGTGCTAGCTCCCCCAGGGTTGTCTACAATGAGCAGTTCTTC	1	0.0454545
TRBV20-1	TRBJ1-6	TRBC1	CSATKSRTGGSPLHF	TGCAGTGCAACGAAATCCAGGACAGGGGGTTCACCCCTCCACTTT	1	0.0454545
TRBV20-1	TRBJ2-6	TRBC2	CSAWTSGSSGANVLTF	TGCAGTGCATGGACTAGCGGGAGCTCTGGGGCCAACGTCCTGACTTTC	1	0.0454545
TRBV20-1	TRBJ1-1	TRBC1	CSGGSGVLTEAFF	TGCAGCGGGGGGTCGGGGGTGCTCACTGAAGCTTTCTTT	1	0.0454545
TRBV29-1	TRBJ2-3	TRBC2	CSVDDRLKPVDTQYF	TGCAGCGTTGACGACCGGCTTAAGCCCGTAGATACGCAGTATTTT	1	0.0454545
TRBV29-1	TRBJ2-1	TRBC2	CSVEQRDNEQFF	TGCAGCGTTGAACAGCGAGACAATGAGCAGTTCTTC	1	0.0454545
TRBV29-1	TRBJ1-1	TRBC1	CSVEVGRANTEAFF	TGCAGCGTTGAAGTGGGCAGGGCGAACACTGAAGCTTTCTTT	1	0.0454545
TRBV29-1	TRBJ1-6	TRBC1	CSVVAGVGSPLHF	TGCAGCGTTGTGGCTGGGGTGGGATCACCCCTCCACTTT	1	0.0454545
TRBV15	TRBJ2-5	TRBC2	CATSGWWVGGRSLETQYF	TGTGCCACCAGCGGCTGGTGGGTTGGCGGGAGATCATTGGAGACCCAGTACTTC	2	0.0909091
TRBV28	TRBJ1-2	TRBC1	CASSLYGGVNYGYTF	TGTGCCAGCAGTTTATATGGAGGGGTAAACTATGGCTACACCTTC	1	0.0454545
TRBV10-3	TRBJ2-1	TRBC2	CAIGQGVVNEQFF	TGTGCCATCGGACAGGGGGTCGTCAATGAGCAGTTCTTC	1	0.0454545
TRBV12-4	TRBJ1-2	TRBC1	CASTKTRDRGPYGYTF	TGTGCCAGCACCAAAACCCGCGACAGGGGCCCATATGGCTACACCTTC	1	0.0454545
TRBV5-1	TRBJ1-2	TRBC1	CASSLDRGIAYGYTF	TGCGCCAGCAGCTTAGACAGAGGGATTGCCTATGGCTACACCTTC	1	0.0454545
					2198

## Sheet: 769
v_gene	j_gene	c_gene	cdr3	cdr3_nt	counts	frequency	phenotype	public	private
TRBV5-4	TRBJ2-1	TRBC2	CASSIGLAGGTYNEQFF	TGTGCCAGCAGCATAGGACTAGCGGGAGGAACCTACAATGAGCAGTTCTTC	157	11.1744	CD4	P
TRBV12-4	TRBJ2-6	TRBC2	CASSSDPGQGPSGANVLTF*	TGTGCCAGCAGTTCAGATCCGGGACAGGGTCCATCTGGGGCCAACGTCCTGACTTTC	50	3.55872	CD8	P
TRBV7-9	TRBJ2-7	TRBC2	CASSFGTVTYEQYF	TGTGCCAGCAGCTTTGGGACAGTAACCTACGAGCAGTACTTC	49	3.48754	CD8	P
TRBV5-6	TRBJ2-1	TRBC2	CASSLWAGGKFF	TGTGCCAGCAGCTTGTGGGCAGGGGGAAAGTTCTTC	39	2.7758	CD8	P
TRBV20-1	TRBJ1-2	TRBC1	CSARDTAYGYTF	TGCAGTGCTAGAGATACAGCCTATGGCTACACCTTC	36	2.56228	CD8	P
TRBV7-6	TRBJ2-3	TRBC2	CASSDYTDTQYF	TGTGCCAGCAGCGACTACACAGATACGCAGTATTTT	35	2.4911	CD8	P
TRBV4-1	TRBJ1-2	TRBC1	CASSLGGVAYGYTF	TGCGCCAGCAGCCTTGGTGGGGTAGCATATGGCTACACCTTC	21	1.49466	CD8	P
TRBV4-1	TRBJ1-1	TRBC1	CASSLGQGSSLAFF	TGCGCCAGCAGCTTAGGACAGGGGAGTTCTCTAGCTTTCTTT	17	1.20996	CD8	P
TRBV20-1	TRBJ1-1	TRBC1	CSAPERAMNTEAFF	TGCAGTGCCCCCGAGAGGGCCATGAACACTGAAGCTTTCTTT	17	1.20996	CD8	P
TRBV5-4	TRBJ1-6	TRBC1	CASSLLVGSTYSYDSPLHF	TGTGCCAGCAGCTTGTTGGTAGGAAGTACCTATTCTTATGATTCACCCCTCCACTTT	73	5.19573	CD8		P
TRBV12-4	TRBJ2-1	TRBC2	CASSGDTSDVYEQFF	TGTGCCAGCAGTGGGGACACCTCCGATGTTTATGAGCAGTTCTTC	72	5.12456	CD8		P
TRBV5-6	TRBJ1-1	TRBC1	CASSLVWYAEAFF	TGTGCCAGCAGCTTGGTATGGTACGCTGAAGCTTTCTTT	32	2.27758	CD8		P
TRBV28	TRBJ2-7	TRBC2	CASSFYPSFHEQYF	TGTGCCAGCAGTTTTTATCCTAGCTTCCACGAGCAGTACTTC	31	2.20641	CD8		P
TRBV5-6	TRBJ2-7	TRBC2	CASSLHRSVEYYGYEQYF	TGTGCCAGCAGCTTGCACAGGTCTGTCGAGTACTACGGCTACGAGCAGTACTTC	23	1.63701	CD8		P
TRBV4-2	TRBJ2-5	TRBC2	CASSQDPEPIPEYF	TGTGCCAGCAGCCAAGACCCAGAACCGATTCCCGAGTACTTC	17	1.20996	CD8		P
TRBV6-1	TRBJ2-7	TRBC2	CASRHREHLYEQYF	TGTGCCAGCAGGCACCGGGAGCACCTTTACGAGCAGTACTTC	16	1.13879	CD4		P
TRBV2	TRBJ2-1	TRBC2	CASSETLAGGRTEQFF	TGTGCCAGCAGTGAAACCCTAGCGGGAGGTAGGACTGAGCAGTTCTTC	13	0.925267
TRBV4-1	TRBJ2-1	TRBC2	CASSQAGDQYNEQFF	TGCGCCAGCAGCCAAGCGGGGGATCAGTACAATGAGCAGTTCTTC	12	0.854093
TRBV19	TRBJ2-1	TRBC2	CASSIDSTGSSYNEQFF	TGTGCCAGTAGTATAGATTCCACGGGGAGCTCCTACAATGAGCAGTTCTTC	11	0.782918
TRBV9	TRBJ2-2	TRBC2	CASSPLDGYRVGELFF	TGTGCCAGCAGTCCCCTCGATGGCTACAGGGTCGGGGAGCTGTTTTTT	11	0.782918
TRBV19	TRBJ2-2	TRBC2	CASTEAGTGGFWDTGELFF	TGTGCCAGTACAGAAGCCGGGACAGGGGGCTTTTGGGACACCGGGGAGCTGTTTTTT	10	0.711744
TRBV30	TRBJ2-7	TRBC2	CAWSVSLAGATYEQYF	TGTGCCTGGAGTGTTAGCCTAGCGGGGGCCACCTACGAGCAGTACTTC	10	0.711744
TRBV5-4	TRBJ2-5	TRBC2	CASSLGLAGQETQYF	TGTGCCAGCAGCTTGGGACTAGCGGGCCAAGAGACCCAGTACTTC	8	0.569395
TRBV12-3	TRBJ1-1	TRBC1	CASSLLGQNTEAFF	TGTGCCAGCAGTTTACTAGGACAGAACACTGAAGCTTTCTTT	8	0.569395
TRBV4-2	TRBJ2-7	TRBC2	CASSQEVGTPTYEQYF	TGTGCCAGCAGCCAAGAGGTAGGGACTCCAACCTACGAGCAGTACTTC	8	0.569395
TRBV9	TRBJ1-2	TRBC1	CASSVGGPYGYTF	TGTGCCAGCAGCGTAGGGGGACCCTATGGCTACACCTTC	8	0.569395
TRBV5-5	TRBJ2-7	TRBC2	CASSFYEQYF	TGTGCCAGCAGCTTCTACGAGCAGTACTTC	7	0.498221
TRBV7-6	TRBJ2-2	TRBC2	CASGRSGAGELFF	TGTGCCAGTGGCAGGAGTGGCGCCGGGGAGCTGTTTTTT	6	0.427046
TRBV27	TRBJ2-2	TRBC2	CASRQRYMNTGELFF	TGTGCCAGCAGACAGCGCTACATGAACACCGGGGAGCTGTTTTTT	6	0.427046
TRBV19	TRBJ1-5	TRBC1	CASSEKRDRVSNQPQHF	TGTGCCAGTAGTGAAAAACGGGACAGGGTGTCCAATCAGCCCCAGCATTTT	6	0.427046
TRBV5-4	TRBJ2-3	TRBC2	CASSLRQGADTQYF	TGTGCCAGCAGCTTGCGACAGGGGGCAGATACGCAGTATTTT	6	0.427046
TRBV4-1	TRBJ2-7	TRBC2	CASSQGASGRAYEQYF	TGCGCCAGCAGCCAAGGGGCTAGCGGGAGGGCCTACGAGCAGTACTTC	6	0.427046
TRBV13	TRBJ1-2	TRBC1	CASSFPTGNYGYTF	TGTGCCAGCAGCTTCCCGACAGGGAACTATGGCTACACCTTC	5	0.355872
TRBV11-3	TRBJ2-1	TRBC2	CASSLGGPSYNEQFF	TGTGCCAGCAGCTTAGGGGGCCCCTCATACAATGAGCAGTTCTTC	5	0.355872
TRBV5-4	TRBJ2-6	TRBC2	CASSPWTGGATGANVLTF	TGTGCCAGCAGCCCCTGGACAGGGGGCGCTACTGGGGCCAACGTCCTGACTTTC	5	0.355872
TRBV3-1	TRBJ2-5	TRBC2	CASSQDSRGPETQYF	TGTGCCAGCAGCCAAGATTCCAGGGGGCCGGAGACCCAGTACTTC	5	0.355872
TRBV4-1	TRBJ1-1	TRBC1	CASSQYWLERNTEAFF	TGCGCCAGCAGCCAATATTGGCTTGAGCGGAACACTGAAGCTTTCTTT	5	0.355872
TRBV19	TRBJ1-1	TRBC1	CASKHLNTEAFF	TGTGCCAGTAAGCACCTGAACACTGAAGCTTTCTTT	4	0.284698
TRBV5-6	TRBJ2-1	TRBC2	CASNPGLNNEQFF	TGTGCCAGCAACCCCGGACTAAACAATGAGCAGTTCTTC	4	0.284698
TRBV6-1	TRBJ2-7	TRBC2	CASRAPGLGVSYEQYF	TGTGCCAGCAGAGCACCGGGACTAGGGGTCTCCTACGAGCAGTACTTC	4	0.284698
TRBV19	TRBJ2-7	TRBC2	CASSADRGTSGGSYEQYF	TGTGCCAGTAGCGCCGACCGAGGGACTAGCGGGGGTTCCTACGAGCAGTACTTC	4	0.284698
TRBV5-1	TRBJ2-1	TRBC2	CASSAGGSSYNEQFF	TGCGCCAGCAGTGCTGGCGGGAGCTCCTACAATGAGCAGTTCTTC	4	0.284698
TRBV5-1	TRBJ2-1	TRBC2	CASSPGGSSYNEQFF	TGCGCCAGCAGCCCCGGGGGCAGCTCCTACAATGAGCAGTTCTTC	4	0.284698
TRBV5-1	TRBJ2-3	TRBC2	CASSSGQGPTDTQYF	TGCGCCAGCAGCTCAGGACAGGGGCCCACAGATACGCAGTATTTT	4	0.284698
TRBV5-4	TRBJ1-1	TRBC1	CASSSGQGYTEAFF	TGTGCCAGCAGCTCCGGACAGGGTTACACTGAAGCTTTCTTT	4	0.284698
TRBV20-1	TRBJ2-7	TRBC2	CSARAWTGTGYEQYF	TGCAGTGCTAGGGCCTGGACAGGGACGGGCTACGAGCAGTACTTC	4	0.284698
TRBV29-1	TRBJ1-1	TRBC1	CSVNRGAGGTEAFF	TGCAGCGTGAACCGCGGGGCAGGAGGGACTGAAGCTTTCTTT	4	0.284698
TRBV28	TRBJ1-2	TRBC1	CASINDRNYGYTF	TGTGCCAGCATCAACGACCGCAACTATGGCTACACCTTC	3	0.213523
TRBV5-1	TRBJ1-3	TRBC1	CASNSGDASSGNTIYF	TGCGCCAGCAATTCAGGCGATGCGAGCTCTGGAAACACCATATATTTT	3	0.213523
TRBV7-9	TRBJ2-3	TRBC2	CASSFLRQRITDTQYF	TGTGCCAGCAGCTTTCTCCGCCAGCGGATCACAGATACGCAGTATTTT	3	0.213523
TRBV28	TRBJ2-7	TRBC2	CASSFPQSYEQYF	TGTGCCAGCAGTTTCCCCCAGTCCTACGAGCAGTACTTC	3	0.213523
TRBV2	TRBJ1-1	TRBC1	CASSGDSPEAFF	TGTGCCAGCAGTGGGGACAGCCCTGAAGCTTTCTTT	3	0.213523
TRBV7-9	TRBJ1-2	TRBC1	CASSLTDSGYGYTF	TGTGCCAGCAGCTTAACGGACAGTGGATATGGCTACACCTTC	3	0.213523
TRBV18	TRBJ2-3	TRBC2	CASSPPKQGRSDTQYF	TGTGCCAGCTCACCACCGAAGCAGGGCCGATCAGATACGCAGTATTTT	3	0.213523
TRBV4-2	TRBJ2-7	TRBC2	CASSRWGQDLYEQYF	TGTGCCAGCAGCCGATGGGGACAGGACCTCTACGAGCAGTACTTC	3	0.213523
TRBV18	TRBJ2-5	TRBC2	CASSTGTEFQETQYF	TGTGCCAGCTCAACCGGGACGGAATTTCAAGAGACCCAGTACTTC	3	0.213523
TRBV9	TRBJ2-1	TRBC2	CASSVVSSGRNYNEQFF	TGTGCCAGCAGCGTAGTTAGTAGCGGGAGAAATTACAATGAGCAGTTCTTC	3	0.213523
TRBV20-1	TRBJ2-3	TRBC2	CSAMTSGRTDTQYF	TGCAGTGCCATGACTAGCGGCCGCACAGATACGCAGTATTTT	3	0.213523
TRBV20-1	TRBJ2-6	TRBC2	CSATVSGANVLTF	TGCAGTGCTACAGTCTCTGGGGCCAACGTCCTGACTTTC	3	0.213523
TRBV10-3	TRBJ2-7	TRBC2	CAISASPGLASYEQYF	TGTGCCATCAGTGCCTCCCCGGGACTAGCATCCTACGAGCAGTACTTC	2	0.142349
TRBV10-3	TRBJ1-2	TRBC1	CAISGQGRYGYTF	TGTGCCATCAGTGGGCAGGGTCGCTATGGCTACACCTTC	2	0.142349
TRBV6-5	TRBJ2-3	TRBC2	CASRGLITDTQYF	TGTGCCAGCAGAGGACTGATCACAGATACGCAGTATTTT	2	0.142349
TRBV5-1	TRBJ2-2	TRBC2	CASSAAPAGELFF	TGCGCCAGCAGCGCGGCCCCGGCCGGGGAGCTGTTTTTT	2	0.142349
TRBV6-1	TRBJ1-3	TRBC1	CASSEWGTGGPSSGNTIYF	TGTGCCAGCAGTGAATGGGGGACAGGGGGGCCTAGCTCTGGAAACACCATATATTTT	2	0.142349
TRBV5-5	TRBJ2-3	TRBC2	CASSFITGGPGDTQYF	TGTGCCAGCAGCTTTATAACGGGAGGGCCTGGAGATACGCAGTATTTT	2	0.142349
TRBV9	TRBJ2-1	TRBC2	CASSGGQGIYNEQFF	TGTGCCAGCAGCGGGGGACAGGGGATCTACAATGAGCAGTTCTTC	2	0.142349
TRBV9	TRBJ2-3	TRBC2	CASSGSGSSDTQYF	TGTGCCAGCAGCGGCAGCGGGAGTTCGGATACGCAGTATTTT	2	0.142349
TRBV7-6	TRBJ2-5	TRBC2	CASSLALGTSGRAETQYF	TGTGCCAGCAGCTTAGCGCTGGGAACTAGCGGGAGGGCAGAGACCCAGTACTTC	2	0.142349
TRBV5-1	TRBJ2-1	TRBC2	CASSLEAGRAVHEQFF	TGCGCCAGCAGCTTGGAGGCGGGACGGGCGGTTCATGAGCAGTTCTTC	2	0.142349
TRBV12-4	TRBJ2-2	TRBC2	CASSLFSGRDTGELFF	TGTGCCAGCAGTTTATTTAGCGGGAGGGACACCGGGGAGCTGTTTTTT	2	0.142349
TRBV28	TRBJ1-1	TRBC1	CASSLRGWGWGRNTEAFF	TGTGCCAGCAGTTTACGCGGGTGGGGGTGGGGGCGAAACACTGAAGCTTTCTTT	2	0.142349
TRBV12-3	TRBJ1-6	TRBC1	CASSLVGDSPLHF	TGTGCCAGCAGTTTAGTGGGGGACTCACCCCTCCACTTT	2	0.142349
TRBV7-8	TRBJ2-5	TRBC2	CASSLVQGFGETKETQYF	TGTGCCAGCAGCTTAGTGCAGGGATTTGGCGAAACGAAAGAGACCCAGTACTTC	2	0.142349
TRBV7-6	TRBJ1-1	TRBC1	CASSLYSGGNTEAFF	TGTGCCAGCAGCTTATATTCCGGGGGTAACACTGAAGCTTTCTTT	2	0.142349
TRBV9	TRBJ2-7	TRBC2	CASSPGGYEQYF	TGTGCCAGCAGTCCAGGGGGGTACGAGCAGTACTTC	2	0.142349
TRBV4-2	TRBJ2-2	TRBC2	CASSQDIPSGRVNTGELFF	TGTGCCAGCAGCCAAGATATCCCTAGCGGGAGGGTAAACACCGGGGAGCTGTTTTTT	2	0.142349
TRBV14	TRBJ2-7	TRBC2	CASSQSSAVSYEQYF	TGTGCCAGCAGCCAAAGTAGCGCCGTCTCCTACGAGCAGTACTTC	2	0.142349
TRBV12-3	TRBJ1-1	TRBC1	CASSRGVGKTEAFF	TGTGCCAGCAGCCGCGGTGTGGGAAAGACTGAAGCTTTCTTT	2	0.142349
TRBV5-8	TRBJ2-3	TRBC2	CASSRLGGWHTDTQYF	TGTGCCAGCAGCCGACTCGGGGGGTGGCACACAGATACGCAGTATTTT	2	0.142349
TRBV7-9	TRBJ2-1	TRBC2	CASSRNDRGSSEQFF	TGTGCCAGCAGCCGGAACGACAGGGGATCAAGTGAGCAGTTCTTC	2	0.142349
TRBV14	TRBJ1-2	TRBC1	CASSRRREDGYTF	TGTGCCAGCAGCCGACGCAGGGAAGACGGCTACACCTTC	2	0.142349
TRBV7-9	TRBJ1-6	TRBC1	CASSSEQGFLDNSPLHF	TGTGCCAGCAGCTCGGAACAGGGGTTTCTTGACAATTCACCCCTCCACTTT	2	0.142349
TRBV7-9	TRBJ2-7	TRBC2	CASSTGGQSEQYF	TGTGCCAGCAGCACAGGGGGCCAAAGCGAGCAGTACTTC	2	0.142349
TRBV6-5	TRBJ1-1	TRBC1	CASSYSRRVTEAFF	TGTGCCAGCAGTTACTCGAGACGGGTCACTGAAGCTTTCTTT	2	0.142349
TRBV3-1	TRBJ2-1	TRBC2	CASTAGTSWDEQFF	TGTGCCAGCACCGCCGGGACCTCTTGGGATGAGCAGTTCTTC	2	0.142349
TRBV2	TRBJ2-5	TRBC2	CASTAQYTRGETQYF	TGTGCCAGCACCGCTCAGTATACACGGGGAGAGACCCAGTACTTC	2	0.142349
TRBV7-9	TRBJ1-2	TRBC1	CASTTQGAYGYTF	TGTGCCAGCACCACACAAGGGGCCTATGGCTACACCTTC	2	0.142349
TRBV10-2	TRBJ2-2	TRBC2	CASWAAGRKTGELFF	TGCGCCAGTTGGGCTGCCGGAAGGAAAACCGGGGAGCTGTTTTTT	2	0.142349
TRBV24-1	TRBJ1-5	TRBC1	CATSDRGDRAVQPQHF	TGTGCCACCAGTGATCGGGGGGACAGGGCGGTTCAGCCCCAGCATTTT	2	0.142349
TRBV15	TRBJ2-3	TRBC2	CATSRAGLAGRTDTQYF	TGTGCCACCAGCAGAGCGGGACTAGCGGGACGCACAGATACGCAGTATTTT	2	0.142349
TRBV20-1	TRBJ1-2	TRBC1	CSAIAGGTNYGYTF	TGCAGTGCTATAGCGGGGGGCACCAACTATGGCTACACCTTC	2	0.142349
TRBV20-1	TRBJ2-5	TRBC2	CSAQYQETQYF	TGCAGTGCTCAGTACCAAGAGACCCAGTACTTC	2	0.142349
TRBV20-1	TRBJ2-1	TRBC2	CSARDRGLAGDRSNEQFF	TGCAGTGCTAGAGATCGTGGGCTAGCGGGAGATCGGTCGAATGAGCAGTTCTTC	2	0.142349
TRBV20-1	TRBJ2-1	TRBC2	CSARDRSEQFF	TGCAGTGCTAGAGATAGGAGTGAGCAGTTCTTC	2	0.142349
TRBV20-1	TRBJ2-7	TRBC2	CSAVSGRAASYEQYF	TGCAGTGCTGTTAGCGGGAGGGCCGCGTCCTACGAGCAGTACTTC	2	0.142349
TRBV7-2	TRBJ2-7	TRBC2	CAAEDLAYEQYF	TGTGCCGCAGAGGACTTGGCCTACGAGCAGTACTTC	1	0.0711744
TRBV3-1	TRBJ2-5	TRBC2	CAGRDSGGTQYF	TGTGCCGGCAGGGATAGTGGGGGGACCCAGTACTTC	1	0.0711744
TRBV10-3	TRBJ2-7	TRBC2	CAINQYMEGGEQYF	TGTGCCATCAATCAATATATGGAGGGGGGCGAGCAGTACTTC	1	0.0711744
TRBV28	TRBJ2-4	TRBC2	CAIRGQGKKGNIQYF	TGTGCCATCCGAGGACAGGGGAAAAAAGGAAACATTCAGTACTTC	1	0.0711744
TRBV10-3	TRBJ1-5	TRBC1	CAIRKTGDNQPQHF	TGTGCCATCAGAAAGACAGGGGACAATCAGCCCCAGCATTTT	1	0.0711744
TRBV10-3	TRBJ2-7	TRBC2	CAISDSSYEQYF	TGTGCCATCAGTGACAGCTCCTACGAGCAGTACTTC	1	0.0711744
TRBV10-3	TRBJ2-7	TRBC2	CAISEPYRGASHEQYF	TGTGCCATCAGTGAGCCCTATCGGGGTGCTTCCCACGAGCAGTACTTC	1	0.0711744
TRBV10-3	TRBJ2-1	TRBC2	CAISESMGAGNYNEQFF	TGTGCCATCAGTGAGTCGATGGGAGCAGGCAACTACAATGAGCAGTTCTTC	1	0.0711744
TRBV10-3	TRBJ1-1	TRBC1	CAISGEGREAFF	TGTGCCATCAGTGGAGAGGGGCGCGAAGCTTTCTTT	1	0.0711744
TRBV10-3	TRBJ2-1	TRBC2	CAISKKNSRSSYNEQFF	TGTGCCATCAGTAAAAAAAATAGCCGTAGCTCCTACAATGAGCAGTTCTTC	1	0.0711744
TRBV10-3	TRBJ1-2	TRBC1	CAISQGYGYTF	TGTGCCATCAGTCAGGGTTATGGCTACACCTTC	1	0.0711744
TRBV10-3	TRBJ1-3	TRBC1	CAISSLDRSGNTIYF	TGTGCCATCAGTTCCCTCGACAGGTCTGGAAACACCATATATTTT	1	0.0711744
TRBV10-3	TRBJ2-7	TRBC2	CAQRSRPKGQVFSYEQYF	TGTGCCCAACGTTCGCGGCCGAAGGGACAGGTTTTCTCCTACGAGCAGTACTTC	1	0.0711744
TRBV7-9	TRBJ2-7	TRBC2	CASADSMAGRTPYEQYF	TGTGCCAGCGCGGACTCCATGGCGGGAAGGACCCCCTACGAGCAGTACTTC	1	0.0711744
TRBV27	TRBJ2-7	TRBC2	CASAPLASSSYEQYF	TGTGCCAGCGCCCCTCTAGCATCGAGCTCCTACGAGCAGTACTTC	1	0.0711744
TRBV6-1	TRBJ1-6	TRBC1	CASDRGQNSPLHF	TGTGCCAGTGACAGGGGGCAGAATTCACCCCTCCACTTT	1	0.0711744
TRBV12-4	TRBJ1-1	TRBC1	CASEFGGVPEAFF	TGTGCCAGCGAATTTGGTGGGGTTCCTGAAGCTTTCTTT	1	0.0711744
TRBV6-6	TRBJ2-2	TRBC2	CASGAGGHTGELFF	TGTGCCAGCGGGGCGGGAGGCCACACCGGGGAGCTGTTTTTT	1	0.0711744
TRBV19	TRBJ2-1	TRBC2	CASGASGYNEQFF	TGTGCCAGCGGTGCCTCTGGATACAATGAGCAGTTCTTC	1	0.0711744
TRBV12-5	TRBJ1-3	TRBC1	CASGFHRGRGNTIYF	TGTGCTAGTGGTTTCCACAGGGGGCGTGGAAACACCATATATTTT	1	0.0711744
TRBV2	TRBJ2-2	TRBC2	CASGGDRGPTGELFF	TGTGCCAGTGGAGGGGACAGGGGACCCACCGGGGAGCTGTTTTTT	1	0.0711744
TRBV2	TRBJ2-2	TRBC2	CASGGGAHTGELFF	TGTGCCAGCGGAGGTGGGGCCCACACCGGGGAGCTGTTTTTT	1	0.0711744
TRBV12-4	TRBJ1-1	TRBC1	CASGQGGNTEAFF	TGTGCCAGCGGACAGGGCGGGAACACTGAAGCTTTCTTT	1	0.0711744
TRBV6-1	TRBJ1-1	TRBC1	CASILDSITEAFF	TGTGCCAGCATTTTGGACAGTATCACTGAAGCTTTCTTT	1	0.0711744
TRBV2	TRBJ2-2	TRBC2	CASIPASGTFTPNTGELFF	TGTGCCAGCATCCCGGCTAGCGGGACTTTCACCCCGAACACCGGGGAGCTGTTTTTT	1	0.0711744
TRBV2	TRBJ2-6	TRBC2	CASLEVPASGANVLTF	TGTGCCAGCCTTGAAGTTCCAGCCTCTGGGGCCAACGTCCTGACTTTC	1	0.0711744
TRBV2	TRBJ2-3	TRBC2	CASNEASTDTQYF	TGTGCCAGCAACGAAGCTAGCACAGATACGCAGTATTTT	1	0.0711744
TRBV19	TRBJ1-2	TRBC1	CASNEDPRQWEFYGYTF	TGTGCCAGTAACGAGGATCCTAGACAGTGGGAGTTCTATGGCTACACCTTC	1	0.0711744
TRBV30	TRBJ1-2	TRBC1	CASPTPGRFTNYGYTF	TGTGCCTCCCCGACCCCCGGACGCTTCACTAACTATGGCTACACCTTC	1	0.0711744
TRBV9	TRBJ2-6	TRBC2	CASQKGSGANVLTF	TGTGCCAGCCAGAAGGGTTCTGGGGCCAACGTCCTGACTTTC	1	0.0711744
TRBV5-4	TRBJ1-2	TRBC1	CASRAPLSYGYTF	TGTGCCAGCCGCGCCCCCCTTTCCTATGGCTACACCTTC	1	0.0711744
TRBV5-1	TRBJ2-6	TRBC2	CASRDLSGANVLTF	TGCGCCAGCAGGGACCTCTCTGGGGCCAACGTCCTGACTTTC	1	0.0711744
TRBV27	TRBJ2-7	TRBC2	CASRFPASDEQYF	TGTGCCAGCCGTTTCCCGGCTAGCGACGAGCAGTACTTC	1	0.0711744
TRBV2	TRBJ2-5	TRBC2	CASRGGPSTETQYF	TGTGCCAGCAGGGGAGGGCCTAGCACAGAGACCCAGTACTTC	1	0.0711744
TRBV19	TRBJ1-1	TRBC1	CASRGGTNTEAFF	TGTGCCAGTCGGGGCGGAACGAACACTGAAGCTTTCTTT	1	0.0711744
TRBV6-1	TRBJ2-7	TRBC2	CASRGTASYEQYF	TGTGCCAGCAGGGGGACAGCCTCCTACGAGCAGTACTTC	1	0.0711744
TRBV7-2	TRBJ2-3	TRBC2	CASRKLTDTQYF	TGTGCCAGCAGGAAGCTCACAGATACGCAGTATTTT	1	0.0711744
TRBV6-1	TRBJ2-1	TRBC2	CASRKRGISYNEQFF	TGTGCCAGCAGGAAACGGGGGATCTCCTACAATGAGCAGTTCTTC	1	0.0711744
TRBV10-1	TRBJ2-3	TRBC2	CASRLAAADTQYF	TGCGCCAGCCGACTAGCAGCGGCAGATACGCAGTATTTT	1	0.0711744
TRBV7-9	TRBJ2-7	TRBC2	CASRLGAAPGEQYF	TGTGCCAGCAGGCTCGGGGCCGCCCCGGGGGAGCAGTACTTC	1	0.0711744
TRBV5-1	TRBJ2-3	TRBC2	CASRLGTSGFTDTQYF	TGCGCCAGCAGACTCGGGACTAGCGGGTTCACAGATACGCAGTATTTT	1	0.0711744
TRBV27	TRBJ2-1	TRBC2	CASRLQGSYNEQFF	TGTGCCAGCAGATTACAGGGCTCCTACAATGAGCAGTTCTTC	1	0.0711744
TRBV6-2	TRBJ2-5	TRBC2	CASRNGLAGRETQYF	TGTGCCAGCAGAAACGGACTAGCGGGTCGGGAGACCCAGTACTTC	1	0.0711744
TRBV6-1	TRBJ2-3	TRBC2	CASRPLVADTQYF	TGTGCCAGCAGACCTCTAGTGGCAGATACGCAGTATTTT	1	0.0711744
TRBV12-3	TRBJ1-4	TRBC1	CASRPTGGNEKLFF	TGTGCCAGCAGACCTACAGGGGGGAATGAAAAACTGTTTTTT	1	0.0711744
TRBV6-5	TRBJ2-1	TRBC2	CASRRGEGRIAGPEQFF	TGTGCCAGCAGACGGGGGGAAGGAAGAATAGCGGGCCCCGAGCAGTTCTTC	1	0.0711744
TRBV27	TRBJ2-2	TRBC2	CASRRQGGNTGELFF	TGTGCCAGCAGAAGACAGGGTGGGAACACCGGGGAGCTGTTTTTT	1	0.0711744
TRBV13	TRBJ2-3	TRBC2	CASRRTSGGTDTQYF	TGTGCCAGCAGACGGACTAGCGGGGGCACAGATACGCAGTATTTT	1	0.0711744
TRBV10-2	TRBJ2-7	TRBC2	CASRTGGYEQYF	TGCGCCAGCAGGACAGGGGGCTACGAGCAGTACTTC	1	0.0711744
TRBV5-1	TRBJ2-2	TRBC2	CASRTGTANTGELFF	TGCGCCAGCAGAACCGGGACAGCAAACACCGGGGAGCTGTTTTTT	1	0.0711744
TRBV6-5	TRBJ2-1	TRBC2	CASRTGYNEQFF	TGTGCCAGCCGGACAGGGTACAATGAGCAGTTCTTC	1	0.0711744
TRBV5-1	TRBJ2-7	TRBC2	CASSADPPSYEQYF	TGCGCCAGCAGCGCCGACCCACCTTCTTACGAGCAGTACTTC	1	0.0711744
TRBV18	TRBJ1-1	TRBC1	CASSAGDLNTEAFF	TGTGCCAGCTCAGCAGGGGATCTGAACACTGAAGCTTTCTTT	1	0.0711744
TRBV7-3	TRBJ1-2	TRBC1	CASSAGVRDGGYTF	TGTGCCAGCAGCGCCGGTGTACGTGACGGTGGCTACACCTTC	1	0.0711744
TRBV6-1	TRBJ2-6	TRBC2	CASSANRYQRLSGANVLTF	TGTGCCAGCAGTGCTAACCGTTACCAGAGACTCTCTGGGGCCAACGTCCTGACTTTC	1	0.0711744
TRBV12-3	TRBJ1-2	TRBC1	CASSAQTGNYGYTF	TGTGCCAGCAGTGCCCAGACAGGGAACTATGGCTACACCTTC	1	0.0711744
TRBV27	TRBJ1-1	TRBC1	CASSARTYNTEAFF	TGTGCCAGCAGCGCCCGGACCTATAACACTGAAGCTTTCTTT	1	0.0711744
TRBV2	TRBJ1-2	TRBC1	CASSATGGIWGYTF	TGTGCCAGCAGCGCGACAGGGGGCATTTGGGGCTACACCTTC	1	0.0711744
TRBV10-1	TRBJ2-2	TRBC2	CASSDAAKNTGELFF	TGCGCCAGCAGTGATGCAGCGAAGAACACCGGGGAGCTGTTTTTT	1	0.0711744
TRBV9	TRBJ1-6	TRBC1	CASSDGTGGSRSPLHF	TGTGCCAGCAGCGATGGGACAGGGGGCTCTCGTTCACCCCTCCACTTT	1	0.0711744
TRBV6-4	TRBJ2-1	TRBC2	CASSDGTGGYNEQFF	TGTGCCAGCAGTGACGGGACAGGGGGCTACAATGAGCAGTTCTTC	1	0.0711744
TRBV10-2	TRBJ2-2	TRBC2	CASSDLAGGNTGELFF	TGCGCCAGCAGTGACCTAGCGGGAGGTAACACCGGGGAGCTGTTTTTT	1	0.0711744
TRBV6-1	TRBJ1-6	TRBC1	CASSDPIALGFGSPLHF	TGTGCCAGCAGTGACCCCATAGCCCTCGGCTTCGGTTCACCCCTCCACTTT	1	0.0711744
TRBV2	TRBJ2-2	TRBC2	CASSDRGDTGELFF	TGTGCCAGCAGTGACAGGGGAGACACCGGGGAGCTGTTTTTT	1	0.0711744
TRBV2	TRBJ2-5	TRBC2	CASSDSTETQYF	TGTGCCAGCAGTGACAGTACAGAGACCCAGTACTTC	1	0.0711744
TRBV6-1	TRBJ1-5	TRBC1	CASSDTGQPNQPQHF	TGTGCCAGCAGTGATACCGGACAGCCCAATCAGCCCCAGCATTTT	1	0.0711744
TRBV6-4	TRBJ2-3	TRBC2	CASSDTSGSTDTQYF	TGTGCCAGCAGTGACACTAGCGGGAGCACAGATACGCAGTATTTT	1	0.0711744
TRBV6-1	TRBJ2-4	TRBC2	CASSEARRDIQYF	TGTGCCAGCAGTGAAGCCCGACGAGACATTCAGTACTTC	1	0.0711744
TRBV2	TRBJ1-5	TRBC1	CASSEDGQGDEPQHF	TGTGCCAGCAGTGAAGACGGACAGGGGGATGAGCCCCAGCATTTT	1	0.0711744
TRBV6-1	TRBJ1-5	TRBC1	CASSEDNQPQHF	TGTGCCAGCAGTGAAGATAATCAGCCCCAGCATTTT	1	0.0711744
TRBV10-1	TRBJ2-1	TRBC2	CASSEFRQPPYNEQFF	TGCGCCAGCAGTGAGTTTCGGCAACCCCCCTACAATGAGCAGTTCTTC	1	0.0711744
TRBV2	TRBJ1-1	TRBC1	CASSEGGQGNTEAFF	TGTGCCAGCAGTGAGGGGGGACAGGGGAACACTGAAGCTTTCTTT	1	0.0711744
TRBV2	TRBJ2-7	TRBC2	CASSEGGSGPSYEQYF	TGTGCCAGCAGTGAAGGAGGTAGCGGGCCCTCCTACGAGCAGTACTTC	1	0.0711744
TRBV28	TRBJ1-1	TRBC1	CASSEGGTEAFF	TGTGCCAGCAGCGAGGGAGGGACTGAAGCTTTCTTT	1	0.0711744
TRBV9	TRBJ2-1	TRBC2	CASSEGPESGPRNEQFF	TGTGCCAGCAGCGAGGGCCCCGAATCGGGGCCACGAAATGAGCAGTTCTTC	1	0.0711744
TRBV2	TRBJ1-5	TRBC1	CASSEGRSSNQPQHF	TGTGCCAGCAGTGAAGGGCGCAGCAGCAATCAGCCCCAGCATTTT	1	0.0711744
TRBV2	TRBJ2-2	TRBC2	CASSEHTGELFF	TGTGCCAGCAGTGAACACACCGGGGAGCTGTTTTTT	1	0.0711744
TRBV25-1	TRBJ2-2	TRBC2	CASSEKGVGTGELFF	TGTGCCAGCAGTGAAAAGGGGGTAGGGACCGGGGAGCTGTTTTTT	1	0.0711744
TRBV10-1	TRBJ2-6	TRBC2	CASSESIPGANVLTF	TGCGCCAGCAGTGAGTCGATTCCAGGGGCCAACGTCCTGACTTTC	1	0.0711744
TRBV6-1	TRBJ2-7	TRBC2	CASSESPYEQYF	TGTGCCAGCAGTGAGTCCCCATACGAGCAGTACTTC	1	0.0711744
TRBV25-1	TRBJ2-5	TRBC2	CASSESSGGGQETQYF	TGTGCCAGCAGTGAATCATCGGGCGGGGGACAAGAGACCCAGTACTTC	1	0.0711744
TRBV10-1	TRBJ2-5	TRBC2	CASSESTSRGQETQYF	TGCGCCAGCAGTGAGTCAACTTCCAGGGGGCAAGAGACCCAGTACTTC	1	0.0711744
TRBV6-1	TRBJ2-7	TRBC2	CASSEYPDPYEQYF	TGTGCCAGCAGTGAATACCCGGATCCCTACGAGCAGTACTTC	1	0.0711744
TRBV5-5	TRBJ1-2	TRBC1	CASSFDNYGYTF	TGTGCCAGCAGCTTTGACAACTATGGCTACACCTTC	1	0.0711744
TRBV7-4	TRBJ1-4	TRBC1	CASSFDPEGEKLFF	TGTGCCAGCAGCTTTGACCCGGAAGGTGAAAAACTGTTTTTT	1	0.0711744
TRBV5-6	TRBJ1-6	TRBC1	CASSFDRGLSPLHF	TGTGCCAGCAGCTTCGACAGGGGGCTTTCACCCCTCCACTTT	1	0.0711744
TRBV5-1	TRBJ2-3	TRBC2	CASSFELAGVGTDTQYF	TGCGCCAGCAGTTTCGAACTAGCGGGAGTTGGGACAGATACGCAGTATTTT	1	0.0711744
TRBV5-6	TRBJ1-1	TRBC1	CASSFEREAFF	TGTGCCAGCAGCTTTGAGAGGGAAGCTTTCTTT	1	0.0711744
TRBV7-9	TRBJ2-1	TRBC2	CASSFGALAEQFF	TGTGCCAGCAGCTTCGGGGCCCTGGCTGAGCAGTTCTTC	1	0.0711744
TRBV5-4	TRBJ1-5	TRBC1	CASSFGINQPQHF	TGTGCCAGCAGCTTTGGAATCAATCAGCCCCAGCATTTT	1	0.0711744
TRBV7-9	TRBJ2-5	TRBC2	CASSFGLAGGETQYF	TGTGCCAGCAGCTTTGGACTAGCGGGAGGGGAGACCCAGTACTTC	1	0.0711744
TRBV11-2	TRBJ2-5	TRBC2	CASSFGLSQETQYF	TGTGCCAGCAGCTTTGGCCTTTCGCAAGAGACCCAGTACTTC	1	0.0711744
TRBV5-4	TRBJ2-1	TRBC2	CASSFGRGSGNEQFF	TGTGCCAGCAGCTTCGGTCGGGGCTCGGGGAATGAGCAGTTCTTC	1	0.0711744
TRBV28	TRBJ2-3	TRBC2	CASSFLLAGGLGGTDTQYF	TGTGCCAGCAGTTTCTTGCTAGCGGGAGGGCTTGGGGGCACAGATACGCAGTATTTT	1	0.0711744
TRBV28	TRBJ1-1	TRBC1	CASSFPLAGITLMTEAFF	TGTGCCAGCAGTTTTCCCCTAGCAGGGATAACCTTGATGACTGAAGCTTTCTTT	1	0.0711744
TRBV13	TRBJ1-2	TRBC1	CASSFPTGNYGYTF	TGTGCCAGCAGCTTCCCGACAGGGAACTATGGCTACACCTTC	1	0.0711744
TRBV5-6	TRBJ2-1	TRBC2	CASSFSPGSYNEQFF	TGTGCCAGCAGCTTTTCTCCGGGGTCCTACAATGAGCAGTTCTTC	1	0.0711744
TRBV2	TRBJ1-5	TRBC1	CASSGAHSNQPQHF	TGTGCCAGCAGCGGTGCTCATAGCAATCAGCCCCAGCATTTT	1	0.0711744
TRBV19	TRBJ2-7	TRBC2	CASSGDRYEQYF	TGTGCCAGTAGTGGAGACAGGTACGAGCAGTACTTC	1	0.0711744
TRBV2	TRBJ1-2	TRBC1	CASSGDSIYGYTF	TGTGCCAGCAGTGGGGACAGTATCTATGGCTACACCTTC	1	0.0711744
TRBV9	TRBJ2-7	TRBC2	CASSGQGNSYEQYF	TGTGCCAGCAGCGGACAGGGGAACTCCTACGAGCAGTACTTC	1	0.0711744
TRBV6-1	TRBJ1-1	TRBC1	CASSGRPNTEAFF	TGTGCCAGCAGTGGCCGCCCGAACACTGAAGCTTTCTTT	1	0.0711744
TRBV3-1	TRBJ2-7	TRBC2	CASSGSSYEQYF	TGTGCCAGCAGCGGGAGCTCCTACGAGCAGTACTTC	1	0.0711744
TRBV5-1	TRBJ1-5	TRBC1	CASSGYDRGRFRAQHF	TGCGCCAGCAGCGGATATGACAGGGGGAGGTTTCGGGCCCAGCATTTT	1	0.0711744
TRBV5-6	TRBJ2-7	TRBC2	CASSGYLGRDYEQYF	TGTGCCAGCAGCGGCTACCTAGGCAGGGACTACGAGCAGTACTTC	1	0.0711744
TRBV6-2	TRBJ2-1	TRBC2	CASSHGQENNEQFF	TGTGCCAGCAGCCACGGACAGGAAAACAATGAGCAGTTCTTC	1	0.0711744
TRBV3-1	TRBJ2-2	TRBC2	CASSHWRQGTGELFF	TGTGCCAGCAGCCACTGGAGACAGGGAACCGGGGAGCTGTTTTTT	1	0.0711744
TRBV28	TRBJ1-5	TRBC1	CASSIEEGAQPQHF	TGTGCCAGCAGTATAGAGGAAGGGGCTCAGCCCCAGCATTTT	1	0.0711744
TRBV19	TRBJ2-1	TRBC2	CASSIEVAGGLFF	TGTGCCAGTAGTATAGAGGTGGCGGGAGGGCTGTTCTTC	1	0.0711744
TRBV19	TRBJ1-4	TRBC1	CASSIFATNEKLFF	TGTGCCAGTAGTATCTTTGCAACTAATGAAAAACTGTTTTTT	1	0.0711744
TRBV19	TRBJ2-3	TRBC2	CASSIGSSTDTQYF	TGTGCCAGTAGTATAGGGTCTAGCACAGATACGCAGTATTTT	1	0.0711744
TRBV19	TRBJ2-7	TRBC2	CASSIKDSAPTYEQYF	TGTGCCAGTAGTATAAAGGACAGCGCCCCCACCTACGAGCAGTACTTC	1	0.0711744
TRBV19	TRBJ2-7	TRBC2	CASSIKGDSNYEQYF	TGTGCCAGTAGTATTAAGGGGGACAGCAACTACGAGCAGTACTTC	1	0.0711744
TRBV19	TRBJ2-2	TRBC2	CASSILADTGELFF	TGTGCCAGTAGTATACTAGCGGACACCGGGGAGCTGTTTTTT	1	0.0711744
TRBV5-6	TRBJ2-2	TRBC2	CASSILGRDANTGELFF	TGTGCCAGCAGCATCCTAGGTAGGGATGCGAACACCGGGGAGCTGTTTTTT	1	0.0711744
TRBV2	TRBJ2-1	TRBC2	CASSINEQFF	TGTGCCAGCAGTATCAATGAGCAGTTCTTC	1	0.0711744
TRBV19	TRBJ2-1	TRBC2	CASSINRGGRALEQFF	TGTGCCAGTAGTATAAATCGAGGCGGGAGGGCACTTGAGCAGTTCTTC	1	0.0711744
TRBV9	TRBJ2-5	TRBC2	CASSIPDREETQYF	TGTGCCAGCAGCATACCTGATAGGGAAGAGACCCAGTACTTC	1	0.0711744
TRBV5-4	TRBJ1-2	TRBC1	CASSIQLTNYGYTF	TGTGCCAGCAGCATACAGTTGACTAACTATGGCTACACCTTC	1	0.0711744
TRBV19	TRBJ2-3	TRBC2	CASSISGITLTDTQYF	TGTGCCAGTAGTATTAGCGGCATTACCCTCACAGATACGCAGTATTTT	1	0.0711744
TRBV13	TRBJ1-1	TRBC1	CASSITGQANTEAFF	TGTGCCAGCAGCATAACGGGACAGGCTAACACTGAAGCTTTCTTT	1	0.0711744
TRBV19	TRBJ2-7	TRBC2	CASSITTSGNVYEQYF	TGTGCCAGTAGTATAACGACTAGCGGGAATGTCTACGAGCAGTACTTC	1	0.0711744
TRBV19	TRBJ1-1	TRBC1	CASSIVRKNTEAFF	TGTGCCAGTAGTATAGTTCGGAAGAACACTGAAGCTTTCTTT	1	0.0711744
TRBV3-1	TRBJ2-3	TRBC2	CASSLAGADTQYF	TGTGCCAGCAGCCTAGCGGGAGCAGATACGCAGTATTTT	1	0.0711744
TRBV5-1	TRBJ2-7	TRBC2	CASSLAGLAGGPLHYEQYF	TGCGCCAGCAGCTTGGCGGGACTAGCGGGAGGGCCCCTCCACTACGAGCAGTACTTC	1	0.0711744
TRBV11-2	TRBJ2-7	TRBC2	CASSLAIASGVPYEQYF	TGTGCCAGCAGCTTAGCCATCGCGTCAGGGGTACCCTACGAGCAGTACTTC	1	0.0711744
TRBV5-1	TRBJ2-5	TRBC2	CASSLALETQYF	TGCGCCAGCAGCTTGGCCTTAGAGACCCAGTACTTC	1	0.0711744
TRBV7-2	TRBJ2-1	TRBC2	CASSLAWATSGERNEQFF	TGTGCCAGCAGCTTAGCCTGGGCGACTAGCGGAGAAAGGAATGAGCAGTTCTTC	1	0.0711744
TRBV11-2	TRBJ1-1	TRBC1	CASSLDAIGEAFF	TGTGCCAGCAGCTTAGATGCCATAGGTGAAGCTTTCTTT	1	0.0711744
TRBV7-6	TRBJ1-5	TRBC1	CASSLDIDNQPQHF	TGTGCCAGCAGCTTAGACATCGACAATCAGCCCCAGCATTTT	1	0.0711744
TRBV7-9	TRBJ1-1	TRBC1	CASSLDKAFF	TGTGCCAGCAGCCTCGACAAAGCTTTCTTT	1	0.0711744
TRBV7-6	TRBJ2-2	TRBC2	CASSLDPGFRSGELFF	TGTGCCAGCAGCTTAGATCCAGGGTTTAGATCCGGGGAGCTGTTTTTT	1	0.0711744
TRBV6-6	TRBJ1-2	TRBC1	CASSLDRGLNYGYTF	TGTGCCAGCAGTTTAGACAGGGGGCTAAACTATGGCTACACCTTC	1	0.0711744
TRBV7-9	TRBJ1-5	TRBC1	CASSLEGGNQPQHF	TGTGCCAGCAGCTTAGAGGGTGGGAATCAGCCCCAGCATTTT	1	0.0711744
TRBV5-4	TRBJ2-7	TRBC2	CASSLEPLGAYEQYF	TGTGCCAGCAGCTTGGAGCCGCTAGGAGCCTACGAGCAGTACTTC	1	0.0711744
TRBV11-3	TRBJ2-7	TRBC2	CASSLEYEQYF	TGTGCCAGCAGCTTAGAATACGAGCAGTACTTC	1	0.0711744
TRBV5-5	TRBJ2-5	TRBC2	CASSLFGGGVAQETQYF	TGTGCCAGCAGCTTGTTTGGAGGGGGCGTTGCCCAAGAGACCCAGTACTTC	1	0.0711744
TRBV5-1	TRBJ1-6	TRBC1	CASSLFGTGDYNSPLHF	TGCGCCAGCAGCTTATTTGGGACAGGAGATTATAATTCACCCCTCCACTTT	1	0.0711744
TRBV18	TRBJ1-2	TRBC1	CASSLGAANYGYTF	TGTGCCAGCTCACTTGGGGCAGCCAACTATGGCTACACCTTC	1	0.0711744
TRBV5-4	TRBJ2-7	TRBC2	CASSLGAGSGGEQYF	TGTGCCAGCAGCTTGGGGGCAGGGTCAGGAGGCGAGCAGTACTTC	1	0.0711744
TRBV13	TRBJ2-2	TRBC2	CASSLGARRITGELFF	TGTGCCAGCAGCTTAGGGGCAAGGCGAATCACCGGGGAGCTGTTTTTT	1	0.0711744
TRBV5-6	TRBJ2-7	TRBC2	CASSLGGADEQYF	TGTGCCAGCAGCTTGGGAGGGGCAGACGAGCAGTACTTC	1	0.0711744
TRBV7-9	TRBJ1-1	TRBC1	CASSLGGGWEAFF	TGTGCCAGCAGCTTAGGCGGGGGGTGGGAAGCTTTCTTT	1	0.0711744
TRBV5-1	TRBJ2-5	TRBC2	CASSLGGLAGALQETQYF	TGCGCCAGCAGCTTGGGCGGACTAGCGGGAGCGCTCCAAGAGACCCAGTACTTC	1	0.0711744
TRBV5-1	TRBJ2-5	TRBC2	CASSLGGYQETQYF	TGCGCCAGCAGTTTAGGGGGATACCAAGAGACCCAGTACTTC	1	0.0711744
TRBV5-4	TRBJ1-1	TRBC1	CASSLGIQYTEAFF	TGTGCCAGCAGCTTGGGAATACAGTACACTGAAGCTTTCTTT	1	0.0711744
TRBV5-1	TRBJ1-6	TRBC1	CASSLGPGNDSPLHF	TGCGCCAGCAGCTTGGGGCCAGGGAACGATTCACCCCTCCACTTT	1	0.0711744
TRBV5-8	TRBJ1-5	TRBC1	CASSLGQASNQPQHF	TGTGCCAGCAGCTTGGGACAGGCGAGCAATCAGCCCCAGCATTTT	1	0.0711744
TRBV5-1	TRBJ1-5	TRBC1	CASSLGQGLNQPQHF	TGCGCCAGCAGCCTTGGACAGGGACTAAATCAGCCCCAGCATTTT	1	0.0711744
TRBV5-1	TRBJ2-7	TRBC2	CASSLGSTSEQYF	TGCGCCAGCAGCTTGGGGTCGACTAGTGAGCAGTACTTC	1	0.0711744
TRBV5-4	TRBJ2-2	TRBC2	CASSLGTGDAGELFF	TGTGCCAGCAGCTTGGGGACAGGGGATGCCGGGGAGCTGTTTTTT	1	0.0711744
TRBV7-9	TRBJ1-4	TRBC1	CASSLGWGGINEKLFF	TGTGCCAGCAGCTTAGGATGGGGCGGGATTAATGAAAAACTGTTTTTT	1	0.0711744
TRBV3-1	TRBJ1-2	TRBC1	CASSLIKGAGSGYTF	TGTGCCAGCAGCCTAATTAAAGGGGCCGGGTCCGGCTACACCTTC	1	0.0711744
TRBV7-9	TRBJ2-1	TRBC2	CASSLLGLAELGPYNEQFF	TGTGCCAGCAGCTTACTGGGACTAGCGGAATTGGGGCCTTACAATGAGCAGTTCTTC	1	0.0711744
TRBV28	TRBJ1-3	TRBC1	CASSLLRSRSGNTIYF	TGTGCCAGCAGTTTACTTCGTTCACGCTCTGGAAACACCATATATTTT	1	0.0711744
TRBV4-2	TRBJ1-2	TRBC1	CASSLLSTGGAYYGYTF	TGTGCCAGCAGCCTACTTTCTACAGGGGGCGCATACTATGGCTACACCTTC	1	0.0711744
TRBV7-3	TRBJ2-7	TRBC2	CASSLMEGDNEQYF	TGTGCCAGCAGCTTAATGGAGGGAGATAACGAGCAGTACTTC	1	0.0711744
TRBV19	TRBJ2-5	TRBC2	CASSLNAGTQETQYF	TGTGCCAGTAGTCTAAACGCGGGTACCCAAGAGACCCAGTACTTC	1	0.0711744
TRBV5-1	TRBJ2-7	TRBC2	CASSLNSGAYEQYF	TGCGCCAGCAGCTTGAACTCAGGGGCCTACGAGCAGTACTTC	1	0.0711744
TRBV12-4	TRBJ2-1	TRBC2	CASSLPAGANEQFF	TGTGCCAGCAGTTTACCAGCGGGGGCCAATGAGCAGTTCTTC	1	0.0711744
TRBV28	TRBJ2-7	TRBC2	CASSLPGEPGSYEQYF	TGTGCCAGCAGTCTGCCCGGGGAACCCGGCTCCTACGAGCAGTACTTC	1	0.0711744
TRBV7-3	TRBJ1-1	TRBC1	CASSLQGNTEAFF	TGTGCCAGCAGCTTGCAGGGGAACACTGAAGCTTTCTTT	1	0.0711744
TRBV18	TRBJ1-1	TRBC1	CASSLQMSPEAFF	TGTGCCAGCTCACTACAGATGAGCCCTGAAGCTTTCTTT	1	0.0711744
TRBV7-2	TRBJ1-1	TRBC1	CASSLQRRQGFTEAFF	TGTGCCAGCAGCTTGCAAAGAAGACAGGGATTCACTGAAGCTTTCTTT	1	0.0711744
TRBV5-1	TRBJ1-2		CASSLRAGGQGYGYTF	TGCGCCAGCAGCTTGAGGGCCGGGGGACAGGGCTATGGCTACACCTTC	1	0.0711744
TRBV7-2	TRBJ2-1	TRBC2	CASSLRGQPLGDEQFF	TGTGCCAGCAGCTTGAGGGGACAGCCTTTGGGGGATGAGCAGTTCTTC	1	0.0711744
TRBV5-1	TRBJ2-3	TRBC2	CASSLRGSASTDTQYF	TGCGCCAGCAGCTTGCGCGGGAGTGCGAGCACAGATACGCAGTATTTT	1	0.0711744
TRBV7-6	TRBJ2-1	TRBC2	CASSLRPPGRERVRNEQFF	TGTGCCAGCAGCTTAAGGCCCCCCGGGCGGGAGAGAGTGAGGAATGAGCAGTTCTTC	1	0.0711744
TRBV11-2	TRBJ2-7	TRBC2	CASSLRQGPYEQYF	TGTGCCAGCAGCTTAAGGCAGGGACCCTACGAGCAGTACTTC	1	0.0711744
TRBV28	TRBJ1-2	TRBC1	CASSLRQNPYGYTF	TGTGCCAGCAGCCTGCGACAGAACCCCTATGGCTACACCTTC	1	0.0711744
TRBV7-2	TRBJ2-3	TRBC2	CASSLRRDSTDTQYF	TGTGCCAGCAGCTTACGGAGAGACAGCACAGATACGCAGTATTTT	1	0.0711744
TRBV11-2	TRBJ1-1	TRBC1	CASSLSGRRTEAFF	TGTGCCAGCAGCTTATCAGGGCGTAGGACTGAAGCTTTCTTT	1	0.0711744
TRBV5-1	TRBJ2-7	TRBC2	CASSLSGVGAEQYF	TGCGCCAGCAGCCTAAGCGGGGTTGGGGCCGAGCAGTACTTC	1	0.0711744
TRBV5-1	TRBJ1-1	TRBC1	CASSLSRMGDTEAFF	TGCGCCAGCAGCTTATCACGAATGGGGGACACTGAAGCTTTCTTT	1	0.0711744
TRBV5-4	TRBJ2-3	TRBC2	CASSLSTDTQYF	TGTGCCAGCAGCTTAAGCACAGATACGCAGTATTTT	1	0.0711744
TRBV3-1	TRBJ2-4	TRBC2	CASSLSVGYGAKNIQYF	TGTGCCAGCAGCCTGAGTGTGGGGTACGGGGCCAAAAACATTCAGTACTTC	1	0.0711744
TRBV11-3	TRBJ2-3	TRBC2	CASSLTDTQYF	TGTGCCAGCAGCTTAACAGATACGCAGTATTTT	1	0.0711744
TRBV7-2	TRBJ2-1	TRBC2	CASSLTSGVHNEQFF	TGTGCCAGCAGCTTAACTAGCGGGGTTCACAATGAGCAGTTCTTC	1	0.0711744
TRBV5-1	TRBJ1-2	TRBC1	CASSLVAYGYTF	TGCGCCAGCAGCTTGGTTGCCTATGGCTACACCTTC	1	0.0711744
TRBV11-2	TRBJ2-2	TRBC2	CASSLVGGGLAGTGELFF	TGTGCCAGCAGCTTGGTGGGAGGGGGACTAGCGGGAACCGGGGAGCTGTTTTTT	1	0.0711744
TRBV5-1	TRBJ2-1	TRBC2	CASSLVLGLAGVVNEQFF	TGCGCCAGCAGCTTGGTCTTAGGACTAGCGGGAGTTGTCAATGAGCAGTTCTTC	1	0.0711744
TRBV28	TRBJ2-3	TRBC2	CASSLVRWAQYF	TGTGCCAGCAGCCTAGTTAGGTGGGCGCAGTATTTT	1	0.0711744
TRBV5-6	TRBJ2-3	TRBC2	CASSLVTSGYTDTQYF	TGTGCCAGCAGCTTGGTGACTAGCGGGTACACAGATACGCAGTATTTT	1	0.0711744
TRBV7-8	TRBJ1-2	TRBC1	CASSLYFVQGAGYGYTF	TGTGCCAGCAGCTTATATTTTGTACAGGGGGCTGGGTATGGCTACACCTTC	1	0.0711744
TRBV7-6	TRBJ2-7	TRBC2	CASSNEADSSYEQYF	TGTGCCAGCAGTAATGAAGCAGATAGCTCCTACGAGCAGTACTTC	1	0.0711744
TRBV6-2	TRBJ2-5	TRBC2	CASSNHPGVATQYF	TGTGCCAGCAGCAACCACCCGGGAGTTGCGACCCAGTACTTC	1	0.0711744
TRBV13	TRBJ1-1	TRBC1	CASSNQGRAAEAFF	TGTGCCAGCAGCAACCAGGGAAGGGCGGCTGAAGCTTTCTTT	1	0.0711744
TRBV18	TRBJ2-1	TRBC2	CASSNRGAGGSYNEQFF	TGTGCCAGCTCAAACCGGGGGGCGGGAGGCTCCTACAATGAGCAGTTCTTC	1	0.0711744
TRBV5-4	TRBJ2-1	TRBC2	CASSPDRENEQFF	TGTGCCAGCAGCCCGGACAGGGAGAATGAGCAGTTCTTC	1	0.0711744
TRBV6-4	TRBJ2-1	TRBC2	CASSPDRNEQFF	TGTGCCAGCAGTCCTGATCGTAATGAGCAGTTCTTC	1	0.0711744
TRBV18	TRBJ1-2	TRBC1	CASSPERGPSFYGYTF	TGTGCCAGCTCACCAGAAAGAGGCCCGTCATTCTATGGCTACACCTTC	1	0.0711744
TRBV5-5	TRBJ1-5	TRBC1	CASSPGASGHQPQHF	TGTGCCAGCAGCCCCGGGGCCAGCGGGCATCAGCCCCAGCATTTT	1	0.0711744
TRBV18	TRBJ2-3	TRBC2	CASSPGIGSTDTQYF	TGTGCCAGCTCCCCGGGGATCGGGAGTACGGATACGCAGTATTTT	1	0.0711744
TRBV6-2	TRBJ1-6	TRBC1	CASSPGQGSSPLHF	TGTGCCAGCAGTCCGGGACAGGGGAGCTCACCCCTCCACTTT	1	0.0711744
TRBV6-6	TRBJ2-7	TRBC2	CASSPGTGAYEQYF	TGTGCCAGCAGCCCCGGGACAGGGGCCTACGAGCAGTACTTC	1	0.0711744
TRBV5-1	TRBJ1-1	TRBC1	CASSPGTVGRMNTEAFF	TGCGCCAGCAGCCCCGGAACGGTGGGGAGGATGAACACTGAAGCTTTCTTT	1	0.0711744
TRBV3-1	TRBJ2-6	TRBC2	CASSPIILPGANVLTF	TGTGCCAGCAGCCCCATTATACTCCCAGGGGCCAACGTCCTGACTTTC	1	0.0711744
TRBV5-8	TRBJ1-2	TRBC1	CASSPIPGQGQGYTF	TGTGCCAGCAGCCCCATCCCGGGACAGGGGCAAGGCTACACCTTC	1	0.0711744
TRBV12-3	TRBJ2-2	TRBC2	CASSPIPTGELFF	TGTGCCAGCAGCCCCATTCCCACCGGGGAGCTGTTTTTT	1	0.0711744
TRBV27	TRBJ1-4	TRBC1	CASSPPGIGEILFF	TGTGCCAGCAGTCCGCCCGGGATTGGGGAGATACTGTTTTTT	1	0.0711744
TRBV18	TRBJ2-7	TRBC2	CASSPPPMDEQYF	TGTGCCAGCTCACCACCCCCCATGGACGAGCAGTACTTC	1	0.0711744
TRBV4-1	TRBJ1-3	TRBC1	CASSPQGEGVTGNTIYF	TGCGCCAGCAGCCCACAGGGAGAAGGAGTTACTGGAAACACCATATATTTT	1	0.0711744
TRBV9	TRBJ2-7	TRBC2	CASSPRASEVEQYF	TGTGCCAGCAGCCCCCGCGCCTCTGAGGTCGAGCAGTACTTC	1	0.0711744
TRBV18	TRBJ2-3	TRBC2	CASSPRTGGTDTQYF	TGTGCCAGCTCACCAAGGACAGGGGGCACAGATACGCAGTATTTT	1	0.0711744
TRBV10-1	TRBJ2-7	TRBC2	CASSPSAGAYEQYF	TGCGCCAGCAGCCCATCTGCGGGGGCCTACGAGCAGTACTTC	1	0.0711744
TRBV28	TRBJ2-5	TRBC2	CASSPSGEIPHQETQYF	TGTGCCAGCAGCCCATCGGGGGAGATACCACACCAAGAGACCCAGTACTTC	1	0.0711744
TRBV13	TRBJ2-7	TRBC2	CASSPTEGSGSRYEQYF	TGTGCCAGCAGCCCGACTGAGGGTAGCGGGAGTAGGTACGAGCAGTACTTC	1	0.0711744
TRBV11-2	TRBJ1-1	TRBC1	CASSPTGRGRAFF	TGTGCCAGCAGCCCGACAGGGAGGGGGAGAGCTTTCTTT	1	0.0711744
TRBV14	TRBJ2-3	TRBC2	CASSPTRQGASADTQYF	TGTGCCAGCAGCCCAACACGGCAGGGGGCGTCTGCAGATACGCAGTATTTT	1	0.0711744
TRBV6-2	TRBJ1-2	TRBC1	CASSPVLGRSLYGYTF	TGTGCCAGCAGTCCCGTATTGGGGAGATCACTCTATGGCTACACCTTC	1	0.0711744
TRBV3-1	TRBJ1-2	TRBC1	CASSQAMYGYTF	TGTGCCAGCAGCCAAGCGATGTATGGCTACACCTTC	1	0.0711744
TRBV4-1	TRBJ1-4	TRBC1	CASSQAPSGTGDEKLFF	TGCGCCAGCAGCCAAGCTCCCTCCGGGACAGGGGATGAAAAACTGTTTTTT	1	0.0711744
TRBV4-1	TRBJ2-5	TRBC2	CASSQDGTTQETQYF	TGCGCCAGCAGCCAAGATGGGACAACGCAAGAGACCCAGTACTTC	1	0.0711744
TRBV3-1	TRBJ1-2	TRBC1	CASSQDIYGYTF	TGTGCCAGCAGCCAAGACATCTATGGCTACACCTTC	1	0.0711744
TRBV4-1	TRBJ2-2	TRBC2	CASSQDNRGGAWTGELFF	TGCGCCAGCAGCCAAGATAATCGGGGGGGCGCTTGGACCGGGGAGCTGTTTTTT	1	0.0711744
TRBV4-1	TRBJ1-6	TRBC1	CASSQDRDRSENSPLHF	TGCGCCAGCAGCCAAGATCGGGACAGGTCTGAGAATTCACCCCTCCACTTT	1	0.0711744
TRBV3-1	TRBJ2-7	TRBC2	CASSQDRTGGDYEQYF	TGTGCCAGCAGCCAAGACCGGACAGGGGGAGATTACGAGCAGTACTTC	1	0.0711744
TRBV4-1	TRBJ1-2	TRBC1	CASSQERRYGYTF	TGCGCCAGCAGCCAAGAGCGAAGATATGGCTACACCTTC	1	0.0711744
TRBV14	TRBJ2-1	TRBC2	CASSQESSGSVMFF	TGTGCCAGCAGCCAAGAGAGTAGCGGGAGTGTAATGTTCTTC	1	0.0711744
TRBV4-1	TRBJ1-1	TRBC1	CASSQGGGLDTEAFF	TGCGCCAGCAGCCAAGGCGGAGGACTAGACACTGAAGCTTTCTTT	1	0.0711744
TRBV3-1	TRBJ2-2	TRBC2	CASSQGHTGELFF	TGTGCCAGCAGCCAAGGGCACACCGGGGAGCTGTTTTTT	1	0.0711744
TRBV2	TRBJ2-3	TRBC2	CASSQGLAGGEDTQYF	TGTGCCAGCAGTCAAGGACTAGCGGGGGGGGAAGATACGCAGTATTTT	1	0.0711744
TRBV7-9	TRBJ2-1	TRBC2	CASSQGMTRGAYNEQFF	TGTGCCAGCAGCCAGGGTATGACTAGAGGGGCCTACAATGAGCAGTTCTTC	1	0.0711744
TRBV14	TRBJ2-7	TRBC2	CASSQGPTPYEQYF	TGTGCCAGCAGTCAGGGTCCGACACCCTACGAGCAGTACTTC	1	0.0711744
TRBV14	TRBJ2-4	TRBC2	CASSQGPWIQYF	TGTGCCAGCAGCCAAGGACCTTGGATTCAGTACTTC	1	0.0711744
TRBV18	TRBJ2-1	TRBC2	CASSQGQDSYNEQFF	TGTGCCAGCTCACAGGGACAGGACTCCTACAATGAGCAGTTCTTC	1	0.0711744
TRBV4-1	TRBJ2-1	TRBC2	CASSQGQGYNEQFF	TGCGCCAGCAGCCAAGGACAGGGCTACAATGAGCAGTTCTTC	1	0.0711744
TRBV4-1	TRBJ1-1	TRBC1	CASSQGRGGTEAFF	TGCGCCAGCAGCCAAGGTCGAGGGGGGACTGAAGCTTTCTTT	1	0.0711744
TRBV3-1	TRBJ2-7	TRBC2	CASSQGRGQSYEQYF	TGTGCCAGCAGCCAAGGGCGAGGACAGAGCTACGAGCAGTACTTC	1	0.0711744
TRBV4-2	TRBJ2-5	TRBC2	CASSQGRGRETQYF	TGTGCCAGCAGCCAGGGCAGGGGGCGGGAGACCCAGTACTTC	1	0.0711744
TRBV11-2	TRBJ2-3	TRBC2	CASSQGRWLSADTQYF	TGTGCCAGCAGCCAGGGACGTTGGCTCTCCGCAGATACGCAGTATTTT	1	0.0711744
TRBV3-1	TRBJ2-1	TRBC2	CASSQNSGRPYNEQFF	TGTGCCAGCAGCCAGAATAGCGGGAGGCCCTACAATGAGCAGTTCTTC	1	0.0711744
TRBV14	TRBJ2-1	TRBC2	CASSQRLGLAGWSSYNEQFF	TGTGCCAGCAGCCAAAGGTTGGGACTAGCGGGGTGGAGCTCCTACAATGAGCAGTTCTTC	1	0.0711744
TRBV4-1	TRBJ2-1	TRBC2	CASSQRRLAGGYEQFF	TGCGCCAGCAGCCAACGACGACTAGCGGGAGGATATGAGCAGTTCTTC	1	0.0711744
TRBV3-1	TRBJ2-1	TRBC2	CASSQVLGGSSSYNEQFF	TGTGCCAGCAGCCAAGTGTTGGGGGGTTCAAGCTCCTACAATGAGCAGTTCTTC	1	0.0711744
TRBV9	TRBJ2-1	TRBC2	CASSRAGEWNEQFF	TGTGCCAGCAGCCGAGCGGGAGAATGGAATGAGCAGTTCTTC	1	0.0711744
TRBV5-1	TRBJ2-7	TRBC2	CASSREVSGADEQYF	TGCGCCAGCAGCCGGGAGGTTAGCGGGGCGGACGAGCAGTACTTC	1	0.0711744
TRBV7-9	TRBJ1-2	TRBC1	CASSRFGGVPTYGYTF	TGTGCCAGCAGCCGGTTTGGGGGGGTGCCTACCTATGGCTACACCTTC	1	0.0711744
TRBV2	TRBJ1-5	TRBC1	CASSRGADLGPQHF	TGTGCCAGCAGTCGGGGGGCCGACCTCGGGCCCCAGCATTTT	1	0.0711744
TRBV28	TRBJ2-3	TRBC2	CASSRGDGTSGTDTQYF	TGTGCCAGCAGTCGCGGAGACGGGACTAGCGGCACAGATACGCAGTATTTT	1	0.0711744
TRBV5-6	TRBJ2-3	TRBC2	CASSRISTDTQYF	TGTGCCAGCAGCAGAATTAGCACAGATACGCAGTATTTT	1	0.0711744
TRBV13	TRBJ2-7	TRBC2	CASSRLVQREDEQYF	TGTGCCAGCAGCCGCCTCGTACAGCGGGAGGACGAGCAGTACTTC	1	0.0711744
TRBV5-1	TRBJ2-2	TRBC2	CASSRNTGELFF	TGCGCCAGCAGCAGGAACACCGGGGAGCTGTTTTTT	1	0.0711744
TRBV7-6	TRBJ2-1	TRBC2	CASSRSGNPYNEQFF	TGTGCCAGCAGCCGTAGCGGGAACCCCTACAATGAGCAGTTCTTC	1	0.0711744
TRBV28	TRBJ2-7	TRBC2	CASSRSGRYEQYF	TGTGCCAGCAGTCGGTCGGGGAGATACGAGCAGTACTTC	1	0.0711744
TRBV18	TRBJ2-5	TRBC2	CASSRSQSGQETQYF	TGTGCCAGCTCGCGGAGTCAGAGCGGTCAAGAGACCCAGTACTTC	1	0.0711744
TRBV3-1	TRBJ2-3	TRBC2	CASSRSSLTRTDTQYF	TGTGCCAGCAGTCGATCCTCGTTGACTCGCACAGATACGCAGTATTTT	1	0.0711744
TRBV19	TRBJ1-1	TRBC1	CASSRTGARTEAFF	TGTGCCAGTAGTAGGACAGGGGCGAGGACTGAAGCTTTCTTT	1	0.0711744
TRBV28	TRBJ1-6	TRBC1	CASSRTGGFSPLHF	TGTGCCAGCAGCAGGACAGGGGGCTTTTCACCCCTCCACTTT	1	0.0711744
TRBV6-5	TRBJ2-1	TRBC2	CASSRTGTTNPHEQFF	TGTGCCAGCAGCCGTACCGGGACCACAAACCCCCATGAGCAGTTCTTC	1	0.0711744
TRBV5-4	TRBJ1-5	TRBC1	CASSRTPTETQPQHF	TGTGCCAGCAGCAGAACCCCGACAGAAACCCAGCCCCAGCATTTT	1	0.0711744
TRBV5-1	TRBJ2-7	TRBC2	CASSSADTYEQYF	TGCGCCAGCAGTTCAGCGGATACCTACGAGCAGTACTTC	1	0.0711744
TRBV28	TRBJ2-7	TRBC2	CASSSATGSYEQYF	TGTGCCAGCAGTTCCGCGACAGGGTCCTACGAGCAGTACTTC	1	0.0711744
TRBV9	TRBJ1-3	TRBC1	CASSSDGSSGNTIYF	TGTGCCAGCAGCTCGGACGGTAGCTCTGGAAACACCATATATTTT	1	0.0711744
TRBV28	TRBJ2-1	TRBC2	CASSSDSTHNEQFF	TGTGCCAGCAGTTCGGACTCAACCCACAATGAGCAGTTCTTC	1	0.0711744
TRBV7-2	TRBJ2-3	TRBC2	CASSSESGTSGRNTQYF	TGTGCCAGCAGCTCGGAGTCCGGGACTAGCGGGAGAAATACGCAGTATTTT	1	0.0711744
TRBV9	TRBJ2-1	TRBC2	CASSSFGLAEYNEQFF	TGTGCCAGCAGCTCATTCGGACTAGCGGAGTACAATGAGCAGTTCTTC	1	0.0711744
TRBV11-3	TRBJ2-1	TRBC2	CASSSGLAGGSDEQFF	TGTGCCAGCAGCTCAGGACTAGCGGGAGGGTCGGATGAGCAGTTCTTC	1	0.0711744
TRBV13	TRBJ2-7	TRBC2	CASSSGLAGNYEQYF	TGTGCCAGCAGCTCAGGACTAGCGGGGAACTACGAGCAGTACTTC	1	0.0711744
TRBV27	TRBJ2-1	TRBC2	CASSSGLASGNEQFF	TGTGCCAGCAGTTCCGGACTAGCCTCGGGGAATGAGCAGTTCTTC	1	0.0711744
TRBV27	TRBJ2-5	TRBC2	CASSSGSPVETQYF	TGTGCCAGCAGTTCCGGATCCCCTGTTGAGACCCAGTACTTC	1	0.0711744
TRBV7-6	TRBJ2-7	TRBC2	CASSSGTGIDEQYF	TGTGCCAGCAGCTCCGGGACAGGGATTGACGAGCAGTACTTC	1	0.0711744
TRBV5-5	TRBJ2-5	TRBC2	CASSSGTSGRASETQYF	TGTGCCAGCAGTTCTGGGACTAGCGGGAGGGCTAGTGAGACCCAGTACTTC	1	0.0711744
TRBV11-2	TRBJ2-3	TRBC2	CASSSHAVMADTQYF	TGTGCCAGCAGCTCTCATGCAGTGATGGCAGATACGCAGTATTTT	1	0.0711744
TRBV5-1	TRBJ1-1	TRBC1	CASSSHDGMNTEAFF	TGCGCCAGCAGCTCGCATGACGGGATGAACACTGAAGCTTTCTTT	1	0.0711744
TRBV5-1	TRBJ2-1	TRBC2	CASSSIAGADYNEQFF	TGCGCCAGCAGCTCCATAGCGGGAGCAGATTACAATGAGCAGTTCTTC	1	0.0711744
TRBV5-1	TRBJ2-1	TRBC2	CASSSLADREQFF	TGCGCCAGCAGTTCCCTGGCGGACCGGGAGCAGTTCTTC	1	0.0711744
TRBV27	TRBJ2-7	TRBC2	CASSSLAGVKLSYEQYF	TGTGCCAGCAGTTCTCTAGCGGGGGTGAAACTCTCCTACGAGCAGTACTTC	1	0.0711744
TRBV7-9	TRBJ2-7	TRBC2	CASSSLLGRGPYEQYF	TGTGCCAGCAGCTCCCTTTTGGGCAGGGGGCCCTACGAGCAGTACTTC	1	0.0711744
TRBV7-8	TRBJ2-6	TRBC2	CASSSLRQTFSGANVLTF	TGTGCCAGCAGCTCCCTGAGGCAGACCTTCTCTGGGGCCAACGTCCTGACTTTC	1	0.0711744
TRBV7-9	TRBJ1-2	TRBC1	CASSSNRGDYGYTF	TGTGCCAGCAGCTCTAACAGGGGGGACTATGGCTACACCTTC	1	0.0711744
TRBV12-4	TRBJ2-1	TRBC2	CASSSPWDLQFKGNEQFF	TGTGCCAGCAGTTCACCATGGGACCTTCAATTCAAGGGGAATGAGCAGTTCTTC	1	0.0711744
TRBV5-4	TRBJ2-5	TRBC2	CASSSQSLETQYF	TGTGCCAGCAGCTCCCAGTCGCTCGAGACCCAGTACTTC	1	0.0711744
TRBV5-8	TRBJ1-2	TRBC1	CASSSRQGIYGYTF	TGTGCCAGCAGCTCCCGACAGGGAATCTATGGCTACACCTTC	1	0.0711744
TRBV9	TRBJ2-3	TRBC2	CASSSRSGASDDTQYF	TGTGCCAGCAGCTCCCGATCGGGAGCTTCCGATGATACGCAGTATTTT	1	0.0711744
TRBV7-6	TRBJ2-3	TRBC2	CASSSRTPDTQYF	TGTGCCAGCAGCAGCAGGACCCCAGATACGCAGTATTTT	1	0.0711744
TRBV7-8	TRBJ2-5	TRBC2	CASSSRTSGIKETQYF	TGTGCCAGCAGCAGCAGGACTAGCGGTATAAAAGAGACCCAGTACTTC	1	0.0711744
TRBV28	TRBJ1-2	TRBC1	CASSSSGAIYGYTF	TGTGCCAGCAGTTCTTCAGGGGCGATCTATGGCTACACCTTC	1	0.0711744
TRBV6-6	TRBJ2-1	TRBC2	CASSSSGRDNEQFF	TGTGCCAGCAGTTCTAGCGGGAGGGACAATGAGCAGTTCTTC	1	0.0711744
TRBV11-2	TRBJ1-4	TRBC1	CASSSSSGHAAKLFF	TGTGCCAGCAGCTCTTCCTCGGGACATGCAGCAAAACTGTTTTTT	1	0.0711744
TRBV28	TRBJ2-7	TRBC2	CASSSTPGTGGSSYEQYF	TGTGCCAGCAGTTCTACCCCCGGGACAGGGGGTAGCTCCTACGAGCAGTACTTC	1	0.0711744
TRBV5-1	TRBJ2-3	TRBC2	CASSSWQGRGISTDTQYF	TGCGCCAGCAGCTCTTGGCAAGGTCGGGGGATAAGCACAGATACGCAGTATTTT	1	0.0711744
TRBV5-1	TRBJ1-2	TRBC1	CASSTEGRNGYTF	TGCGCCAGCTCCACGGAGGGCAGGAATGGCTACACCTTC	1	0.0711744
TRBV2	TRBJ2-7	TRBC2	CASSTFSGTRPYEQYF	TGTGCCAGCAGTACGTTCTCCGGGACTAGACCCTACGAGCAGTACTTC	1	0.0711744
TRBV5-1	TRBJ2-3	TRBC2	CASSTGLTDTQYF	TGCGCCAGCAGCACGGGACTCACAGATACGCAGTATTTT	1	0.0711744
TRBV19	TRBJ2-7	TRBC2	CASSTMDEQYF	TGTGCCAGTAGTACGATGGACGAGCAGTACTTC	1	0.0711744
TRBV5-1	TRBJ1-1	TRBC1	CASSTSGGDSTEAFF	TGCGCCAGCAGCACTTCAGGGGGTGATAGCACTGAAGCTTTCTTT	1	0.0711744
TRBV19	TRBJ1-5	TRBC1	CASSTSRNQPQHF	TGTGCCAGTAGTACCTCCCGGAATCAGCCCCAGCATTTT	1	0.0711744
TRBV5-1	TRBJ2-7	TRBC2	CASSTTVNSYEQYF	TGCGCCAGCAGCACGACAGTCAACTCCTACGAGCAGTACTTC	1	0.0711744
TRBV9	TRBJ1-2	TRBC1	CASSVAGDRDGYTF	TGTGCCAGCAGCGTAGCGGGGGACCGTGATGGCTACACCTTC	1	0.0711744
TRBV9	TRBJ2-7	TRBC2	CASSVDGRSSYEQYF	TGTGCCAGCAGCGTAGACGGCCGCAGCTCCTACGAGCAGTACTTC	1	0.0711744
TRBV6-1	TRBJ1-2	TRBC1	CASSVDLSYGYTF	TGTGCCAGCAGTGTAGATTTGTCCTATGGCTACACCTTC	1	0.0711744
TRBV9	TRBJ1-6	TRBC1	CASSVEEHFNSPLHF	TGTGCCAGCAGCGTAGAAGAACACTTTAATTCACCCCTCCACTTT	1	0.0711744
TRBV9	TRBJ1-4	TRBC1	CASSVETGEKLFF	TGTGCCAGCAGCGTAGAAACGGGTGAAAAACTGTTTTTT	1	0.0711744
TRBV9	TRBJ2-1	TRBC2	CASSVGNYEQFF	TGTGCCAGCAGCGTTGGAAACTATGAGCAGTTCTTC	1	0.0711744
TRBV9	TRBJ2-5	TRBC2	CASSVGRSVGETQYF	TGTGCCAGCAGCGTAGGGCGTAGTGTCGGGGAGACCCAGTACTTC	1	0.0711744
TRBV3-1	TRBJ2-5	TRBC2	CASSVRGLQETQYF	TGTGCCAGCAGCGTGCGGGGCCTCCAAGAGACCCAGTACTTC	1	0.0711744
TRBV6-1	TRBJ2-2	TRBC2	CASSVRQGTGELFF	TGTGCCAGCAGTGTCCGACAGGGGACCGGGGAGCTGTTTTTT	1	0.0711744
TRBV2	TRBJ2-1	TRBC2	CASSVSARLAGYNEQFF	TGTGCCAGCAGTGTGTCGGCTCGGCTAGCGGGATACAATGAGCAGTTCTTC	1	0.0711744
TRBV9	TRBJ2-1	TRBC2	CASSVSSGKNEQFF	TGTGCCAGCAGCGTGTCTAGCGGGAAGAATGAGCAGTTCTTC	1	0.0711744
TRBV28	TRBJ1-5	TRBC1	CASSWDGSNQPQHF	TGTGCCAGCAGTTGGGACGGTAGCAATCAGCCCCAGCATTTT	1	0.0711744
TRBV5-1	TRBJ2-5	TRBC2	CASSWGTSGGETQYF	TGCGCCAGCAGCTGGGGGACTAGCGGGGGCGAGACCCAGTACTTC	1	0.0711744
TRBV13	TRBJ2-7	TRBC2	CASSWRDFPLEQYF	TGTGCCAGCAGCTGGCGGGACTTCCCCCTGGAGCAGTACTTC	1	0.0711744
TRBV6-2	TRBJ2-6	TRBC2	CASSYDQGSGANVLTF	TGTGCCAGCAGTTACGATCAGGGTTCAGGGGCCAACGTCCTGACTTTC	1	0.0711744
TRBV6-6	TRBJ1-2	TRBC1	CASSYGSTGHGYTF	TGTGCCAGCAGTTACGGTAGCACTGGTCATGGCTACACCTTC	1	0.0711744
TRBV6-6	TRBJ1-6	TRBC1	CASSYGTGNSPLHF	TGTGCCAGCAGTTACGGGACAGGGAATTCACCCCTCCACTTT	1	0.0711744
TRBV6-6	TRBJ2-7	TRBC2	CASSYLGTGASHEQYF	TGTGCCAGCAGTTACCTCGGGACAGGGGCATCCCACGAGCAGTACTTC	1	0.0711744
TRBV6-5	TRBJ1-2	TRBC1	CASSYNGGPYGYTF	TGTGCCAGCAGTTATAACGGGGGGCCCTATGGCTACACCTTC	1	0.0711744
TRBV5-6	TRBJ2-1	TRBC2	CASSYRDRGLVEQFF	TGTGCCAGCAGCTACCGGGACAGGGGGCTCGTTGAGCAGTTCTTC	1	0.0711744
TRBV6-5	TRBJ2-5	TRBC2	CASSYSGGAGGSVETQYF	TGTGCCAGCAGTTACTCTGGAGGGGCAGGGGGCTCGGTAGAGACCCAGTACTTC	1	0.0711744
TRBV6-6	TRBJ1-4	TRBC1	CASSYSPANAYEKLFF	TGTGCCAGCAGTTACTCGCCTGCGAATGCCTATGAAAAACTGTTTTTT	1	0.0711744
TRBV6-2	TRBJ2-1	TRBC2	CASSYSREAGYNEQFF	TGTGCCAGCAGTTACTCCCGGGAGGCGGGATACAATGAGCAGTTCTTC	1	0.0711744
TRBV6-6	TRBJ1-2	TRBC1	CASSYTASETGYTF	TGTGCCAGCAGTTACACTGCCTCGGAGACTGGCTACACCTTC	1	0.0711744
TRBV11-3	TRBJ2-5	TRBC2	CASSYYPQETQYF	TGTGCCAGCAGCTACTACCCACAAGAGACCCAGTACTTC	1	0.0711744
TRBV6-6	TRBJ2-1	TRBC2	CASSYYRGDEQFF	TGTGCCAGCAGTTACTACCGGGGTGATGAGCAGTTCTTC	1	0.0711744
TRBV14	TRBJ2-2	TRBC2	CASTGLRNTGELFF	TGTGCCAGCACCGGACTCCGGAACACCGGGGAGCTGTTTTTT	1	0.0711744
TRBV19	TRBJ1-2	TRBC1	CASTLGGPVGYTF	TGTGCCAGTACCCTGGGGGGACCGGTCGGCTACACCTTC	1	0.0711744
TRBV6-1	TRBJ2-2	TRBC2	CASTLGTSASGELFF	TGTGCCAGCACATTAGGGACTAGCGCCAGCGGGGAGCTGTTTTTT	1	0.0711744
TRBV28	TRBJ1-3	TRBC1	CASTLRDRELGNTIYF	TGTGCCAGCACGTTGCGGGACCGAGAGTTAGGAAACACCATATATTTT	1	0.0711744
TRBV12-3	TRBJ1-2	TRBC1	CASTPGRFSIYGYTF	TGTGCCAGCACCCCCGGAAGATTCTCCATCTATGGCTACACCTTC	1	0.0711744
TRBV6-1	TRBJ2-5	TRBC2	CASTPTRGRETQYF	TGTGCCAGCACTCCTACGAGGGGGCGAGAGACCCAGTACTTC	1	0.0711744
TRBV5-1	TRBJ1-2	TRBC1	CASTQSWDLRAGYTF	TGCGCCAGCACGCAAAGTTGGGACCTCCGGGCTGGCTACACCTTC	1	0.0711744
TRBV5-1	TRBJ2-2	TRBC2	CASTRALNTGELFF	TGCGCCAGCACCAGGGCCCTAAACACCGGGGAGCTGTTTTTT	1	0.0711744
TRBV19	TRBJ2-1	TRBC2	CASTSGQGASDEQFF	TGTGCCAGTACCTCGGGACAGGGGGCTTCGGATGAGCAGTTCTTC	1	0.0711744
TRBV6-1	TRBJ2-1	TRBC2	CASTSQGYNEQFF	TGTGCCAGCACCTCCCAAGGGTACAATGAGCAGTTCTTC	1	0.0711744
TRBV4-1	TRBJ2-2	TRBC2	CASTTKGAGTGELFF	TGCGCCAGCACTACGAAGGGGGCTGGGACCGGGGAGCTGTTTTTT	1	0.0711744
TRBV2	TRBJ2-7	TRBC2	CASTVGTGTPNKEQYF	TGTGCCAGCACTGTCGGTACCGGGACACCAAACAAGGAGCAGTACTTC	1	0.0711744
TRBV2	TRBJ2-3	TRBC2	CASVGLAGVGDTQYF	TGTGCCAGCGTTGGACTAGCGGGAGTGGGGGATACGCAGTATTTT	1	0.0711744
TRBV6-5	TRBJ2-2	TRBC2	CASVGQGRAGELFF	TGTGCCAGCGTGGGACAGGGGAGGGCCGGGGAGCTGTTTTTT	1	0.0711744
TRBV24-1	TRBJ2-1	TRBC2	CATGRRGDSNEQFF	TGTGCCACCGGGCGAAGAGGGGACTCAAATGAGCAGTTCTTC	1	0.0711744
TRBV7-8	TRBJ2-5	TRBC2	CATRGDLEYF	TGTGCCACCCGGGGGGACCTTGAGTACTTC	1	0.0711744
TRBV24-1	TRBJ2-1	TRBC2	CATSAPTSSSYNEQFF	TGTGCCACCAGTGCCCCCACATCAAGCTCCTACAATGAGCAGTTCTTC	1	0.0711744
TRBV24-1	TRBJ2-7	TRBC2	CATSDPAQGAYEQYF	TGTGCCACCAGTGACCCCGCGCAGGGCGCCTACGAGCAGTACTTC	1	0.0711744
TRBV24-1	TRBJ1-1	TRBC1	CATSDSGMNTEAFF	TGTGCCACCAGTGATTCAGGGATGAACACTGAAGCTTTCTTT	1	0.0711744
TRBV24-1	TRBJ2-3	TRBC2	CATSEGWRKGRDTQYF	TGTGCCACCAGTGAGGGATGGAGGAAGGGCCGGGATACGCAGTATTTT	1	0.0711744
TRBV24-1	TRBJ2-1	TRBC2	CATSGTEPSSYNEQFF	TGTGCCACCAGTGGGACAGAGCCTAGCTCCTACAATGAGCAGTTCTTC	1	0.0711744
TRBV15	TRBJ1-2	TRBC1	CATSRAGTLYGYTF	TGTGCCACCAGCAGAGCCGGGACCCTCTATGGCTACACCTTC	1	0.0711744
TRBV15	TRBJ2-1	TRBC2	CATSRDLTAVEQFF	TGTGCCACCAGCAGAGATCTTACGGCAGTAGAGCAGTTCTTC	1	0.0711744
TRBV15	TRBJ2-3	TRBC2	CATSRGPGLSSGLEDTQYF	TGTGCCACCAGCAGGGGACCGGGACTATCTAGCGGGCTAGAGGATACGCAGTATTTT	1	0.0711744
TRBV5-1	TRBJ2-1	TRBC2	CATSRGPGYNEQFF	TGCGCCACCTCTAGAGGACCCGGTTACAATGAGCAGTTCTTC	1	0.0711744
TRBV15	TRBJ1-5	TRBC1	CATSRVTGGSNQPQHF	TGTGCCACCAGCAGAGTAACAGGGGGAAGCAATCAGCCCCAGCATTTT	1	0.0711744
TRBV15	TRBJ2-5	TRBC2	CATSSGGQETQYF	TGTGCCACCAGCAGCGGCGGCCAAGAGACCCAGTACTTC	1	0.0711744
TRBV24-1	TRBJ2-5	TRBC2	CATSVGEGPPEETQYF	TGTGCCACCAGTGTGGGGGAGGGCCCTCCAGAGGAGACCCAGTACTTC	1	0.0711744
TRBV30	TRBJ1-6	TRBC1	CAWISGGSPLHF	TGTGCCTGGATCAGCGGGGGGTCACCCCTCCACTTT	1	0.0711744
TRBV30	TRBJ2-2	TRBC2	CAWMLRGPGELFF	TGTGCCTGGATGCTCCGGGGGCCCGGGGAGCTGTTTTTT	1	0.0711744
TRBV30	TRBJ2-1	TRBC2	CAWNIAGGSNEQFF	TGTGCCTGGAATATAGCGGGAGGAAGCAATGAGCAGTTCTTC	1	0.0711744
TRBV30	TRBJ2-7	TRBC2	CAWRVGGGGLGYEQYF	TGTGCCTGGAGGGTAGGAGGCGGGGGTTTGGGCTACGAGCAGTACTTC	1	0.0711744
TRBV30	TRBJ2-5	TRBC2	CAWSPKETQYF	TGTGCCTGGAGTCCTAAAGAGACCCAGTACTTC	1	0.0711744
TRBV30	TRBJ1-1	TRBC1	CAWSPWGNTEAFF	TGTGCCTGGAGCCCCTGGGGGAACACTGAAGCTTTCTTT	1	0.0711744
TRBV30	TRBJ1-1	TRBC1	CAWSRARNTEAFF	TGTGCCTGGAGTCGGGCAAGGAACACTGAAGCTTTCTTT	1	0.0711744
TRBV30	TRBJ1-1	TRBC1	CAWSVRGTEAFF	TGTGCCTGGAGTGTGAGGGGAACTGAAGCTTTCTTT	1	0.0711744
TRBV30	TRBJ1-2	TRBC1	CAWSVSPHGYTF	TGTGCCTGGAGTGTATCCCCACATGGCTACACCTTC	1	0.0711744
TRBV20-1	TRBJ1-1	TRBC1	CRAYRAMNTEAFF	TGCAGGGCCTACAGGGCCATGAACACTGAAGCTTTCTTT	1	0.0711744
TRBV29-1	TRBJ1-3	TRBC1	CRSRDRASGNTIYF	TGCAGATCCCGGGACAGGGCGTCTGGAAACACCATATATTTT	1	0.0711744
TRBV20-1	TRBJ2-7	TRBC2	CSAAAGLFNYEQYF	TGCAGTGCTGCAGCGGGACTTTTCAACTACGAGCAGTACTTC	1	0.0711744
TRBV20-1	TRBJ2-1	TRBC2	CSAAGRINEQFF	TGCAGTGCCGCCGGGAGGATCAATGAGCAGTTCTTC	1	0.0711744
TRBV20-1	TRBJ2-3	TRBC2	CSAEGTDTQYF	TGCAGTGCTGAAGGCACAGATACGCAGTATTTT	1	0.0711744
TRBV20-1	TRBJ2-7	TRBC2	CSAELEYEQYF	TGCAGTGCTGAGCTTGAGTACGAGCAGTACTTC	1	0.0711744
TRBV20-1	TRBJ2-7	TRBC2	CSAFLAGGPYEQYF	TGCAGTGCGTTTCTAGCGGGAGGGCCCTACGAGCAGTACTTC	1	0.0711744
TRBV20-1	TRBJ2-1	TRBC2	CSAGNNEQFF	TGCAGTGCTGGAAACAATGAGCAGTTCTTC	1	0.0711744
TRBV20-1	TRBJ2-4	TRBC2	CSAGTGKNIQYF	TGCAGTGCTGGTACGGGCAAAAACATTCAGTACTTC	1	0.0711744
TRBV20-1	TRBJ2-7	TRBC2	CSAIDTGQDSYEQYF	TGCAGTGCTATTGATACCGGACAGGACTCCTACGAGCAGTACTTC	1	0.0711744
TRBV20-1	TRBJ2-7	TRBC2	CSAIGQEVYEQYF	TGCAGTGCTATCGGACAGGAAGTCTACGAGCAGTACTTC	1	0.0711744
TRBV20-1	TRBJ2-1	TRBC2	CSAKNLAGVSNEQFF	TGCAGTGCTAAGAATCTAGCGGGAGTTTCCAATGAGCAGTTCTTC	1	0.0711744
TRBV20-1	TRBJ1-5	TRBC1	CSALGTGPNQPQHF	TGCAGTGCTTTGGGGACAGGGCCTAATCAGCCCCAGCATTTT	1	0.0711744
TRBV29-1	TRBJ1-2	TRBC1	CSANQAAAYGYTF	TGCAGCGCCAATCAGGCAGCAGCGTATGGCTACACCTTC	1	0.0711744
TRBV20-1	TRBJ2-2	TRBC2	CSAPLPGTGELFF	TGCAGTGCCCCATTGCCAGGAACCGGGGAGCTGTTTTTT	1	0.0711744
TRBV20-1	TRBJ1-5	TRBC1	CSARDGRENQPQHF	TGCAGTGCTAGAGACGGACGGGAGAATCAGCCCCAGCATTTT	1	0.0711744
TRBV20-1	TRBJ2-7	TRBC2	CSARDPGVDYEQYF	TGCAGTGCTAGAGACCCGGGGGTGGATTACGAGCAGTACTTC	1	0.0711744
TRBV20-1	TRBJ1-3	TRBC1	CSARDRTGWNTIYF	TGCAGTGCTAGAGATAGGACAGGATGGAACACCATATATTTT	1	0.0711744
TRBV20-1	TRBJ2-1	TRBC2	CSARDRTSGSKSSYNEQFF	TGCAGTGCTAGAGATAGGACTAGCGGGAGTAAGAGCTCCTACAATGAGCAGTTCTTC	1	0.0711744
TRBV20-1	TRBJ2-3	TRBC2	CSARDVAGGTDTQYF	TGCAGTGCTAGAGATGTAGCGGGGGGCACAGATACGCAGTATTTT	1	0.0711744
TRBV20-1	TRBJ2-1	TRBC2	CSARGRVRYNEQFF	TGCAGTGCTAGAGGGAGGGTACGGTACAATGAGCAGTTCTTC	1	0.0711744
TRBV20-1	TRBJ2-7	TRBC2	CSARGSRRSYEQYF	TGCAGTGCTAGAGGTAGCAGAAGATCCTACGAGCAGTACTTC	1	0.0711744
TRBV20-1	TRBJ2-7	TRBC2	CSARGSRRSYEQYF	TGCAGTGCTAGAGGTAGCAGAAGATCCTACGAGCAGTACTTC	1	0.0711744
TRBV20-1	TRBJ2-7	TRBC2	CSARGTSGGPPYEQYF	TGCAGTGCTAGAGGGACTAGCGGGGGACCCCCCTACGAGCAGTACTTC	1	0.0711744
TRBV20-1	TRBJ2-7	TRBC2	CSARIGLVYEQYF	TGCAGTGCTAGAATCGGACTAGTTTACGAGCAGTACTTC	1	0.0711744
TRBV20-1	TRBJ2-5	TRBC2	CSARSGGSLQETQYF	TGCAGTGCCAGATCTGGCGGGAGTCTCCAAGAGACCCAGTACTTC	1	0.0711744
TRBV20-1	TRBJ1-6	TRBC1	CSARSPGAYNSPLHF	TGCAGTGCTAGATCTCCAGGGGCCTATAATTCACCCCTCCACTTT	1	0.0711744
TRBV20-1	TRBJ1-6	TRBC1	CSARTGGSYNSPLHF	TGCAGTGCGCGGACAGGAGGCTCCTATAATTCACCCCTCCACTTT	1	0.0711744
TRBV20-1	TRBJ2-3	TRBC2	CSARVAGASTDTQYF	TGCAGTGCTAGGGTGGCGGGGGCGAGCACAGATACGCAGTATTTT	1	0.0711744
TRBV20-1	TRBJ1-1	TRBC1	CSASAAGEAFF	TGCAGTGCTAGTGCGGCGGGTGAAGCTTTCTTT	1	0.0711744
TRBV20-1	TRBJ2-7	TRBC2	CSASDPAGGDEQYF	TGCAGTGCTAGTGACCCTGCCGGGGGCGACGAGCAGTACTTC	1	0.0711744
TRBV20-1	TRBJ1-1	TRBC1	CSASFYLMGMDTEAFF	TGCAGTGCTAGTTTTTACCTCATGGGAATGGACACTGAAGCTTTCTTT	1	0.0711744
TRBV20-1	TRBJ2-7	TRBC2	CSASLAGDLDEQYF	TGCAGTGCTAGCTTGGCGGGAGATTTAGACGAGCAGTACTTC	1	0.0711744
TRBV20-1	TRBJ2-7	TRBC2	CSASPRLTYEQYF	TGCAGTGCAAGCCCCAGGCTCACCTACGAGCAGTACTTC	1	0.0711744
TRBV20-1	TRBJ1-1	TRBC1	CSASSQQEMNTEAFF	TGCAGTGCTAGCTCCCAACAGGAGATGAACACTGAAGCTTTCTTT	1	0.0711744
TRBV20-1	TRBJ2-1	TRBC2	CSASTGGSSYNEQFF	TGCAGTGCTAGTACGGGAGGGAGCTCCTACAATGAGCAGTTCTTC	1	0.0711744
TRBV20-1	TRBJ1-1	TRBC1	CSASVMNTEAFF	TGCAGTGCTAGTGTCATGAACACTGAAGCTTTCTTT	1	0.0711744
TRBV20-1	TRBJ1-5	TRBC1	CSASYQGFNQPQHF	TGCAGTGCTAGCTACCAGGGCTTTAATCAGCCCCAGCATTTT	1	0.0711744
TRBV20-1	TRBJ2-1	TRBC2	CSATGTSGSFNEQFF	TGCAGTGCCACCGGAACTAGCGGGAGTTTTAATGAGCAGTTCTTC	1	0.0711744
TRBV20-1	TRBJ2-1	TRBC2	CSATGTSGSFNEQFF	TGCAGTGCCACCGGAACTAGCGGGAGTTTTAATGAGCAGTTCTTC	1	0.0711744
TRBV20-1	TRBJ2-3	TRBC2	CSATLGGGATDTQYF	TGCAGTGCTACCCTCGGGGGCGGGGCCACAGATACGCAGTATTTT	1	0.0711744
TRBV20-1	TRBJ2-1	TRBC2	CSATSGMGTNEQFF	TGCAGTGCGACTAGCGGGATGGGAACCAATGAGCAGTTCTTC	1	0.0711744
TRBV20-1	TRBJ1-1	TRBC1	CSATTGTFTEAFF	TGCAGTGCTACGACCGGGACTTTCACTGAAGCTTTCTTT	1	0.0711744
TRBV20-1	TRBJ2-5	TRBC2	CSAYDLSGQETQYF	TGCAGTGCTTACGACCTTAGCGGGCAAGAGACCCAGTACTTC	1	0.0711744
TRBV29-1	TRBJ2-2	TRBC2	CSGGQWGTGELFF	TGCAGCGGGGGACAGTGGGGCACCGGGGAGCTGTTTTTT	1	0.0711744
TRBV20-1	TRBJ1-5	TRBC1	CSGKTGKPYQPQHF	TGCAGTGGGAAGACAGGGAAACCTTATCAGCCCCAGCATTTT	1	0.0711744
TRBV20-1	TRBJ2-3	TRBC2	CSGTPGGASTDTQYF	TGCAGTGGCACACCTGGGGGGGCTTCCACAGATACGCAGTATTTT	1	0.0711744
TRBV20-1	TRBJ1-2	TRBC1	CSSTGKERGYTF	TGCAGTTCAACAGGGAAAGAACGTGGCTACACCTTC	1	0.0711744
TRBV29-1	TRBJ2-7	TRBC2	CSVASGNSYEQYF	TGCAGCGTTGCTAGCGGGAACTCCTACGAGCAGTACTTC	1	0.0711744
TRBV29-1	TRBJ2-3	TRBC2	CSVEDLGGTDTQYF	TGCAGCGTTGAGGACCTTGGGGGCACAGATACGCAGTATTTT	1	0.0711744
TRBV29-1	TRBJ2-5	TRBC2	CSVEEGQSHRETQYF	TGCAGCGTTGAAGAGGGACAGTCCCATCGAGAGACCCAGTACTTC	1	0.0711744
TRBV29-1	TRBJ2-1	TRBC2	CSVERLAGVEQFF	TGCAGCGTTGAAAGACTAGCGGGAGTTGAGCAGTTCTTC	1	0.0711744
TRBV29-1	TRBJ1-1	TRBC1	CSVEVGMNTEAFF	TGCAGCGTTGAAGTAGGCATGAACACTGAAGCTTTCTTT	1	0.0711744
TRBV29-1	TRBJ1-2	TRBC1	CSVEYGYTF	TGCAGCGTTGAATATGGCTACACCTTC	1	0.0711744
TRBV29-1	TRBJ2-3	TRBC2	CSVLGGNGADTQYF	TGCAGCGTCTTGGGCGGGAATGGGGCAGATACGCAGTATTTT	1	0.0711744
TRBV29-1	TRBJ2-7	TRBC2	CSVLVQRLLSSYEQYF	TGCAGCGTACTAGTACAGAGACTGCTCTCCTCCTACGAGCAGTACTTC	1	0.0711744
TRBV29-1	TRBJ1-4	TRBC1	CSVVEGTGKLFF	TGCAGCGTTGTAGAGGGTACGGGAAAACTGTTTTTT	1	0.0711744
TRBV4-2	TRBJ1-2	TRBC1	CASSQDRADGYTF	TGTGCCAGCAGCCAAGACCGGGCGGACGGCTACACCTTC	1	0.0711744
TRBV5-4	TRBJ2-3	TRBC2	CASSLGLDGADTQYF	TGTGCCAGCAGCTTGGGACTAGATGGGGCAGATACGCAGTATTTT	1	0.0711744
