# Supplementary material for: Immune landscape of the affected brain in Rasmussen encephalitis
Source: Research Square preprint supplement (doi:10.21203/rs.3.rs-8584794/v1), 2026-01-29
Supplement: Supplementary file 2 [file 53ba0856efefe03615765269.xlsx]

## Sheet: 738
chrom		start	end	length	source	chromosome	LTR	region	strand	coverage	coverage_fraction
chr1	1	155626666	155635845	9179	323758273001826	1q22	LTR5	None|Exonic	-	9	0.3
chr1	1	160690785	160700016	9231	323758273001826	1q23.3	LTR5	ENSG00000228863|Intronic	+	8	0.24
chr3	3	101691893	101701015	9122	323758273001826	3q12.3	LTR5	PDCL3P4|Exonic	+	12	0.76
chr3	3	125890459	125899573	9114	323758273001826	3q21.2	LTR5	ENPP7P4|Intronic	+	2	0.02
chr4	4	160658786	160661208	2422	32375827	4q32.1	LTR5	None|Intergenic	+	3	0.17
chr4	4	9657964	9667026	9062	323758273001826	4p16.1b	LTR5A	None|Intergenic	+	1	0.19
chr5	5	156657706	156666885	9179	32375827	5q33.3	LTR5	None|Intergenic	-	1	0.1
chr7	7	4582426	4591897	9471	323758273001826	7p22.1a	LTR5	None|Intergenic	-	2	0.11
chr7	7	4590930	4600400	9470	32375827	7p22.1b	LTR5	None|Intergenic	-	2	0.1
chr7	7	141751126	141756103	4977	323758273001826	7q34	LTR5	None|Intergenic	-	1	0.08
chr11	11	62368491	62383091	14600	323758273001826	11q12.3	LTR5	None|Intergenic	-	3	0.07
chr11	11	118721015	118730174	9159	323758273001826	11q23.3	LTR5	ENSG00000287238|Exonic	-	2	0.13
chr12	12	110570038	110571520	1482	32375827	12q24.11	LTR5	None|Intergenic	+	1	0.07
chr12	12	133090534	133096546	6012	323758273001826	12q24.33	LTR5A	None|Intergenic	-	1	0.12
chr19	19	37106647	37116164	9517	323758273001826	19q13.12b	LTR5	None|Intronic	-	1	0.21
chr20	20	34126944	34136578	9634	323758273001826	20q11.22	LTR5B	ENSG00000287853|Exonic	+	8	0.77

## Sheet: 754
chrom		start	end	length	source	chromosome	LTR	region	strand	coverage	coverage_fraction
chr1	1	155626666	155635845	9179	323758273001826	1q22	LTR5	None|Exonic	-	107	0.14
chr1	1	150632808	150635885	3077	323758273001826	1q21.3	LTR5_	None|Intergenic	-	15	0.14
chr1	1	160690785	160700016	9231	323758273001826	1q23.3	LTR5	ENSG00000228863|Intronic	+	5	0.06
chr2	2	129961965	129964636	2671	32375827	2q21.1	LTR5	None|Intergenic	-	1	0.03
chr3	3	101691893	101701015	9122	323758273001826	3q12.3	LTR5	PDCL3P4|Exonic	+	118	0.66
chr3	3	125890459	125899573	9114	323758273001826	3q21.2	LTR5	ENPP7P4|Intronic	+	6	0.03
chr3	3	148563690	148567609	3919	32375827	3q24	LTR5	ENSG00000285557|Intronic	-	3	0.07
chr3	3	185562548	185571727	9179	32375827	3q27.2	LTR5	None|Intergenic	-	2	0.03
chr3	3	75551314	75559999	8685	323758273001826	3p12.3	LTR5A	None|Intergenic	+	1	0.03
chr3	3	113024632	113033435	8803	32375827	3q13.2	LTR5	None|Intergenic	-	1	0.02
chr4	4	241200	245670	4470	32375827	4p16.3a	LTR5B	ZNF876P|Intronic	+	7	0.04
chr4	4	9657964	9667026	9062	323758273001826	4p16.1b	LTR5A	None|Intergenic	+	3	0.11
chr4	4	160658786	160661208	2422	32375827	4q32.1	LTR5	None|Intergenic	+	2	0.07
chr4	4	9121789	9131349	9560	323758273001826	4p16.1a	LTR5A	ENPP7P10|Intronic	+	1	0.03
chr4	4	68597991	68603505	5514	32375827	4q13.2	LTR5A	None|Intergenic	+	1	0.01
chr4	4	164995688	165002916	7228	323758273001826	4q32.3	LTR5	None|Intergenic	+	1	0.03
chr5	5	156657706	156666885	9179	32375827	5q33.3	LTR5	|None|Intergenic	-	4	0.04
chr5	5	30487007	30496098	9091	32375827	5p13.3	LTR5	None|Intergenic	-	1	0.01
chr6	6	42893671	42903629	9958	323758273001826	6p21.1	LTR5B	ENSG00000288010|Exonic	-	31	0.31
chr7	7	4582426	4591897	9471	323758273001826	7p22.1a	LTR5	None|Intergenic	-	5	0.05
chr7	7	4590930	4600400	9470	32375827	7p22.1b	LTR5	None|Intergenic	-	5	0.04
chr8	8	7497875	7507337	9462	32375827	8p23.1a	LTR5	None|Intergenic	-	10	0.04
chr8	8	12216461	12225988	9527	323758273001826	8p23.1c	LTR5A	None|Intergenic	-	3	0.1
chr8	8	12458983	12468498	9515	32375827	8p23.1d	LTR5A	None|Exonic	-	2	0.09
chr8	8	145021262	145028825	7563	323758273001826	8q24.3b	LTR5A	None|Intergenic	-	2	0.04
chr8	8	139459906	139462993	3087	32375827	8q24.3a	LTR5	ENSG00000254258|Exonic	-	1	0.06
chr9	9	128850236	128857457	7221	323758273001826	9q34.11a	LTR5A	None|Intergenic	+	10	0.12
chr10	10	6825147	6832673	7526	323758273001826	10p14	LTR5	ENSG00000287277|Exonic	-	11	0.06
chr10	10	99820812	99827959	7147	323758273001826	10q24.2	LTR5	None|Intergenic	-	3	0.03
chr11	11	118721015	118730174	9159	323758273001826	11q23.3	LTR5	ENSG00000287238|Exonic	-	12	0.05
chr11	11	62368491	62383091	14600	323758273001826	11q12.3	LTR5	None|Intergenic	-	1	0.02
chr14	14	24011416	24014912	3496	323758273001826	14q11.2	LTR5A	DHRS4-AS1|Intronic	-	5	0.12
chr19	19	37106647	37116164	9517	323758273001826	19q13.12b	LTR5	None|Intronic	-	44	0.19
chr19	19	52745021	52749338	4317	32375827	19q13.41	LTR5B	None|Intergenic	-	12	0.13
chr19	19	385095	387637	2542	323758273001826	19p13.3	LTR5	ENSG00000286667|Exonic	+	2	0.15
chr19	19	22575022	22581759	6737	32375827	19p12c	LTR5	None|Intergenic	+	2	0.05
chr19	19	20276591	20286703	10112	323758273001826	19p12a	LTR5B	None|Intergenic	+	1	0.01
chr20	20	34126944	34136578	9634	323758273001826	20q11.22	LTR5B	ENSG00000287853|Exonic	+	135	0.81
chr22	22	18938674	18947794	9120	32375827	22q11.21	LTR5	None|Exonic	+	3	0.02
chr22	22	23537743	23546623	8880	323758273001826	22q11.23	LTR5B	PCAT14|Exonic	+	1	0.06

## Sheet: 769
chrom		start	end	length	source	chromosome	LTR	region	strand	coverage	coverage_fraction
chr1	1	13352736	13362257	9521	32375827	1p36.21b	LTR5B	None|Intergenic	+	1	0.01
chr1	1	13352445	13361837	9392	32375827	1p36.21c	LTR5B	None|Intergenic	+	1	0.01
chr1	1	150632808	150635885	3077	323758273001826	1q21.3	LTR	None|Intergenic	-	19	0.3
chr1	1	155626666	155635845	9179	323758273001826	1q22	LTR5	None|Exonic	-	138	0.19
chr1	1	160690785	160700016	9231	323758273001826	1q23.3	LTR5	ENSG00000228863|Intronic	+	6	0.12
chr3	3	101691893	101701015	9122	323758273001826	3q12.3	LTR5	PDCL3P4|Exonic	+	108	0.71
chr3	3	113024632	113033435	8803	32375827	3q13.2	LTR5	None|Intergenic	-	4	0.07
chr3	3	148563690	148567609	3919	32375827	3q24	LTR5	ENSG00000285557|Intronic	-	5	0.06
chr3	3	185562548	185571727	9179	32375827	3q27.2	LTR5	None|Intergenic	-	2	0.04
chr4	4	9121789	9131349	9560	323758273001826	4p16.1a	LTR5A	ENPP7P10|Intronic	+	2	0.05
chr4	4	9657964	9667026	9062	323758273001826	4p16.1b	LTR5A	None|Intergenic	+	3	0.12
chr4	4	160658786	160661208	2422	32375827	4q32.1	LTR5	None|Intergenic	+	6	0.09
chr5	5	30487007	30496098	9091	32375827	5p13.3	LTR5	None|Intergenic	-	3	0.03
chr5	5	156657706	156666885	9179	32375827	5q33.3	LTR5	None|Intergenic	-	4	0.06
chr6	6	42893671	42903629	9958	323758273001826	6p21.1	LTR5B	ENSG00000288010|Exonic	-	23	0.45
chr7	7	4582426	4591897	9471	323758273001826	7p22.1a	LTR5	None|Intergenic	-	15	0.06
chr7	7	4590930	4600400	9470	32375827	7p22.1b	LTR5	None|Intergenic	-	11	0.05
chr7	7	104747922	104752819	4897	32375827	7q22.2	LTR5	LHFPL3-AS1|Exonic	-	3	0.06
chr7	7	141751126	141756103	4977	323758273001826	7q34	LTR5	None|Intergenic	-	1	0.23
chr8	8	7497875	7507337	9462	32375827	8p23.1a	LTR5	None|Intergenic	-	3	0.06
chr8	8	12216461	12225988	9527	323758273001826	8p23.1c	LTR5A	None|Intergenic	-	5	0.17
chr8	8	12458983	12468498	9515	32375827	8p23.1d	LTR5A	None|Exonic	-	1	0.2
chr9	9	128850236	128857457	7221	323758273001826	9q34.11a	LTR5A	None|Intergenic	+	19	0.35
chr10	10	6825147	6832673	7526	323758273001826	10p14	LTR5	ENSG00000287277|Exonic	-	1	0.02
chr11	11	3447426	3456979	9553	323758273001826	11p15.4	LTR5A	ENPP7P15|Intronic	-	3	0.04
chr11	11	101695063	101704528	9465	32375827	11q22.1	LTR5	None|Intergenic	+	1	0.03
chr11	11	118721015	118730174	9159	323758273001826	11q23.3	LTR5	ENSG00000287238|Exonic	-	4	0.1
chr14	14	24011416	24014912	3496	323758273001826	14q11.2	LTR5A	DHRS4-AS1|Intronic	-	2	0.18
chr19	19	22575022	22581759	6737	32375827	19p12c	LTR5	None|Intergenic	+	1	0.01
chr19	19	385095	387637	2542	323758273001826	19p13.3	LTR5	ENSG00000286667|Exonic	+	3	0.08
chr19	19	27637590	27646453	8863	32375827	19q11	LTR5	None|Exonic	-	1	0.01
chr19	19	37106647	37116164	9517	323758273001826	19q13.12b	LTR5	None|Intronic	-	22	0.25
chr20	20	34126944	34136578	9634	323758273001826	20q11.22	LTR5B	ENSG00000287853|Exonic	+	63	0.75
chr22	22	18938674	18947794	9120	32375827	22q11.21	LTR5	None|Exonic	+	11	0.09
