# Supplementary material for: Immune landscape of the affected brain in Rasmussen encephalitis
Source: Research Square preprint supplement (doi:10.21203/rs.3.rs-8584794/v1), 2026-01-29
Supplement: Supplementary file 2 [file 77a6140258501c6b935741bc.pdf]

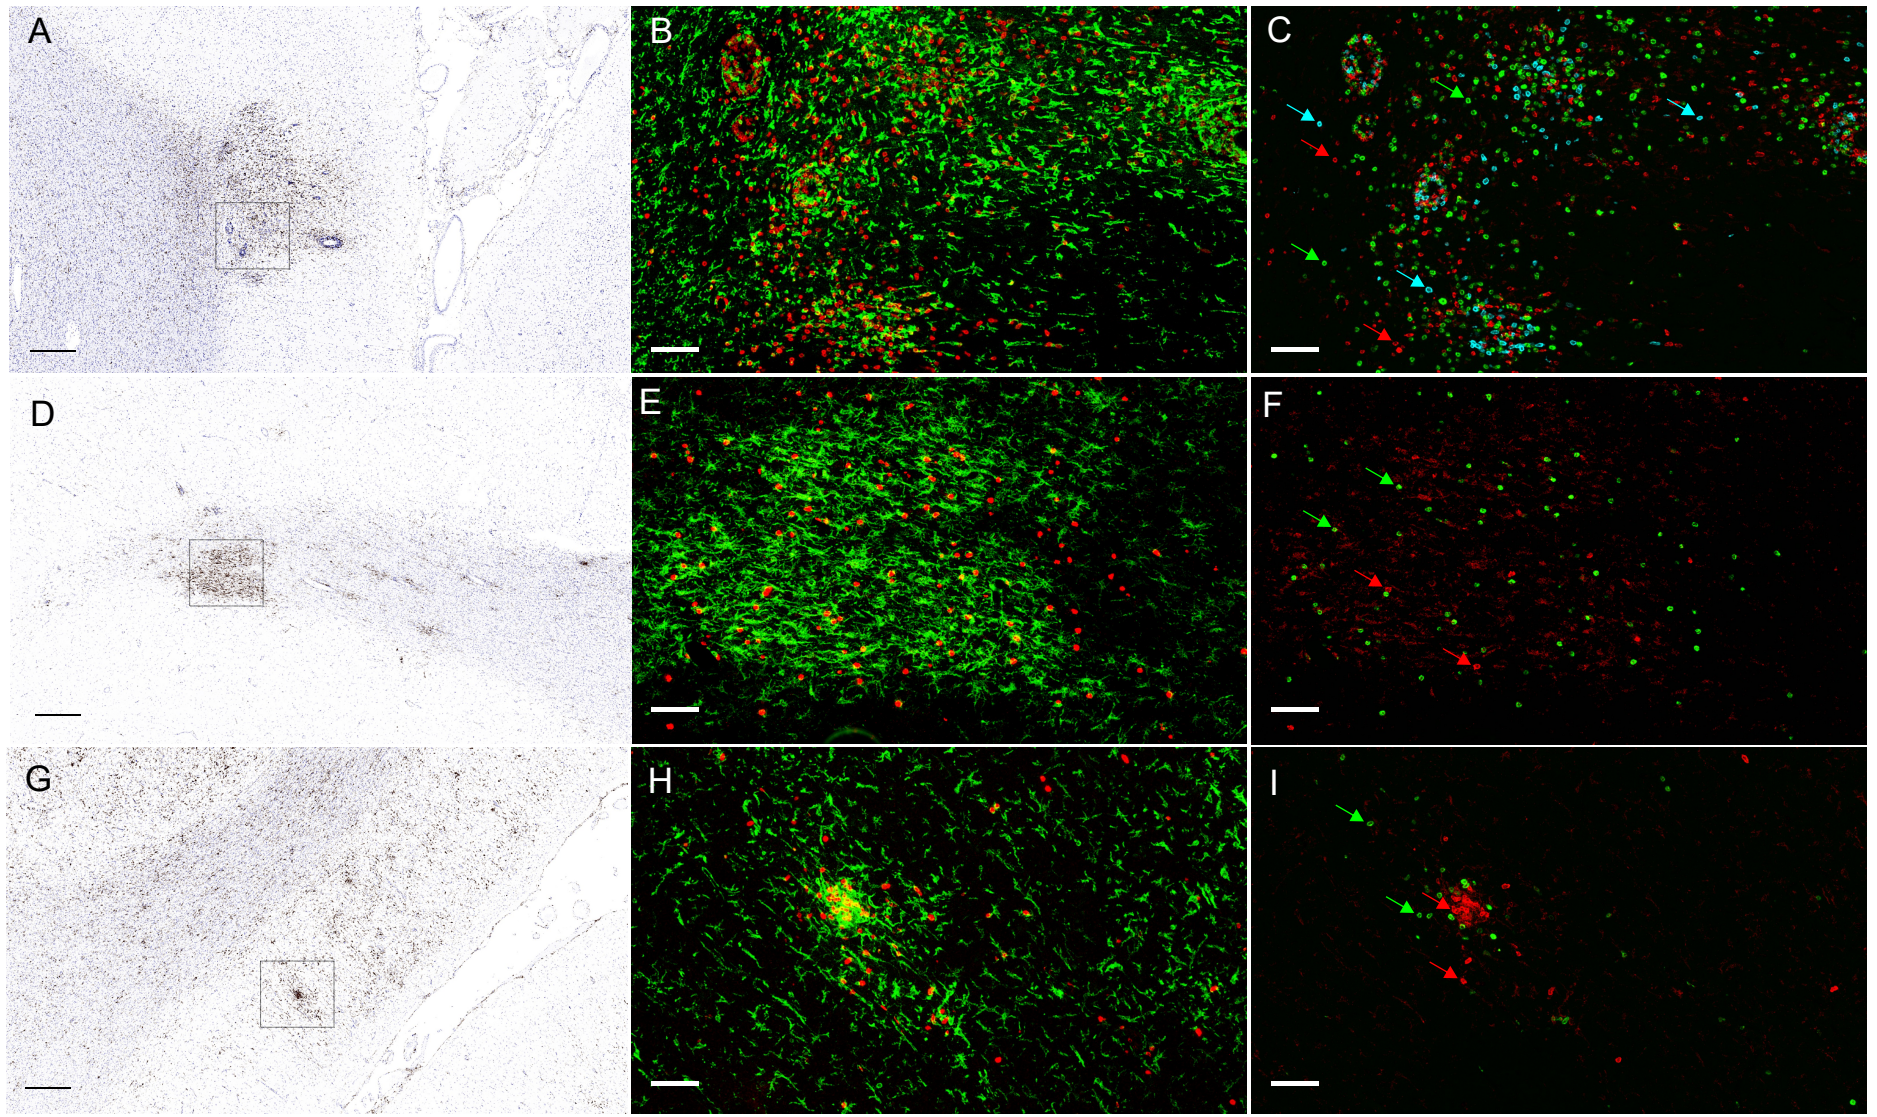

**Fig. S3:** Immune cells in sections from the three surgical specimens (Patient 738, A, B, and C; patient 754, D, E and F; patient 769, G, H and I). Scans of multiplex immunostaining for HLA-DR, CD3, CD4, CD8, and CD20 were processed in PhenolImager HT 2.0. (A, D, and G) Low power images of HLA-DR expression rendered as a histochemical stain showing focal accumulation of activated myeloid cells (scale bar = 500 microns). (B, E and H) Higher power images of CD8 T cells (red), and HLA-DR positive myeloid cells (green). C, F and I) Images of the same area showing the CD8 T cells (green), CD4 T cells (red) and B cells (tourquoise). Colored arrows point to examples of the different immune cells (scale bar = 100 microns).
