# Supplementary material for: Immune landscape of the affected brain in Rasmussen encephalitis
Source: Research Square preprint supplement (doi:10.21203/rs.3.rs-8584794/v1), 2026-01-29
Supplement: Supplementary file 3 [file c98aa831656bcace6f169f40.pdf]

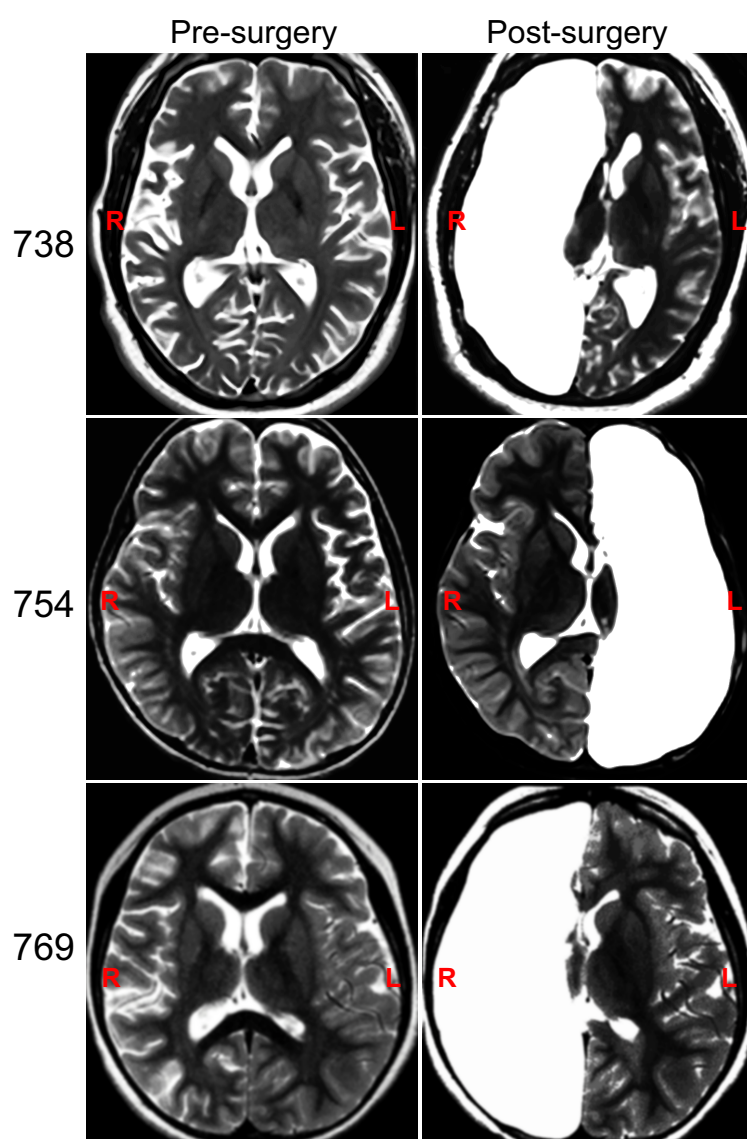

**Fig. S1:** T2 MRI scans of the three RE surgery cases, 738, 754, and 769 before and after surgery showing the affected cortical area that was removed.
