# Supplementary material for: Immune landscape of the affected brain in Rasmussen encephalitis
Source: Research Square preprint supplement (doi:10.21203/rs.3.rs-8584794/v1), 2026-01-29
Supplement: Supplementary file 4 [file c9fcb95bcd4a18d5653ef644.pdf]

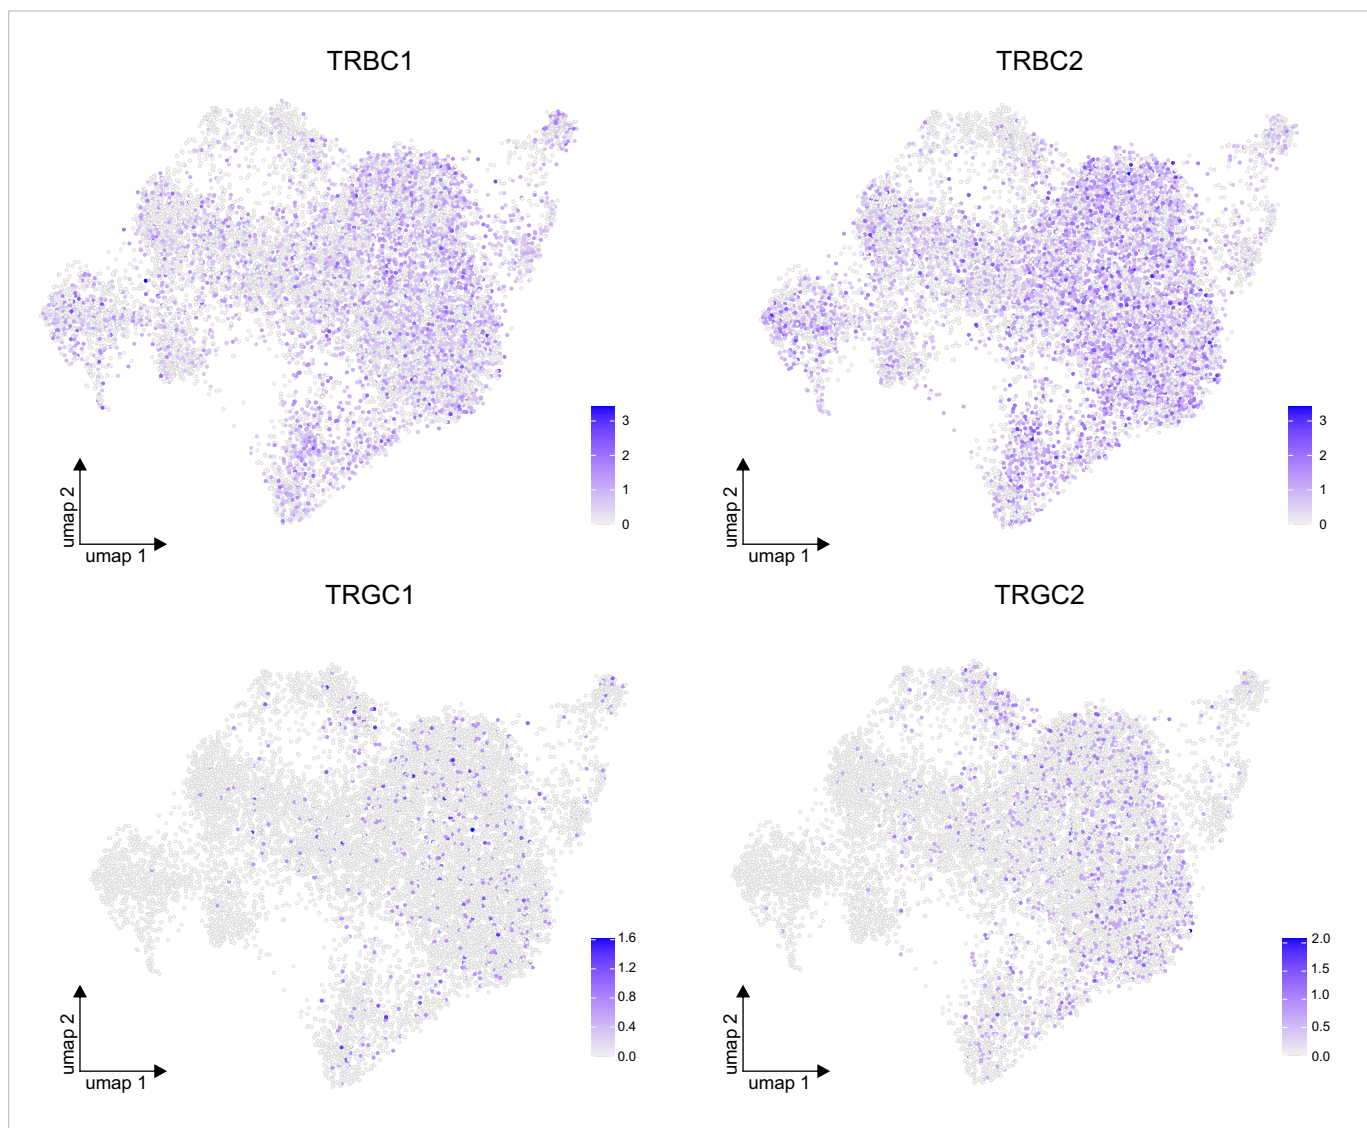

**Fig. S4:** Feature plots showing the normalized expression of TCR constant region genes in a UMAP of the T cells and NK cells extracted from the integrated scRNA-seq gene expression data from the three surgical cases.
