# Supplementary material for: Immune landscape of the affected brain in Rasmussen encephalitis
Source: Research Square preprint supplement (doi:10.21203/rs.3.rs-8584794/v1), 2026-01-29
Supplement: Supplementary file 5 [file fb2a537dc231860fe3441e70.pdf]

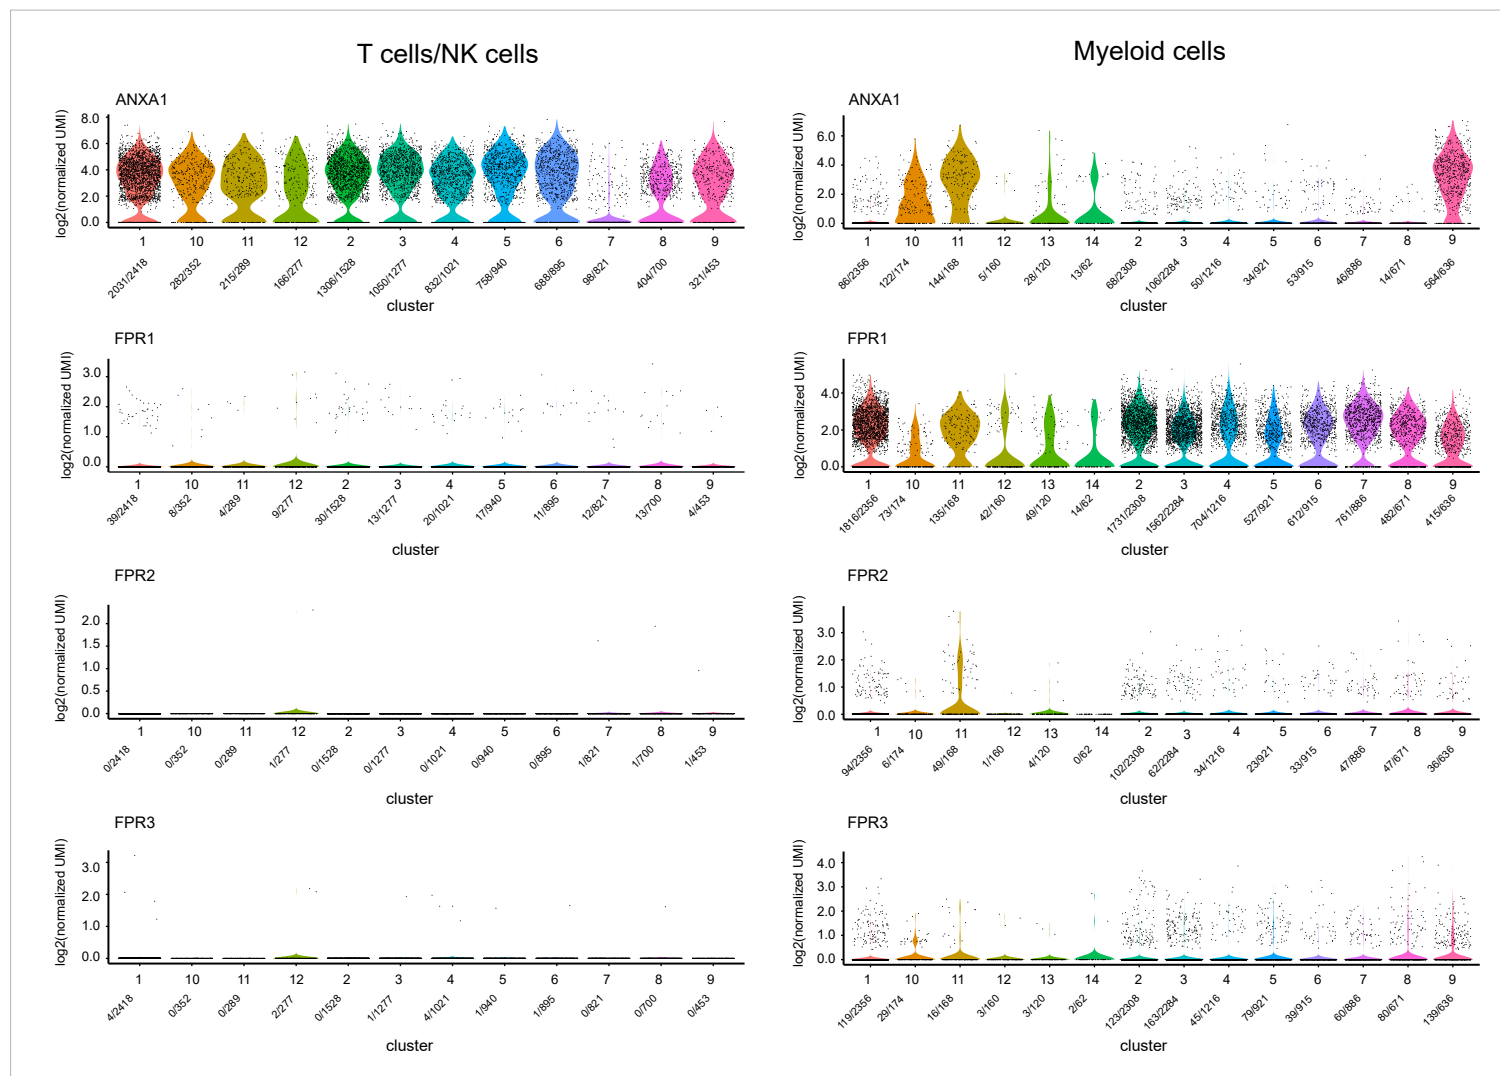

**Fig. S11:** Violin plots showing the normalized expression of annexin A1 transcripts in T cells, NK cells, and myeloid cells, and the normalized expression of the different formylated protein receptor genes.
