# Supplementary material for: Immune landscape of the affected brain in Rasmussen encephalitis
Source: Research Square preprint supplement (doi:10.21203/rs.3.rs-8584794/v1), 2026-01-29
Supplement: Supplementary file 6 [file fe0682c4bd3ad06e258b44c5.pdf]

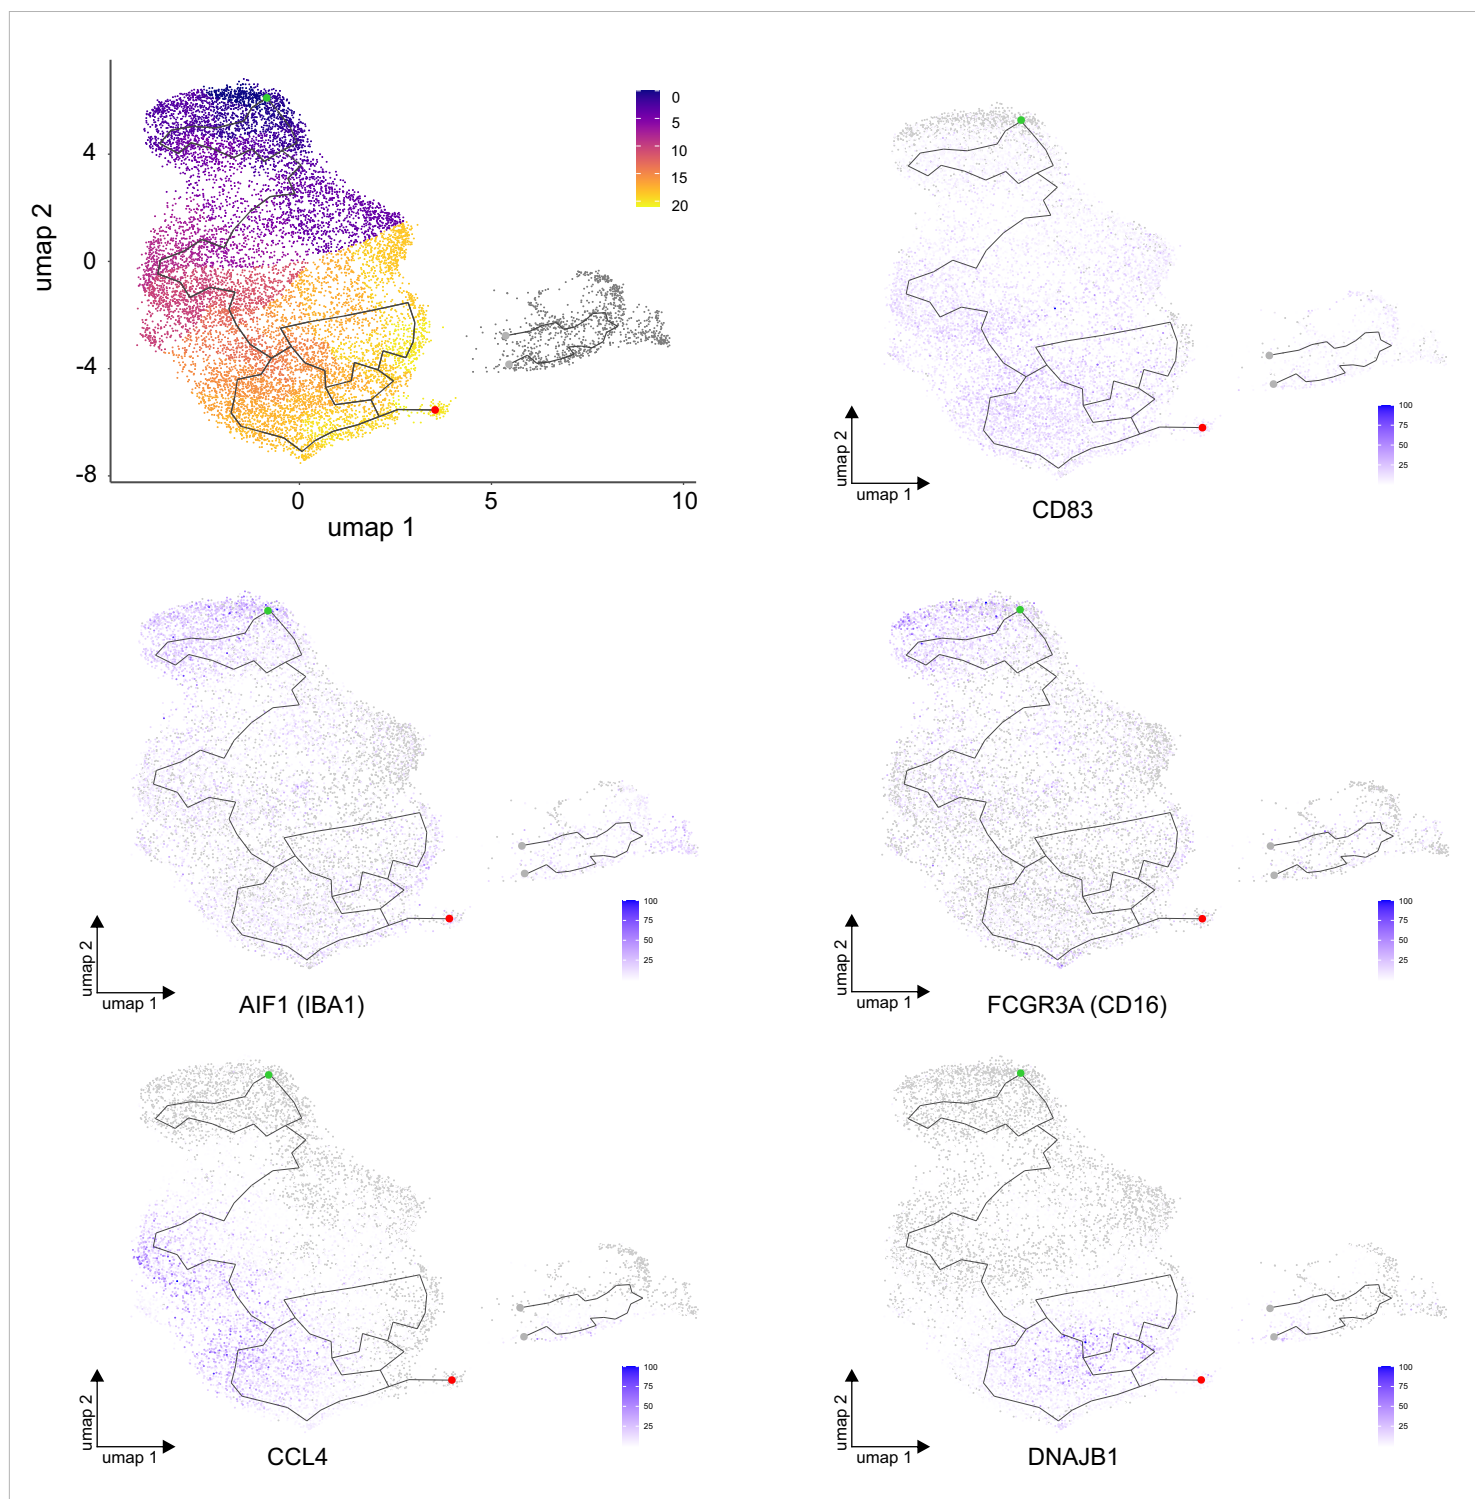

**Fig. S10:** Trajectory analysis to show the potential connectedness of microglia clusters. Feature plots show the normalized expression (expressed as a percentage) of genes that best define different transitional subpopulations (see also Fig. 6F).
