# Supplementary figures and images for: Immune landscape of the affected brain in Rasmussen encephalitis
Source: Research Square preprint supplement (doi:10.21203/rs.3.rs-8584794/v1), 2026-01-29

Fig. S13

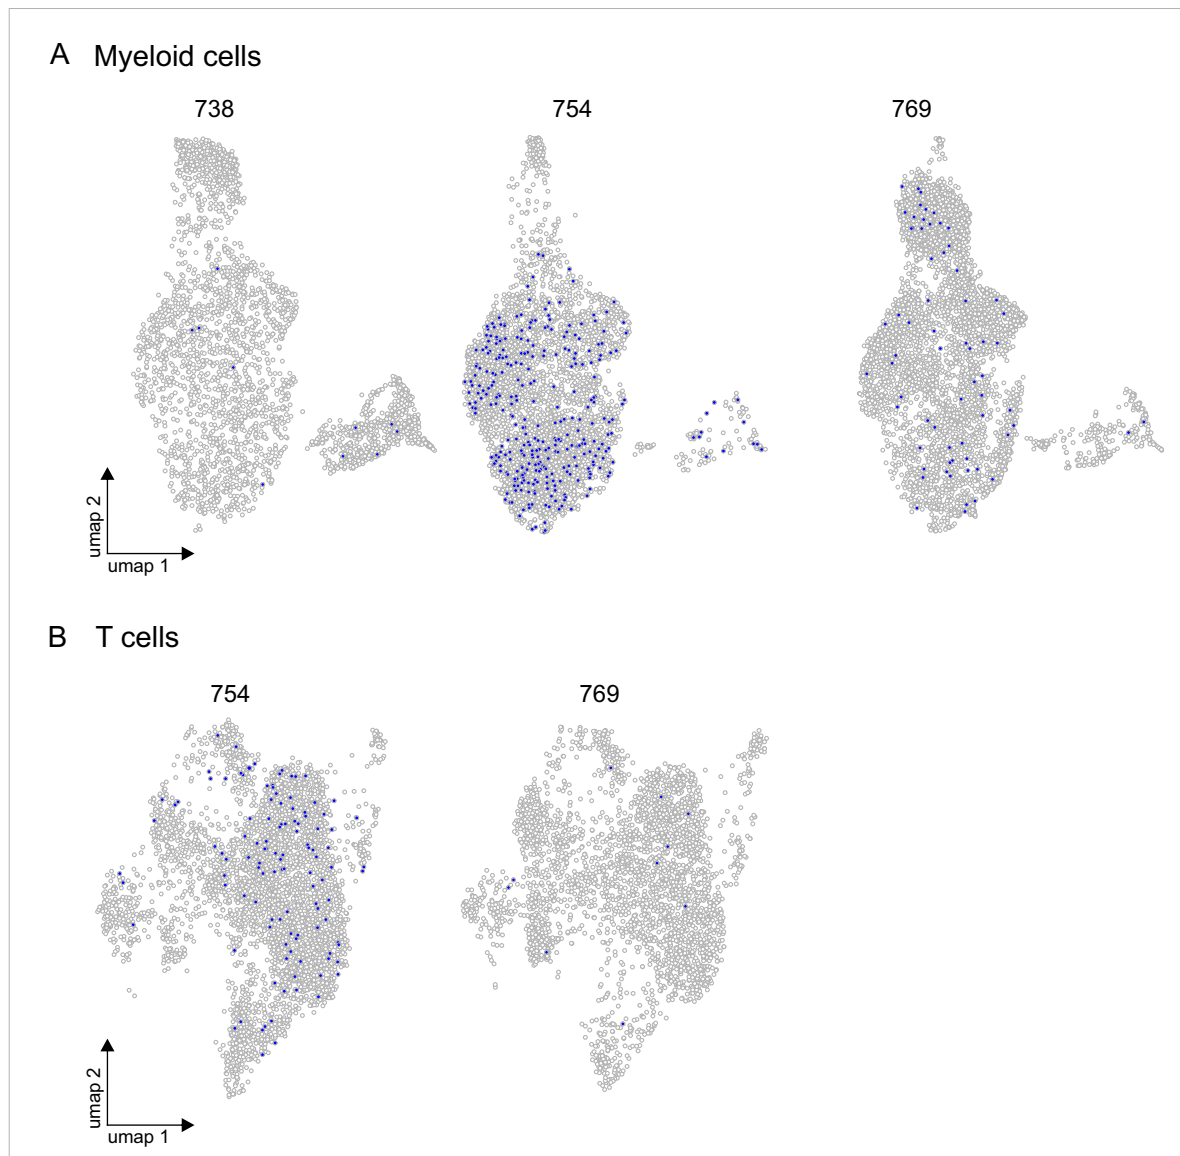

**Fig. S13:** Feature plots in which cells that express HERV-K transcripts are shown in blue.

Supplement: Supplementary file 1 [file 13c64ea481ccca40caba8ed2.pdf]
